# Supplementary material for: Genome-wide identification and characterization of phased small interfering RNA genes in response to Botrytis cinerea infection in Solanum lycopersicum
Source: PubMed Central journal article supplement (PMC5465084; doi:10.1038/s41598-017-02233-x), 2017-06-08
Supplement: 41598_2017_2233_MOESM1_ESM.pdf [file 41598_2017_2233_MOESM1_ESM.pdf]

# Genome-wide identification and characterization of phased small interfering RNA genes in response to *Botrytis cinerea* infection in *Solanum lycopersicum*

Fangli Wu, Yue Chen, Xing Tian, Xiaole Zhu, Weibo Jin\*

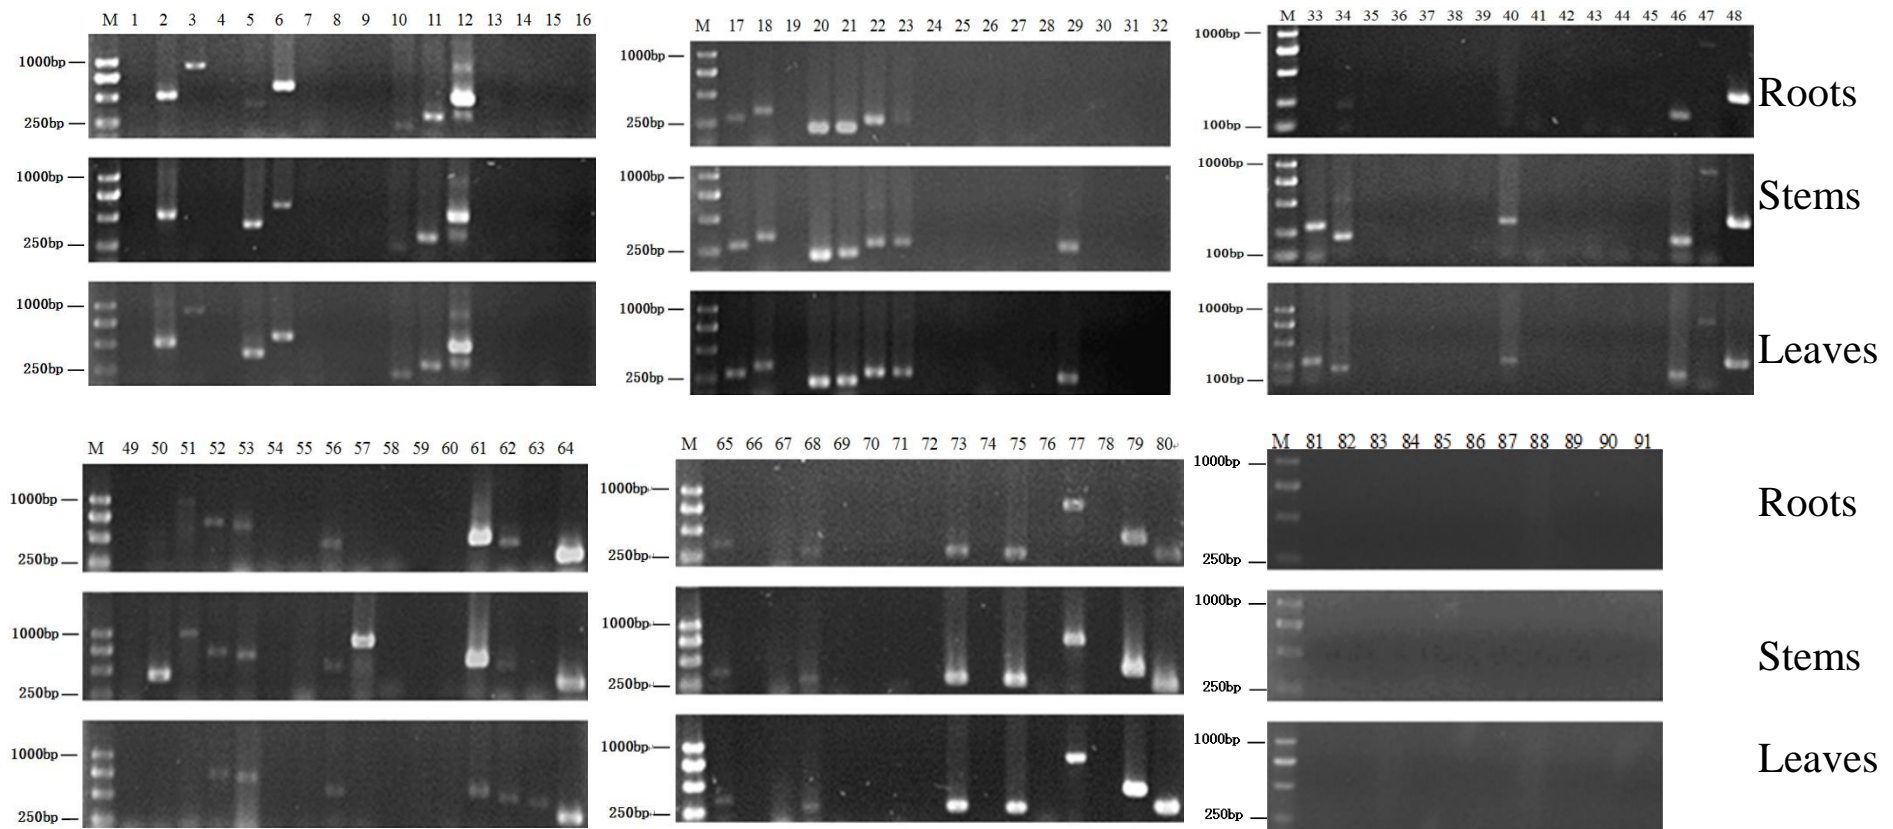

Figure S1. Transcriptional activities of the 91 *PHAS* loci detected by RT-PCR



PHAS15: 661 agatagcgatacaaggagacagaaggaaaacataatgaacatgaaaagaagacagagggt 720  
 |||  
 Sbjct: 37325968 agatagcgatacaaggagacagaaggaaaacataatgaacatgaaaagaagacagagggt 37325909

PHAS15: 721 cgcagcgggtaaccataaatggtatgtatcaccaggcttgggtgattcctctccctgtctt 780  
 |||  
 Sbjct: 37325908 cgcagcgggtaaccataaatggtatgtatcaccaggcttgggtgattcctctccctgtctt 37325849

PHAS15: 781 ggatggtgatatttgcgatgaagcaccaaaacttgcacatccccgtcctcatatagtactgt 840  
 |||  
 Sbjct: 37325848 ggatggtgatatttgcgatgaagcaccaaaacttgcacatccccgtcctcatatagtactgt 37325789

PHAS15: 841 aatcataaccaggaacaactagcattataacattacagtcttatacatgaaagttttgc 900  
 |||  
 Sbjct: 37325788 aatcataaccaggaacaactagcattataacattacagtcttatacatgaaagttttgc 37325729

PHAS15: 901 gagaatttcaaagtcgatgacatatagccatataacttgtattcaacagtcacttggggtta 960  
 |||  
 Sbjct: 37325728 aagaatttcaaagtcgatgacatatagccatataacttgtattcaacagtcacttggggtta 37325669

PHAS15: 961 attagcagcaagtccaatattagaaaacctcacaatgtaaatcacagtttggatagaag 1020  
 |||  
 Sbjct: 37325668 attagcagcaagtccaatattagaaaacctcacaatgtaaatcacagtttggatagaag 37325609

PHAS15: 1021 acctgggctaccgtctacctgaatgtcattattacatgaagtatggggattgcaattttg 1080  
 |||  
 Sbjct: 37325608 acctgggctaccgtctacctgaatgtcattattacatgaagtatggggattgcaattttg 37325549

PHAS15: 1081 gatctttgtgtaaatactcttatcatcagtgctatgggtctcctgacctgtaagcaactt 1140  
 |||  
 Sbjct: 37325548 gatctttgtgtaaatactcttatcatcagtgctatgggtctcctgacctgtaagcaactt 37325489

PHAS15: 1141 gccatgtaatccttagattgaaattcttcaactgcaatttaattgttttatcttt 1193  
 |||  
 Sbjct: 37325488 gccatgtaatccttagattgaaattcttcaactgcaatttaattgttttatcttt 37325436

>SL2.50ch11  
 Length = 56302525

Score = 1586 bits (800), Expect = 0.0  
 Identities = 966/1020 (94%), Gaps = 1/1020 (0%)  
 Strand = Plus / Minus

PHAS26: 1 ttagcatgggataaacattatagatttcgggtcctattacggttggccttcgggatcggagt 60  
 |||  
 Sbjct: 18740598 ttagcatgggataaacattatagaatttgggtcctattacattggccttcgggatcggagt 18740539

PHAS26: 61 aatgattaacagggacagtcgggggacattcgtatttcatagtcagaggtgaaattcttgg 120  
 |||  
 Sbjct: 18740538 aatgattaacagggacagtcgggggacattcgtatttcatattcataggtgaaattcttgg 18740479

PHAS26: 121 atttatgaaagacgaaaaactgcaacgcatttgcgaaggatgttttcattaatcaagaa 180  
 |||  
 Sbjct: 18740478 atttatgaaagacgaaaaactgcaacgcatttgcgaaggatgttttcattaatcaagaa 18740419

PHAS26: 181 cgaaagttgggggctcaaagacgatcagatactgtcccagttctcaaccataaacgatgcc 240  
 |||  
 Sbjct: 18740418 cgaaagttgggggctcaaagacgatcagatactgtcccagttctcaaccataaacgatgcc 18740359

PHAS26: 241 gaccagggatcggcggtggttcttttaggactccgccggcaccttatgagaaatcaaag 300  
 |||  
 Sbjct: 18740358 aaccagggatctgatgatggttcttttaggactccgccggcaccttatgagaaatcaaag 18740299



1 Genome-wide identification and characterization of phased small interfering RNA genes in response to Botrytis cinerea infection in Solanum lycopersicum
2 Fangli Wu, Yue Chen, Xing Tian, Xiaole Zhu, Weibo Jin

Table S1 Sequences of the 91 PHASs identified via PhaseTank pipeline.

7 //
8 >PHAS11 excise\_beg:3823470 excise\_end:3824094 excise\_len:625 Phased\_ratio:0.457 Phased\_num:14 phased\_abun:865
9 .....

```

132 >PHAS48 excise_beg:54263089 excise_end:54263986 excise_len:898 Phased_ratio:0.455 Phased_num:17 phased_abun:1238
133 .....TGCGGTAAGACAACACTAGC.....
134 .....TAAAGCGGTTTACAATGATGA.....
135 .....TCAAGAAATGGCTCAITTGA.....
136 .....TGATGTGGAATGATGACTA.....
137 .....
138 .....
139 .....
140 .....
141 .....
142 .....
143 .....
144 .....
145 ATTGCTCAAGATGCAAGTGGACGAAACCTCAGTGTAGTCTCTATTGTAGGAATGGTGGTGGGTAAGACAACACTAGCTAAAGCGGTTTACAATGATGACAAGGTGAAGAATCATTTTAGTTTGAAGGTTGGTATTGTGTTTCTGAGGCATATGATGCTTTGAGAATAACAAAGGTTTACTTCAAGAAATGGCTCAITTTAGGCCAAAGGTAACGGTAAATTTAATAGCTACAAGTCAAATGAAGAAAGCCTGAAGGAAAGAGTTCCTTGTGTCTCGATGATGTGGAATGATGACTATAGTAGTGGGAACACCTGAGAAATGTTTT
146 TAACAGACTTCTACGTTACCTGCTTTGGAGTGACATCAAGGATAACCTTACCACCAAGCCCACTCTGTGTGATCGATTTCGCCAAATGTTACTACTGTTCCACTTCTAGTAAATCAAATTTCCAAACATAACACAAAGACTCCGATATACGAAACTCTTATGGTTCCAAATGAAGTCTTTAAACCGAGTAAACTCGGTTTCTACTGCAATTAATGTTTAAAGTAAATTTAATAGCTACAAGTCAAATGAAGAAAGCCTGAAGGAAAGAGTTCCTTGTGTCTCGATGATGTGGAATGATGACTATAGTAGTGGGAACACCTGAGAAATGTTTT
147 .....CTCGGTTTCTACTGCCATTA.....AAATTTTCGATGTTTCAGTTT.....
148 .....
149 .....
150 .....
151 .....
152 .....
153 .....
154 .....
155 //
156 >PHAS13 excise_beg:2161857 excise_end:2162313 excise_len:457 Phased_ratio:0.773 Phased_num:12 phased_abun:227
157 .....TTGATCTTCTAGCCGAGACAC.....
158 .....ATTGCTCTCAAAGTACGGAA.....TTGAGTCTCTTGAAGGATGCA.....TCTCGAGCTTGACACATCTT.....TCTTGAGATAATTGTGGGA.....
159 .....
160 .....
161 .....
162 CGAGATCAAGAATATATTATGGATATGCCAATACACAGTCCACTTCCATAGCCCATCAGAGTCTTCCAAAATCAITGAAAAATTTAGAAATGCTTCTTGTATCTTCTAGCCGACACACTGATAGTTTGTCTCTGACACAGGATCTTGGCCAACTTTTGAACCTGGATCCACGTAATCCATCACTTACTCTCATATGAAATGGCTCTCAAAGGTACGAAATGGAGTCTTGAAGGATGCATCCTTGGAGATAATTGTGGGAGAGATTAGGAATTCAGAAAGCTAAGAGAAAGCAAGTGTGTGTGATCTCTCCAGAAAGTGTGTTAAACGAA
163 GCTCTAGTTCTTATATAAATACCTATACGGTTATGTGTGAGGTGAAGGTATCGGGTAGTCTCGACGAAAGGTTTTAGTAACTTTTAAATCTTAAACGAAAGACTAGAAGATCGGCTGTGACATATCAACAGAGACTGTGCTTAGAAACGGTGTGGAAACTTTGACTATAGTGCATTAGGTAGTAATGGAATATACTTAAACGAGATTTCCATGCTTAACTCCAGAACTCCCTACGTAGGAACCTCTATTAAACCTCTCTAAATCCTTAAGTCTTTCGATCTCTCGTCAACACACCATAGAGAGGCTTCAACCAATTTGCTT
164 .....TCTCGACGAAAGTTTTAGT.....
165 .....AACTTTTAAATCTTAACGAA.....TTAGGTAGTAATGGAAGTATA.....TTGCATTCTCTCGTCAACA.....ACCAATTTGCTT
166 .....
167 .....
168 .....
169 .....
170 .....
171 .....
172 .....
173 //
174 >PHAS59 excise_beg:66918286 excise_end:66918700 excise_len:415 Phased_ratio:0.595 Phased_num:8 phased_abun:361
175 .....ATATGGATGACATGACTGGC.....AATGAATTCACCGTTCTCAT.....
176 .....
177 .....
178 .....
179 CCTTATCCAAAACGAAATTCATGGACATGAGTAGAGATTGTTGTTTATGGATGGAGTCATPGCGATGACATGACTGGCCATGCTATTGAACTTGACTCGGTTGCGAGCGTCTGTTGGGACAAATGATTCCAATAGCAGCCTATCCAACTCTCTATCTCCAAAGACTCAACCTTTCTTGGAAATGAAATCCACGGTCTCATATCTCGCCGTAATTTGGTAGGTTCTCGAGCTTGACACATCTTGATCTTTCAACTCCAATTTCTCAGGTCAAATCTCTCTGAAATCTCTCATCTTCCAAAGTACACTCTCTGCTCTATGCTACTGGTAGTC
180 GGAATAGGTTTTTGGCTTAAGTACTTGTACTCTACACAAATACCTACTCAGTATACGCTACTGTACTGACCGGTACAGTAACTTGAAGTGGACCAACCTCGGACAGAACCACTGTTAACTAGGTTATCGTCTGAGTAAGTTGAGAGAGTAGAGGTTTTGAGTGGAAAGAACTTACTTAAAGTGCAGAGATAGAGCGGACTTAAACCACTCCAGAGCTCGAACTGTGTAGAACTAGAAATGTTGAGGTTAAAGAGTCCAGTTTAAAGGAGACTTAGAGAGTAGAAAGGTTCAATGTAGAGAGACAGAGATCGATGACCATCAG
181 .....AGCCAACCTCGGACAGAAC.....CGGATAAGTTGAGAGAGTAG.....AGGTTTCTGAGTTGGAAGAA.....ATGTGAGAGAGCAGAGATAC.....GATGACCATCAG
182 .....
183 .....
184 .....
185 .....
186 .....
187 .....
188 .....
189 //
190 >PHAS77 excise_beg:4340651 excise_end:4340651 excise_len:310 Phased_ratio:0.775 Phased_num:4 phased_abun:102
191 .....TATGGATGCGAGAGGTTTCA.....TAAGGACTGTGAAAATGGTA.....TTAGCAGAACTGTTTACGG.....TCTGTTTGCAGAGGCTGAAA.....
192 .....
193 .....
194 .....
195 TTCTATCTATGATAGTTTCCAAAGAGGATTTTCTTTTGGAGCTCAGATTTGATACAATATGATGCGAAGGTTTTCATAAGGACTTGTGAAAATGTTAAAAGTTTGGAGAAAGTGGCAATAGATTTTGGAGGACTTATAGCAGGAACTTGTTCAGGCTAGAGAAAGGAGATTCAATGTTGAGATAAAAAATCGGAAATACATGATCTACTGCTGAGTTCTGTTTGCAGAGAGCTGAAATGACAAAGCATATGATGTTGAGAGAACTTACCTCTCTTCCAAACAAATGCATATG
196 AAGATAGACTCTCATCAAGGTTTCTCCTAAAGTAAAACCTGAGTCTATAACTAGTTAATACCTAACGTTCTCAAAGTATTCTCGAACCTTTTACCTTTTCAAACCTCTTCAACGGTTACTAATAACCTCTCGAAATATCGTCTTGAACAAATGTCGATCTTCTCTCTAAGTTACCCTCTATTTTGTACGCTTATGACTAGTAGCCACTCAAGACAACTGTCTCGACTTACTGTTTCTGATACGTACAACTCTTGAATGGGATGAGAGGTTGTTTACGTATTA
197 .....
198 .....
199 .....
200 //
201 >PHAS62 excise_beg:1125523 excise_end:1125895 excise_len:373 Phased_ratio:0.508 Phased_num:7 phased_abun:998
202 .....TTTTTCAGATTGCAGATAGATG.....TATTGTGTGAAAAGGAGAAAG.....GGAGTGAATTCGGAATAGGAC.....
203 .....
204 .....
205 ACGTAAATGGCCTTGAAGAGGTTTCCAAATCAAAAAGTTGATTTGATTTGCCCAATAGTCTGTTGTTTCAAAATCCAAAAGGTTATCGTCTCTACCCACGCAATTTGGGATTTGTTCCCTCAAATTTGTTACTACCCAAAGTCTAACACCATCAATGTTTTCAGATTGCAGATAGATGATGAAATATATCCATGATATATTGTTGTAAGGAGAAAGAAATTTGAGGCTCTCCGTTTGGAGTAAAGGCTTCCAGCTGATTTTGTGTTAGTAAAGGCTTAAATGTTTGGAGTAAAGGCTTGAATTTTCCACTGAA
206 TCATTACCGGAACTTTTCAAAAGTTATGATTTTCAACATTAACACAGGTTGATTCAGACACACAGGTTTAAAGTTTCCATTAAGCAAGGAGATGCGTGCATACACCTTAAACAGGAGGTTTAAACATGATGGTTTCAAGTTGATGTTTCAAAAGTCTAACGCTATCTACTCTTATATAGTGACTATATAACACACTTTCTCTCTTCACTCGAGAGGACCAAACTCCTCACTTAAAGCTTATCTCGAAGGTCGACTAAAACAAATCTCATGCCATGAAATTAACAACTGAACTTGAAGACTTAAAGAGTGAAT
207 .....AGACACACAGGTTTAAAGTT.....TAGGTTTCCATAAGCAAGAA.....TGGTTTCAAGTTTGTGATGTT.....ATCTCAATGCCATGAATTACA.....
208 .....
209 .....
210 .....
211 .....
212 .....
213 .....
214 //
215 >PHAS67 excise_beg:4209688 excise_end:4209997 excise_len:310 Phased_ratio:0.602 Phased_num:5 phased_abun:1155
216 .....CAGCGGCTGGAAGAGCACCGC.....TAGAAGCGACGATGCGCCGG.....CCGTCCGCTTCCGACCCGCA.....GGCACGTTGTTGGCTAAG.....
217 .....
218 .....
219 .....
220 GTTATCTTTCTGTTTAAACAGCCTGCCACCTTGAATCGGCTCAGCGGAGTGGTCCAGCGGCTGGAAGAGCACCGCAGCTGCGGCTTGGTTGAAAAGCAGTGGCGGAGCTACCGTGTGCTGGATTTAGCTGAACGCTTAAATCAGAATCCGGGCTAGAAGCGACGATGCGCCGCGCTCCGCTTCCGACCCGAGTAAAGGCTTATGGCCCTAAAGGCTTATGGCCCTAAAGGACAGTGTGTTGGCTAAGTCCGCGGACGGAAGCGTCCGCTGACCCCTTACGACTAAAGTTGATATTTAAATAT
221 CAATAGAAAAGCAAAATGTCGAGCGGTTGGAGCTTAGCGGATCGGCTCATCCAGTCCGACCTTCTGCTGGGCTGACGCGAACCACTTTTCGCTCACCGGCTTCTGATGACACGACCTAATGACTGCTGGAGATTTAGTCTTAGGCGGATCTTCTGCTGCTACCGGCGGACGCGAAACGCTGGGCTCATTCCGGATACCGGGATCCCGCTGACAGCAACCGATTACAGCGGCTGCTTCCGAGGCACTGCGGAACTGCTGATTCAACTATAAATATAA
222 .....TTCCGCTGACAGCACCGGAT.....
223 .....
224 .....
225 .....
226 //
227 >PHAS42 excise_beg:51458570 excise_end:51459425 excise_len:856 Phased_ratio:0.545 Phased_num:21 phased_abun:7460
228 .....TCAATTAATGGATTTGTGTA.....CAGAGGTTGAAGGTTAGGAG.....TATTTGGAGTACTGAGGCATG.....AAGTCGAGATGATAGTTGGAA.....TCTATTTCAGAAAGACTATT.....CAAAAAGATTTGTGCTCTC.....TTTACTTGTG
229 .....
230 .....
231 .....
232 .....
233 .....
234 .....
235 .....
236 .....
237 .....
238 .....
239 .....
240 ACAAATGCTTCTGAAGTTGCTCTCTCGATTACCGAAAGCAATCAAGAAATGAGTATGATCAATTAATGGATTGTGTACAGAGGTTGAAAGGTTAGGATTTCTAATGTCATAGATGATATTTGGAGTACTGAGGCATGGACCTAATGCAACAATATGTCAAATGATGACAAATAAAGCCGAATCTATAAATCTCGGCTCAAGTATGTGCTGATATGTCAACTGCCCTGATTTCCGCTCATAGTAACTTTGCTAAGTCGAGATGATGTTGAAATCTATTCAACGAAAGACTATTCAAAAAGATTTGTGCTCTCTTACTTGA
241 TGTTTACGAAAGAACTTCAACGAGAGGCTAATGGCTTTCGTTAGTCTTACTCACTACTAGTAAATACCTCAACACATGTCTCCAGACTTCCATCTCAAAGATTAACAGATATCTATAAACCTCATGACTCCGACCTGGATTCGTTTGTATACAGGTTTACTAGTTATTTCCGGCTTAAGATAATGATGAGCCGAGTTTCAACACAGCTAATACAGTTGACGGACTAAAAGGCGGATCATTCAAGAAAGGATTCAGCTTACTCAACTTAGATAAGTAGCTTTCTGATAAGTTTTTCTAAACACAGGAGAAATGAACAT
242 .....TCGGCTTAAGATAATTTGATGA.....GCCGAGTTCTACACAGACTA.....ATCAGTTGACGAGGACTAAA.....GGGGAGTATCATTCAAGAAC.....AAGTTTTTTTCAACACAGAA.....
243 .....
244 .....
245 .....
246 .....
247 .....
248 .....
249 .....
250 .....
251 .....
252 .....
253 .....
254 //
255 >PHAS84 excise_beg:18430364 excise_end:18430673 excise_len:310 Phased_ratio:0.573 Phased_num:4 phased_abun:105
256 TGGATATGCTTTTCAACAGGAGCAGGATGACAAAGCTGCTACTCTTCAAAGCAATAACAAATCTCAGTTGATCATTCTTACCTCATTCTAGTGGTTTACTTTTAAAGTATCAAGCATATCGATTAGTCAACAATCCATTATTTAAAAGTTGAAAACCTGTAACATTAGCATCCAGACACAGCCTAGTAGACATTTCAACAAAAATAGAGATCCGAGAGCTTCTTTCTGCTTTAGTTCATTGACCTCATAACACCATGTCACCTGATTGTAGATACTGATTC
257 ACCCTATAACGAAAGTTGTTCTCGCTCAGCTGTTTTCGATATGAGGTTTGAAGTCAACTAAGTAAGAATGGAGTAAGTCCACCAAAATGAAAATTCGATAGTTGCTGATAGCTAAATCAAGTTGATGATTAATAAATTTCAACTTTTACATTTGTAATCGTAGGCTGTGTGCGGATCATCTTAAAGTATTTGTTTTTACTCTAGGCTCTCGAAGAAAAGAGCGAAATCAAGTAACGGAGTATTGGTAAACAGTAACTAACTATCTTAGACTAAG
258 .....TCGTTATGTTTGAAGTCAA.....CAGTTGTTAGGTAATAAAT.....TCGTAGGCTGTGTGCGGATCA.....ATCTTAGGCTCTCGAAGAA.....
259 .....
260 .....
261 .....
262 .....

```



```

394
395
396 //
397 >PHAS75 excise_beg:705061 excise_end:705328 excise_len:268 Phased_ratio:0.493 Phased_num:4 phased_abun:2433
398 .....TAGCTTGCAGTATAGAACAAA.....
399 .....TTTCAATATACATAACGACTA.....
400 AATATTTTCTAATGAGGCAATAGTATGATGAGTTTCAACAGAAACAAAGTATTGATACGAGGTAACAATCCTTGCTTATCTTCTAGCTTGAAGTATAGAACAATTTTTCATATATACAGGACTACTCATCACCGGGACAACATGTAAACAATGACACCTTGCACGTGAAAAATTGACAACTATGTCAAAAATATATGCCACAAATGAGTCAAGAAAAATGTCTCAATATATAGCTTAACTAGGACAGAAGTACCACAAGA
401 TTTCAAAAGATTACCTCCGATCACTACTCAAGTAGTCTTAGTTAGTTCCTAATTTGCCCATGTTAGGACGAGATAGAGATCGAACTGCATATCTGTATTAAGTATATAGTATGTGCTGATGATGGCCCTGTGTACATTTGGTACTGTTGGGAGCGTGCATTTTAACTGTTGTAGTACAGTTTATAATACGGTGTGTTACTACAGTCTTTTTCAGGAGATATAAAATCGAATTGGATCCTGCTTCAATGGTGTCT
402 .....CCCATGTTAGAACAGATAG.....
403 .....CAGTTTTATAATACGGTGT.....
404
405
406 //
407 >PHAS52 excise_beg:37335120 excise_end:37335597 excise_len:478 Phased_ratio:0.367 Phased_num:14 phased_abun:1408
408 .....TCGCAGTTCGGATAAGTGGC.....
409 .....CAAAGGAAAAGTCCAGTGC.....
410 AATATCCAGTAAATGAGTCCAGTCCGACCGGACCACTTCAAGGGAAACAAATAGCACTATGTCAGTATGAGAACTGAAAGCGAGCCGCCCATAACTGCGCAGTTCGACGTAATTTTCCATAATTGTCACTGATCAACGAGGAGGTTGCGTTTGGTAAGTGGCCCGGTGGACAAACCCCTGCGAAAGAAAGTCCAGCTCTGACTGGAACTGCAACCCGTTGGTTGGTTGTTAAATTTACAAATGATACCAAAATTTACAGTGGCCCTGTTTCATATAGTGGCCCTTCTTCAATCTGTGACGAA
411 TGTATGGCTAATTAAGTCTAGGTAGGCTGTGCCTTGTGTAGTCCGCCCTTTTGTATCTGGTATACACAGTCCCTATCTTACACTTTGCTCTGTCCGGATATTGACCGGTCAACGGTCATTAATAGGTATAACAGTGGACTTAGTTGCTCTTCAGCGTCAAGACTATTCACCGCCGCACTTGTGGCGAGCTTTCTTTTCCAGGTCGAGACTAGCACCTGAACTGAGCTGGTGCACCAACCTTCAAAATTTAAAGTTTACTATGGTTTAAATGTCAAGGACAAAGATATATCACAGCGTAAGGAAAGTATGACACTGCTT
412 .....CTGGTATACACAGTCCCTAT.....
413 .....AGTCGACTTAGTTGCTCTTCT.....
414 .....CCAGCGTCAAGACTATTAC.....
415 .....CGGCCGCACCTTGTGGCGA.....
416 .....CGGTTCTCTTTCCAGTTCGA.....
417 .....TTAAATGTTTACTATGGTTTA.....
418 .....AATGTCAAGGGACAAAAGTAT.....
419 .....ATCACAGCGTAAGGAAAAGT.....
420 .....AAGCACTGCTT.....
421
422
423 //
424 >PHAS15 excise_beg:37325903 excise_end:37326401 excise_len:499 Phased_ratio:0.854 Phased_num:11 phased_abun:34411
425 .....TGAAAAGGAATGTCACACTA.....
426 .....TAGAAAACAGGGCACTGTA.....
427 .....AGCTGGACCTTTTCTTTGGC.....
428 GCTGCGACCCTGTCTTCTTTCAATGTTCAATTGTTCTTCTGTCCTCTGTATCCGCTATCCCAATGATTTGGTTCCTTTTGCTGCTCCTTGAATGTTTGACCAATTAATATCTTTGATCTGTGTTCAITGGATTTGTTTCCAGAAATAAGAAAGGAAATGTGCACACTATAAAGAAACAGGGCACGTAAATTTGGTATCAGCTGFAAATTTAACATCCACAGCGAGCTGGTGTGCAAGTTCAGACTAGCAGCTGGACCTTTCTCTTTGCGAGGGCTGTCCACCGGCGAGCACTTCCAGACTGCACCTCTCTCCTCT
429 CGACGCTGGAGACAGAAAGTCAAGTAAACAAGGAAGACAGAGGAACATAGCGATAGAGTAACAAACAAGGTAAGAAACGAGCAGAGGAACCTTTACAACAAGTAAATTAAGAAAGACTGAGCAAGTAACTCAAACAAGTGTCTTACTTTTCCATCACGTGATATACTTTTGCCCGGTGACATTTAAACCATAGTGGACATTTAAATGGTAGGTTGCGTGCACACAGCTCAAGGTGTAATCGTGCACCTGGAAAAGGAAACGGTCCGCGACAGGTGGCGGTGGTGAATAGGCTTTGACGTTGGAGAAGGAGGA
430 .....CGCATAGAGTAACAAAC.....
431 .....TTTAAACCATAGTGGACATTT.....
432 .....AAATTTGGTAGTGTGGTTCGA.....
433 .....CCACAGTTCAGGTGTAAT.....
434 .....CTGACCTGGAAAAGGAAAC.....
435 .....CGGTGAATAGGCTTGGAGT.....
436
437 //
438 >PHAS73 excise_beg:491972 excise_end:492344 excise_len:373 Phased_ratio:0.614 Phased_num:4 phased_abun:863
439 .....TTTGGATTGAGCAACAACAG.....
440 .....AAGGTGATTACTCGGACAA.....
441 .....AGAGATTGGTTTGGACTA.....
442 .....TTAAACAAAGTTCGACTTTGTTA.....
443 TTCCCGGTTGGAATGGAAGATTAATTCATGCAATTGGCCGAAAATGTGCTATTAGTTTTGAAAAAACTGTGCATACCAATCGTTACAGTAGAGATAGAGTAGGAGTGATTACTGCGGGACAGGATTTGAGGAGATATGGTATTTGTCACCGCTCCTCCGGAGTCTTAAAGCGTGGTCTATCAGGTCTTTCCAGAGTTTCTTCCAGAAAGTCTCTCAACGAAAGTATGAGATTTGCGACTATTTAAACAAAGTTCGATTGTTATCCCGTAAAGAAATTTGGTTTGGATAATGCATTGTTATCCCTTAAGAAAGTTCGATG
444 AACGGCCACCTTTACTTTCTAAATTAAGTAGCTAACCGGCTTTTACACGGATAATCAAACTTTTTTGACAGTATGTTAAAGCAATGTCATCTCATCTTCACTTCCACTAATGACGCTTGCATAAACTCCCTCTATACATAACAGCTGCGGAGGAGCCTCAAGATTTCCGACCAAGATAGTCCAAGAAAGTCTCAAAGGAGTTGCTTTGGATCTATGTATTTCTTCAACCAAACTGATAATTTGTTTCAACGTAAACAATAAGGCATTTCTTAAACCAAACTTATACGTAAACAATAAGGAAATTTCAACGTAAC
445 .....AACTTTTTGGACAGTATGGT.....
446 .....CTCAAGATTTGCACCAAGAT.....
447
448 //
449 >PHAS85 excise_beg:29736845 excise_end:29737175 excise_len:331 Phased_ratio:0.306 Phased_num:5 phased_abun:640
450 .....AAGGTGATTACTCGGACAA.....
451 .....AGAGATTGGTTTGGACTA.....
452 .....TTAAACAAAGTTCGACTTTGTTA.....
453 TTCCCGGTTGGAATGGAAGATTAATTCATGCAATTGGCCGAAAATGTGCTATTAGTTTTGAAAAAACTGTGCATACCAATCGTTACAGTAGAGATAGAGTAGGAGTGATTACTGCGGGACAGGATTTGAGGAGATATGGTATTTGTCACCGCTCCTCCGGAGTCTTAAAGCGTGGTCTATCAGGTCTTTCCAGAGTTTCTTCCAGAAAGTCTCTCAACGAAAGTATGAGATTTGCGACTATTTAAACAAAGTTCGATTGTTATCCCGTAAAGAAATTTGGTTTGGATAATGCATTGTTATCCCTTAAGAAAGTTCGATG
454 AACGGCCACCTTTACTTTCTAAATTAAGTAGCTAACCGGCTTTTACACGGATAATCAAACTTTTTTGACAGTATGTTAAAGCAATGTCATCTCATCTTCACTTCCACTAATGACGCTTGCATAAACTCCCTCTATACATAACAGCTGCGGAGGAGCCTCAAGATTTCCGACCAAGATAGTCCAAGAAAGTCTCAAAGGAGTTGCTTTGGATCTATGTATTTCTTCAACCAAACTGATAATTTGTTTCAACGTAAACAATAAGGCATTTCTTAAACCAAACTTATACGTAAACAATAAGGAAATTTCAACGTAAC
455 .....AACTTTTTGGACAGTATGGT.....
456 .....CTCAAGATTTGCACCAAGAT.....
457
458 //
459 >PHAS19 excise_beg:38677752 excise_end:38678040 excise_len:289 Phased_ratio:0.363 Phased_num:4 phased_abun:2614
460 .....CATGCTAATGATACAGAGCG.....
461 .....TTAAGGCCAGGAGCGCATGCG.....
462 .....CGGTGCACACTAGGGCGGAC.....
463 AATGCCCGGACTACTTTTGTAAATCACTACCAATCCCGAGGCCAACGTAATAGGACCGAACTCCTATAATGTTATCCCATGCTAATGTATACAGAGCTAGGCTTGGTTAGAGCACTAAATTTTAAAGTAAACAGCGGTGAGGACGACCCGGACAATTAAGGCCAGGAGCGCATCGCGACAGAAAGGCAAGACGATCGGTGCACACTAGGGCGGACAGGCGAGCTCATCCAAAGTCCAACTACGAGATTTGGATCATCCACTAATAAATTTCC
464 TTACGGGGCTGATAGAACAATTAGTAATGAGGTAGGCGCTCCGTTGCAATTTCCGCTTTAGGATATTACAATAGGTAAGGTATACATATGTCTCGCATCGAAAGAACTCTGTTGAGATTAATAAGTTTTCATGTGCCACCTCCGTCGTGGCCTGTTAATTCGGCTCTCGCTAGCGGTGTCTCCCTGTCTGTAGCCAGTGTGGATCCCGCCTGTCCGGTGAATTTAAATGCTTTAACCCTTCCGCTGCTCGCTAGCGGTGTCTCCCTGTCTGTAGCCAGTGTGGATCCCGCCTGTCCGGTGAATTTAATGCTTTAAAGTGT
465 .....TGGCTTTAGGATAATTACAATA.....
466
467 //
468 >PHAS88 excise_beg:9815931 excise_end:9816387 excise_len:457 Phased_ratio:0.307 Phased_num:6 phased_abun:103
469 .....TAAGGCCACAGGAGTTGATAA.....
470 .....ATACGCAATTTCAACAGATT.....
471 .....AGAAAGAATATTGACATTGA.....
472
473 //
474 >PHAS26 excise_beg:18740259 excise_end:18740610 excise_len:352 Phased_ratio:0.647 Phased_num:5 phased_abun:10225
475 .....CGGCGGAGTCTAAAGCAA.....
476 .....AAGGTGATTACTCGGACAA.....
477 .....AGAGATTGGTTTGGACTA.....
478 .....ATGTTGGAATGATGACTATA.....
479 .....TGGGAAGTAAGTCACTGTA.....
480 .....GAATCTGCTAGTGAAGACTC.....
481 .....TTGGGCTTTA.....
482
483 //
484 >PHAS47 excise_beg:53108590 excise_end:53109361 excise_len:772 Phased_ratio:0.460 Phased_num:17 phased_abun:1248
485 .....AAGAGATTGGCTATTGACT.....
486 .....ATGTGGGAATGATGACTATA.....
487 .....TGGGAAGTAAGTCACTGTA.....
488 .....GAATCTGCTAGTGAAGACTC.....
489 .....TTGGGCTTTA.....
490
491 //
492 >PHAS75 excise_beg:705061 excise_end:705328 excise_len:268 Phased_ratio:0.493 Phased_num:4 phased_abun:2433
493 .....TAGCTTGCAGTATAGAACAAA.....
494 .....TTTCAATATACATAACGACTA.....
495 AATATTTTCTAATGAGGCAATAGTATGATGAGTTTCAACAGAAACAAAGTATTGATACGAGGTAACAATCCTTGCTTATCTTCTAGCTTGAAGTATAGAACAATTTTTCATATATACAGGACTACTCATCACCGGGACAACATGTAAACAATGACACCTTGCACGTGAAAAATTGACAACTATGTCAAAAATATATGCCACAAATGAGTCAAGAAAAATGTCTCAATATATAGCTTAACTAGGACAGAAGTACCACAAGA
496 TTTCAAAAGATTACCTCCGATCACTACTCAAGTAGTCTTAGTTAGTTCCTAATTTGCCCATGTTAGGACGAGATAGAGATCGAACTGCATATCTGTATTAAGTATATAGTATGTGCTGATGATGGCCCTGTGTACATTTGGTACTGTTGGGAGCGTGCATTTTAACTGTTGTAGTACAGTTTATAATACGGTGTGTTACTACAGTCTTTTTCAGGAGATATAAAATCGAATTGGATCCTGCTTCAATGGTGTCT
497 .....CCCATGTTAGAACAGATAG.....
498 .....CAGTTTTATAATACGGTGT.....
499
500 //
501 >PHAS52 excise_beg:37335120 excise_end:37335597 excise_len:478 Phased_ratio:0.367 Phased_num:14 phased_abun:1408
502 .....TCGCAGTTCGGATAAGTGGC.....
503 .....CAAAGGAAAAGTCCAGTGC.....
504 AATATCCAGTAAATGAGTCCAGTCCGACCGGACCACTTCAAGGGAAACAAATAGCACTATGTCAGTATGAGAACTGAAAGCGAGCCGCCCATAACTGCGCAGTTCGACGTAATTTTCCATAATTGTCACTGATCAACGAGGAGGTTGCGTTTGGTAAGTGGCCCGGTGGACAAACCCCTGCGAAAGAAAGTCCAGCTCTGACTGGAACTGCAACCCGTTGGTTGGTTGTTAAATTTACAAATGATACCAAAATTTACAGTGGCCCTGTTTCATATAGTGGCCCTTCTTCAATCTGTGACGAA
505 TGTATGGCTAATTAAGTCTAGGTAGGCTGTGCCTTGTGTAGTCCGCCCTTTTGTATCTGGTATACACAGTCCCTATCTTACACTTTGCTCTGTCCGGATATTGACCGGTCAACGGTCATTAATAGGTATAACAGTGGACTTAGTTGCTCTTCAGCGTCAAGACTATTCACCGCCGCACTTGTGGCGAGCTTTCTTTTCCAGGTCGAGACTAGCACCTGAACTGAGCTGGTGCACCAACCTTCAAAATTTAAAGTTTACTATGGTTTAAATGTCAAGGACAAAGATATATCACAGCGTAAGGAAAGTATGACACTGCTT
506 .....CTGGTATACACAGTCCCTAT.....
507 .....AGTCGACTTAGTTGCTCTTCT.....
508 .....CCAGCGTCAAGACTATTAC.....
509 .....CGGCCGCACCTTGTGGCGA.....
510 .....CGGTTCTCTTTCCAGTTCGA.....
511 .....TTAAATGTTTACTATGGTTTA.....
512 .....AATGTCAAGGGACAAAAGTAT.....
513 .....ATCACAGCGTAAGGAAAAGT.....
514 .....AAGCACTGCTT.....
515
516 //
517 >PHAS15 excise_beg:37325903 excise_end:37326401 excise_len:499 Phased_ratio:0.854 Phased_num:11 phased_abun:34411
518 .....TGAAAAGGAATGTCACACTA.....
519 .....TAGAAAACAGGGCACTGTA.....
520 .....AGCTGGACCTTTTCTTTGGC.....
521 GCTGCGACCCTGTCTTCTTTCAATGTTCAATTGTTCTTCTGTCCTCTGTATCCGCTATCCCAATGATTTGGTTCCTTTGCTGCTCCTTGAATGTTTGACCAATTAATATCTTTGATCTGTGTTCAITGGATTTGTTTCCAGAAATAAGAAAGGAAATGTGCACACTATAAAGAAACAGGGCACGTAAATTTGGTATCAGCTGFAAATTTAACATCCACAGCGAGCTGGTGTGCAAGTTCAGACTAGCAGCTGGACCTTTCTCTTTGCGAGGGCTGTCCACCGGCGAGCACTTCCAGACTGCACCTCTCTCCTCT
522 CGACGCTGGAGACAGAAAGTCAAGTAAACAAGGAAGACAGAGGAACATAGCGATAGAGTAACAAACAAGGTAAGAAACGAGCAGAGGAACCTTTACAACAAGTAAATTAAGAAAGACTGAGCAAGTAACTCAAACAAGTGTCTTACTTTTCCATCACGTGATATACTTTTGCCCGGTGACATTTAAACCATAGTGGACATTTAAATGGTAGGTTGCGTGCACACAGCTCAAGGTGTAATCGTGCACCTGGAAAAGGAAACGGTCCGCGACAGGTGGCGGTGGTGAATAGGCTTTGACGTTGGAGAAGGAGGA
523 .....CGCATAGAGTAACAAAC.....
524 .....TTTAAACCATAGTGGACATTT.....
525 .....AAATTTGGTAGTGTGGTTCGA.....
526 .....CCACAGTTCAGGTGTAAT.....
527 .....CTGACCTGGAAAAGGAAAC.....
528 .....CGGTGAATAGGCTTGGAGT.....

```





```

656 .....TGAGGAATTGGAGCATCTCA.....
657 .....TTGGCAACATCTCATCACC...
658 CACTAAACCTTGCTTACAATGACTTTTATCCTTCGATCCACAGAACATTAGCCAATTGAGGAATTGAGGCATCTCAACCTTTCTGATGCTTGGTTCAAGGGAAAAATCCCAACAGAAATATCATACCTTCCAAATTTGGTTTCACTTGATCTTTCTAATAGTTATCATAGATTACAACCTTGATGAGAGAACATTTGAAACAATGCTTCAACAATGACAAATCTTGAGTTACTAGCTCTCTCTTTGGCAACATCTCATCACCATTCCAAATAGCCGCTTCCAGCTTCAATCTCCACACACTAAACCTTTATAACGATTACTTCTCTCC
659 GTGATTTGGAACGAATGTTACTGAAATAGGAAGAGCTAGGGTGTCTTGTAAATCGTTAACTCCTTAACTCCGTAGAGTTGGAAGACTACGAACCAAGTTCCCTTTTAGGGTGTCTTTATAGTATGGAAGGTTAAACCAAGTGAACAGTAGAAGATTATCAATAGTATCTAATGTTGAACCTCTCTCTGTTAACTTTGTTACGAAGTGTGAACTGTTTAGAACTCAATGATCGAGAGAGAACCGTTGAGAGTAGGGTAAGTAGGGTTATCTCGGAGAGGTCGAAGTAGTAGAGGTGTGTGATTGGAAATATTGCTAATGAAGGAGG
660 .....TTATAGTATGGAAGGTTAAA.....
661 .....TTACGAAGTGTGAACTGTTT.....
662 .....GAAGTCCGAAGTAGTAGAGGT.....
663 .....
664 .....
665 .....
666 //
667 >PHAS18 excise_beg:3097032 excise_end:3097299 excise_len:268 Phased_ratio:0.977 Phased_num:6 phased_abun:379
668 .....ATCAATAGACTTGTACTACT.....
669 AATAATGTAAGAACTCAAAAAACTTACCTCCACTTTTCAACCGATCAATAGGTGCACTCTTAGTCTTGAATATCAAAAGGACTCCACAACTCATCAATAGACTTGTACTACTTCCAGCTTCCAAATCTCAATCTGTATGCCGCTTACGGGACCTTTTCACATCTCTCTACTCATCGTTTCCACTTCCAAAATTCCTCTACTGTCCGAGGAGATGACACAGATTGACAAATAATTTTTTTCAGATTTT
670 TTATTAACATTTCTGAGTTTTTTGTGAATGGGAGTGGAAAGTTGGCTAGTTATCCAGCTGAGAATCAGGAACCTTATAGTTTTCTCGAAGGTGTTAGTAGTATATCTGAACGATGTAAGGCTGAAAGTTTAGAGTTAAGACTACGGCGGATATGCCGTGGGAAAGTGAAGAGAGTGAGTAGCAAAAGTTTAAAGGAGATGACAGCTCCTCTCTACTGTGTCTAAACTGTTATAAAAAAGAGTCTAAAA
671 .....CGTGAGAATCAGGAACCTTAT.....
672 .....AGTTTTCTCGAAGGTGTTAGT.....
673 .....GAAGTCCGAAGTTTAGGAGT.....
674 .....CTGGGAACTGTAGGAAAGT.....
675 .....GAGTAGCAAGGTGAAGGTTT.....
676 .....
677 .....
678 //
679 >PHAS58 excise_beg:844677 excise_end:845112 excise_len:436 Phased_ratio:0.306 Phased_num:13 phased_abun:1421
680 .....TCCGAAAAATTTGGGCATAGCC.....
681 .....AGTCCTTCCAGCTCGAGTTC.....
682 .....
683 .....
684 GAGCTACCTCTCACTAACTGTTTTTTAGCCAAATCTCTCATTTTGTAGCATTTTTCTAATCTCATCACCTTTTCTCTCCATTAACCAAAAACAACACTCTCTCTTTTGAACAATCTCAACATGCTTCTTCTTCTTGAACAATCTCAACATGCTTCCACCAATCTCCCATATCTCCTCAATAACTTTGATCCGTCAATTTGATCCGAAAATTTGGCATAGCCACCTTGGCACGCCGAGGCTTAGTCTTCCAGCTCGAGTCCATCCACAGTGAATACAAAACAACCAATGGCTTGAATTCGCTAGCGTCTCGAGCTGATTGCACCATGACAAA
685 CTCGATGGAGGAGTATGACAAAAAATCGGTTTAGAGAGTAAACATCTAAAAAGATTAGAGTAGTGAAGAAAGGAGGTAATGAGAAAAATTTGTTTGTGTGAGAAGAGAAACTGTTAAGGATTTGACAGTAGGTTAATCCAGATGTTGTTAGAGGTATAGAGTAGTTATTTGAACGTAGGCAATAACTAGGCTTTAACACCGTATCGGTGTAACCGTCCGAAATCAGGAAGTTCGACCTAAGTAGGTTCACTCAATGTTTTTGTGTACCGAACTAAGCATCCGAGAGCTCGACTAAGTGTACTGTGTT
686 .....AAGATTAGAGTAGTGAAGAA.....
687 .....GAGGAAGTAAATGGAGAAAA.....
688 .....GTTAGAGGTATAGAGTAGTT.....
689 .....ATTGAAACGTAGGCACTAAA.....
690 .....CTAGGCTTTTAAACCGGTATC.....
691 .....AATCAGGAAGTTCGAGCTCA.....
692 .....AGGTAGGTGTCACCTCAATGTT.....
693 .....GATCCGAGAGCTCGAATAAG.....
694 .....TGTTACTGTGTT.....
695 .....
696 .....
697 .....
698 //
699 >PHAS01 excise_beg:88580778 excise_end:88581066 excise_len:289 Phased_ratio:0.600 Phased_num:5 phased_abun:464
700 .....TCCGAGGCTTTGGACGAGT.....
701 ATGAGCAGCTTCTCATCCGAGCTCTCTCCGAGTGTCTCTCGGTTTGTGACGATCTCTCGAAGCTTTTCCGAGCTTTGGACGAGTATGAGCAGCTTCTGAGCAGCTTCTTTATAGCAGATGACAGAGCAAAATTCAGCTGATTTTACAAAATCACTTTTGGAAATCAAGCTTTCAAGCTTCTATAGCTATTACTTATGAT
702 TAAGTCTGAAACAGTAGGGCTGTAAAGACGGCTTCACCGTTTTTCAGTAGACCAAACTGCTCAGAGCTTCCGAAAGCTCCGAAACTGCTACTCTCTGCTTAACTCGACACCGCACTTAAACACTGATGGTGGTTCGCCGAACTTGTGAGAGGGGCTCGTGGTAACTCTGTGTCGACGAAAATACTGCTCTAGTCTCTGTTTAAAGTGCACCTAAATGTTTTTATGTAACACCTTCAGTACTGATAAGTTCGATAATGGAACTA
703 .....AAAATGCTCAGACCTTCCA.....
704 .....AAAGTCTCCGAACTGCT.....
705 .....GCTGTGCTGACGAAAAATACT.....
706 .....CGTCTAGTCTCGTTAAAGT.....
707 .....
708 .....
709 //
710 >PHAS12 excise_beg:423568 excise_end:424045 excise_len:478 Phased_ratio:0.944 Phased_num:19 phased_abun:46628
711 .....CTCTTATAGCTATGGCAAGAA.....
712 .....ATCACTACTCTCCCAATATC.....
713 .....TCTTTGCTCTAAGGCCACATA.....
714 .....TCAAATGTTTGTGTTGATTG.....
715 .....TAATGATGATTAACAACCCG.....
716 .....AACCAAACTTCTTTCTC.....
717 .....TTGTTAAGGACTTAATCGGC.....
718 .....TTAGATGATCCAGCTATCAA.....
719 .....
720 .....
721 .....
722 .....
723 AAAAAATGATATGCTTAACTTCAATGTTTAACTTAAGCTAAGTAGAGAAATGGAGAACTTGCCCTTATAGCTATGGCAAGATGCAATGCTCTCTTATGTCAGATTTCATCTGCTTCACTACTCTCCCAATATCAACTCTCTTCTTTAAAATACAAGATTTTGAATCTTTAGAAATCTTAGAATATCTAGCAACCAATTAGTCTTTGCTTAAAGCCACATATCAAATGTTTGTGTTGATGTTAATGATGATTAACAACCCGAAACCAACCACTCTTTCTCTGTTAAGGACTTAATCGGCTTAGATGATCCAGCTATCAAGAAATATA
724 TGTTTTACATATACGATATGAAAGTACAAATCGATCTCTCTTCACTCTTGAACGGAGAATATCGATCCGTTTCTCAAGTATGACAGAGGAATAACAGCTCTCAAAGTAAAGCAAGTAGTATGAGAGGGTTATAGTTGAGAAGAAAGAAATTTATGTTCTAAAGAACTTAGAATCTTATAGATCGTTGTTAATCAGAAACAGATTCGGGTGATAGTTTACAAACACAACCTAATCTACTAATTTGTTGGCTTGGTTGGTTGAAGAAGAGAAATCTCTGAGATTAGCGAATCTACTAGGTGAGTATGTTTATAAT
725 .....TTCAACGTATGACAGGAATA.....
726 .....ACAGTCTCAAAGTAAAGCA.....
727 .....AGTAGTATGAGAGGTTAT.....
728 .....AGTTGAGAAGAAAGAAATTT.....
729 .....ATCTTATAGATCGTTGGTTAA.....
730 .....TCGAAACGAGATTCGGGT.....
731 .....ATAGTTTACAACCAACTA.....
732 .....GCTTGGTTGGTTGAAGAAG.....
733 .....
734 .....
735 //
736 >PHAS07 excise_beg:356043 excise_end:356919 excise_len:877 Phased_ratio:0.606 Phased_num:33 phased_abun:19615
737 .....GAGAAAAATCAGCAAAATGGCG.....
738 .....AGAATTCAGGATGAGATTGCA.....
739 .....AGGTTAATGGATCAGAAGCT.....
740 .....GATGTTTGAAGGCTCTTGAA.....
741 .....CTAGAGAACTTGGAAATTCCT.....
742 .....
743 .....
744 .....
745 .....
746 .....
747 .....
748 .....
749 .....
750 .....
751 .....
752 .....
753 .....
754 .....
755 GTCATGGCAGCTTGGAGATGACGAGGTTGCTATTTATGGGATATGGGTATGGGTGGAGTTGGTAAAGACCACTGACTGAGAAAATCAGACAAAATGGCGAAAAAGAAAGTTGTTTAAAGATGTTGTCATGTAATGTCAGTCAACAAATAGACTTTAAAAGAAATCAGGATGAGATTGCAGGAGGAGTTGGGCTGACATTAAGAGGGGATGATTTGTGAGTCTGTGAGATCTGCTGCTGACAAAGTTAATGGATCAGAAGCTGCATCTTTATAATCTTGGATGATGTTTGAAGGCTCTTGAATAGAGAACTTGGAAATCTCTAGTGTGACA
756 CAGTACCGTGAACCTCTACTGCTCCACGATAATAACCTATACCATACCCACTCAACCTTCTGTTGTGACTGACTTTTTAGTCTGTTTACCGTTTTTCTTCCAACAAAATTTCAACACAGTACCATTACAGTCACTTTTATCTGAAATTTCTTAACTACTCTAAGTCTACTCTAACGCTCTCAACCGGCTGTAATCTCCCTACTAAACACTCAGCACTCTAGACGACGATGTTCAATTAACCTGTTGTCAGGTTAGGAATTTAGAACCTACTACAACCTTCGAGAACTTGATCTTTTGAACCTTAAAGATCAACATGCT
757 .....CTCAACATCTGTGTGACT.....
758 .....GACTCTTTAGTCTGTTTAC.....
759 .....GCTTTTTCTTTCCAACTA.....
760 .....TTCTACACAGTACCATTAC.....
761 .....AGTCAGTTGTTTATCTGAAAT.....
762 .....TTTCTTAACTCTACTTAA.....
763 .....GTCTCTCAACCGGCTGTA.....
764 .....ATCTTCCCTACTAAACACT.....
765 .....CAGCACTCTAGACGCGAT.....
766 .....GTCCAATACCTAGTCTTGT.....
767 .....CAGGTAGGAATATTAGAACC.....
768 .....
769 .....
770 .....
771 .....
772 .....
773 .....
774 .....
775 //
776 >PHAS27 excise_beg:1182678 excise_end:1183680 excise_len:1003 Phased_ratio:0.500 Phased_num:20 phased_abun:2880
777 .....AACTCGAACAGTGAATAA.....
778 .....TCACTTAGGCATAGCTGGCGA.....
779 .....AGAAGATCATGAATTTGCAA.....
780 .....
781 .....
782 .....
783 .....
784 .....
785 .....
786 .....

```

```

787 GGTATTACACAAGAAATCGTAATATACTAGTATACGCTCCAAACCTTAAGCAACTGAACTCTGAAACAGTGGAAATAGCTTTAAATATGCGTGAATAAAGGTACGAGTTATACCTGCTATGCTGCTGCGCTGGACGATAAAGTCTCTCTTTATGTTTATGCGAGACTATCACTCGCGCTGATCATCTATTACTTCTACTGAAGACACGACGACATCCCAATGATACATGCACAACATTTTCAGTATGAGTTTCACTTAGGCATAGCTGGCGAAGAAATCATGAATTTTGAACCTTCTCATCTCCATTTAGCACCTTTGTTTAC
788 CCATAATGTTCTCTTAGCATTATATGACTACTATGCGAGTTGGAAATCGTTGAACTTGAGACTTTGTCACCTTATTCAGAAATTTATAACGCACTTATTTCCATGCTCAATATGACAAATATAGTAAACGATACGCGACTGCTATTTGAACGAAGAAATACAATAACGCTGGATAGTGGAGCGGACTAGTAGATAATGAAGATGACTTCTGTGCTGCTGTAAAGGTAACTAATGACGTTGTAAAAGTCATCTCAAAGTGAATCCGATCGACCGCTTCTCTAGTACTTAAACGTTGAGAGATAGGAAGGTAAATCGTGAACAAATG
789 .....GACCTGCTATTTGAACGAAGA.....
790 .....GAAATACAAATACGCTGGAT.....
791 .....AATGAAGATGACTTCTGTGCT.....
792 .....GTGAACAAATG
793 .....
794 .....
795 .....
796 .....
797 .....
798 .....
799 .....
800 .....
801 .....
802 .....
803 .....
804 //
805 >PHAS61 excise_beg:3344921 excise_end:3345398 excise_len:478 Phased_ratio:0.470 Phased_num:7 phased_abun:2545
806 .....CAATTTCCCTCGATGACATGGT.....
807 .....TAGGATTTTATATACTAGGCA.....TCCATAGACGAATACCTCGCA.....
808 .....
809 .....TTGCTGTACGGTTCTGTGAT.....
810 .....
811 GCAAACAACATATCATAGGACCCATAATCATAAGCTCAAATTTATTTGGCAACTCCTTGAATTTCCCTGATGACATGTGTAGGATTTTATATACTAGGCAATTTAGTATTCAAGATCATTCCATAGACGAATACCTGCAATTTGCTTCTTTTATTTTGTTCGAAGAAGGCATAACAAGAATTTAAGCCGTGGACACCTGAAAAAGAGGAGATCTAATTAGCTGTCTTTTCACTTTTACAGTAAATTTTGTTCCTCAAAGAATAATGAAAAATCATAAGGATCTGAATCTTTGAAACGTTGTTGCTGTACGGTTTCTGATTAAGTTATAA
812 CGTTTGTGTATAGTATCTGGGATATTAGTATTCGAGTTTAAATAAACCGTTGAGGAACGTTAAAGGAGTACTGTACACATCCTAAAATATATGATCCGTAACAATCACTAAGTCTTAGTAGGATCTGTCTTATGGGACGTATAACGAACGAAAAATAAAACAAGTTCTCCGTTATGTTCTTAAAATTCGGCACCTGTGGACTTTTTCTCTCTAGATTAACTGCACAGAACAAGTAAAAGTGTCAATAAAAACAAGAGTTTCTTATACCTTTTAGTATCTCTAGACTTATAGAACTTTGCAACAACGACATGCCAAAGAACTAATTCATATT
813 .....ACGTTAAAGGAGTACTGTAC.....
814 .....ATCGACGAACAAAGTAAAAGT.....
815 .....
816 .....
817 //
818 >PHAS57 excise_beg:60064409 excise_end:60064886 excise_len:478 Phased_ratio:0.731 Phased_num:9 phased_abun:139
819 .....CTAGAAAAGACGCACTTGCC.....AGAGTGACTAAGCATTTCGAT.....CCTCATGTGCGAGGACTTGGCT.....TCATTCAGAAAGAGCTCCAG.....TACTTCTGTCTTAGAGTAT.....AAGTGGCTAAGTTAAGGCA.....
820 .....
821 .....
822 .....
823 .....
824 .....
825 .....
826 .....
827 ATAAACAATATTAACTGCGAAGAATCCAGTCTTCCCTATAATTTGGTATGGGGGACTAGGAAGACGACACTTGCCTAAATGATCTTCAATGATCAGAGAGTACTAAGCATTTCGATCCCAAATATGGGTTTGTGCTCAGATGATTTGATGAGAAGAGTTAATTAAGACAATTTAGGAAATTTGAAAGAAGTCTCTCTCATGTCGAGGACTTGGCTTCAATTCAGAAGAAGCTCCAGGAGTTATTGAATAAAAAACGATACTTGTCTGTAGATGATTTGGAATGATGATCTAGAGAAGTGGCTAAGTTAAGAGCAGTCTTAAATG
828 TATTGTTATAATTGCAACGGCTTCTTGAAGTTCAGAAGGATATTAAACATACCCCTGATCCTTTCTGCTGTGAACGGGTTACTAGAAGTTACTAGTCTCTCACTGATTCTGTAAGCTAGGGTTTATACCAAACACAGAGTCTACTAAAACCTCTTCCAAATTAATCTGTTAACCTCTTTATAACTTTCTCAAGAGGAGTACAGCTCTGAAACGGAATAAAGTCTTCTCGAGGCTCAATAACTTATTTTGTATGAAACGACGAATCTACTACAAACCTTACTACTAGATCTTCCACCGATTCAATTTCTGTCAGAAATTAC
829 .....GTCGAATTTAC
830 .....
831 .....
832 .....
833 //
834 >PHAS68 excise_beg:58953865 excise_end:58954258 excise_len:394 Phased_ratio:0.502 Phased_num:6 phased_abun:1047
835 .....TACTTTACAATCATGAAGCA.....AAAGGAAGCATTTTAGACAAC.....TCCTGATCGCAGTTAATCGA.....
836 .....
837 .....
838 .....
839 CTTTACCATATGTTGCTGCAATTAATTAATAAACACACACTTATGAGGTTATTGTGACTTTACAATCATGAAGCAACTTGAAGCTCCAAAAGTGAACAGTAATGTTGCTTTGTATGCATGACAAACCAAAATTTGTGCTCAGTTTCTCAAAGAATCCACTGTCAGTAAGTAAAAGGAAGCAATTTAGACAATTTTATCTCATGAGAAATGACTTTTTCTTCTGTGATATTGATGAGTCAAAAACCTTATCACCTCTTTTCAACTCAACAACGCGACCAACCAAGTAATCTTGTATCGAGTTAATCGGAATGTAGACCT
840 GAAATGGGTTACATAACAGACGTAATTAATTTTGTGTTGTAATAACTCAATAACACATGAATGTTAGTACTTTTCGTTGAACCTCCGAGGTTTTCACCTTGGTCATTACAACAGAAACATACGTAAGTCTTAGTGGTTTAAAACACACAGTCAAGAAAGTTTCTTAGTACAGGTCATTCTTTTCTCGTAAAATCTGTTGTAATAATAGACTCTTACTGAAAAAGGAACACGTATAACTACTCAGTTTTGAGAATAGTGGGAGAAAAGTTAGTTGTTGACGGTCTGGGTTACCTTAAGAACTAGCCTCAATTAGCCTTACATCTGGA
841 .....TTGGTCATTACAACAGAAACA.....
842 .....ACTGAAAAAGGAACAGTAT.....AGTGGGAAAAAGTTGAGTT.....
843 .....
844 .....
845 .....
846 //
847 >PHAS30 excise_beg:54580204 excise_end:54580912 excise_len:709 Phased_ratio:0.330 Phased_num:19 phased_abun:1254
848 .....TGCAGGAAGATCATTGTAGCT.....AAGAGTCTTCAGAGCTAAGGG.....
849 .....
850 .....
851 .....
852 .....
853 .....
854 .....
855 .....
856 .....
857 CCACAGATGAACGACTTGTCTTACTAAATGGATAATCTTGGGAAAAATGACACAGTAGGAAAAACATTCGTTTAAATGTCAGGAAGATGATGATGCTCAACATCAGCGCTGGTAATAATGTCATCTGTGGCAGCTCCCATATTTCACTTTTCAAATAACGTTTCCACTTCAACCTCTGATTTGGAGCGTAACATGCCAGCAAGACTTTCAGAGCTAAGGCGAGTCCCTTGCACCTAGCTGCAATTTGTTTCCGACCTTCAAGTCTGGATGTTCCATAGGATTCATGTTTCAAATGATGCTTTTAAATAAAGCAACAGAGGCTTCAATA
858 GGTGCTACTTGTGCTGAACAGAAATGATTTACTATTAGAAACCTTTTAAACGTGTATCCTTTTGTAAACGAAATTTACAGCTCTCTAGTAACTCGAGTTGTAGTCCGCAACATTATACAGTAAAGCAGCTCGAGGATATAAAGTAAAAGTTTATGCAAAAGTGAAGTTGGAGACTAAACCTCGCATTTGATGAGTCTCTCAGAACTCTGATTTCCGTCAGGAACTGAAATCGAGCTTAAACAAAAGCTGGAGAAGTTCAAGACTCAAGGTATCTAAGTACAAAAGTTTACGTACAGAAAATTTATTTCTGTTCTCCGAAAGTTAT
859 .....ATCCTTTTTGTAACGAATTT.....TACAGTAAAGCACCGCTCGAGG.....CGTCTCAGAACTCCGATTT.....CCGTCAGGAACTGAAATCGA.....AGTTCAAGACTTACAAGTAT.....CCTAAGTACAAAAGTTTACGT.....
860 .....
861 .....
862 .....
863 .....
864 .....
865 .....
866 .....
867 .....
868 .....
869 .....
870 .....
871 .....
872 //
873 >PHAS50 excise_beg:264321 excise_end:264861 excise_len:541 Phased_ratio:0.470 Phased_num:14 phased_abun:698
874 .....AAGACTTGTACTAACCATT.....TTCGGAGTTAAGAAGATA.....TTGATGATGCTGGGAACTA.....ATGGAAGTAGACTTATCTGTA.....
875 .....
876 .....
877 .....
878 .....
879 .....
880 .....
881 CAATTTGGAAATGCGCGATTGGGTAAAGCAACTCTGCTAACAGCTATTTCTGTACAGTTTGTGATCTCATTTTGTATGTCGTCACAAATGTTGATGTCGTCACAAATGTTGATATACAGCTAAAGACTTGTACTAACCATTTCTCGAGTGTAAAGAGGATATAGTTATCAGTATAAATACCAGGAATGAATAGCAGATAAGTTGCGTAACTTCTATTTGTCAGAGGTACCTTATCCTCATGATGATGCTGGGAACTACTGCATGATGAACTAATGCCATGCTTCTATGATGCCAATATGGAAGTAGACTTATCTGACAACTGCGCA
882 GTTAAACAACCTTACCGCCTAACCCATTCTGTTGAGAGCGATTGTCGATAAAGACTAGTCAACAACATAGATGTAACCTACAGGCAAGTGTACAAACACATAGATTTTATATATGTCATTTCTGAACAATGATTTGTAAGAGCCTCACAATTTCTTCTATATCAATAGTCACTATTGATGTTCTTACTTAATCGTCTATTCAACGCATTTGAAGATAAACAGCTTCCATGGAATAGGAGTAACTACTACAGACCTTTGATGACGTACACTTGTATACGGTACGAAGATACTACGGTTATACCTTCACTGAATAGGACTGTGACGGGT
883 .....AGTCAACAACATAGATGAAA.....ACTACAGGCAGTGTACAAC.....ATTCTGAACAATGATTTGTA.....TGGTCTTACTTAACTGCT.....ATGACGTACACTTGTATTA.....CGGTACGAAGATACTACGGTT.....CTGTTGACGGTT
884 .....
885 .....
886 .....
887 .....
888 .....
889 .....
890 .....
891 //
892 >PHAS28 excise_beg:51384504 excise_end:51385716 excise_len:1213 Phased_ratio:0.345 Phased_num:50 phased_abun:19905
893 .....TGATGCTTTTGAATAACGAA.....AGGGTTACTTCAAGAAATTA.....CTCATTTGACTTATATGTTGG.....TGACATCTTAAAGCTATA.....AAGGGAAGATTTCTTGTGG.....CCCTGGATGTTGTTGAATG.....ATAACTATAATGATGGGATG.....AAGGAGATAGGAAGTAAGA.....AGAATGTTGCCTCGATGATGG.....TAGCAGACATAAAGCTGGG.....AACTCTGTTT
894 .....
895 .....
896 .....
897 .....
898 .....
899 .....
900 .....
901 .....
902 .....
903 .....
904 .....
905 .....
906 .....
907 .....
908 .....
909 .....
910 .....
911 .....
912 .....
913 .....
914 .....
915 .....
916 .....
917 .....

```

918  
919  
920  
921 GTAAGACAACACTTCTAAAGGTTTCGTTTGAAGCTTGGTTTGTGTTTCCAAGGCATATGATGCTTTTGAATAACGAAAGGGTACTTCAAGAAATGACTCATTGACTTATATGTTGGTACAACTTAAAGCTATAGTCAATGAAAGAAAGCCGAAAGGGAAGATTTCTTGTTCGCCCTGGATGATGTGTGGAATGATACTATAATGAGTGGGATGACTTGAGAAATCTTCTGTACAAGGAGATATAGGAAGTAAGATCATTGTAACACGTAAGGAGAATGTTGCCTCGATGATGTTAGCAGAGCAATAAACGTGGGAACCTGTCTC  
922 CATTCTGTTGTGAACGATTCCAAGCAAACCTTCGAAACCAACAAAGGTTCCGTACTACGAAACCTTATGCTTTCCCAATGAAGTCTTTAACTGAGTAACTGAATATACAACTCTTAAAGTATTTGATATCCAGTTAACTTTCTTCCGGCTCCCTTCAAGAAACAACGGGACTACTACACACTTACTATTGATATTACTCACCTACTGAACTTTAGAAAGCATGTTCCCTATATCCTTCATTCTAGTAACATTGATGTGCATTCCCTTTACACCGGAGCTACTACCATCGTCTGTTATTTGCACCTTGAGACAAG  
923  
924  
925  
926  
927  
928  
929  
930  
931  
932  
933  
934  
935  
936  
937  
938  
939  
940  
941  
942  
943  
944  
945  
946  
947  
948  
949  
950  
951  
952 //  
953 >PHAS63 excise\_beg:50481440 excise\_end:50481875 excise\_len:436 Phased\_ratio:0.489 Phased\_num:8 phased\_abun:455  
954  
955  
956  
957  
958  
959  
960  
961  
962  
963  
964  
965  
966 //  
967 >PHAS32 excise\_beg:2719362 excise\_end:2719587 excise\_len:226 Phased\_ratio:0.572 Phased\_num:4 phased\_abun:276  
968  
969  
970  
971  
972  
973  
974  
975  
976  
977 //  
978 >PHAS86 excise\_beg:58951365 excise\_end:58951674 excise\_len:310 Phased\_ratio:0.330 Phased\_num:5 phased\_abun:283  
979  
980  
981  
982  
983  
984  
985  
986  
987  
988  
989 //  
990 >PHAS74 excise\_beg:704592 excise\_end:704880 excise\_len:289 Phased\_ratio:0.418 Phased\_num:5 phased\_abun:2440  
991  
992  
993  
994  
995  
996  
997  
998  
999  
1000  
1001 //  
1002 >PHAS14 excise\_beg:12309851 excise\_end:12310139 excise\_len:289 Phased\_ratio:0.599 Phased\_num:5 phased\_abun:1073  
1003  
1004  
1005  
1006  
1007  
1008  
1009  
1010  
1011  
1012  
1013 //  
1014 >PHAS82 excise\_beg:2700537 excise\_end:2700762 excise\_len:226 Phased\_ratio:0.422 Phased\_num:4 phased\_abun:938  
1015  
1016  
1017  
1018  
1019  
1020  
1021  
1022  
1023  
1024 //  
1025 >PHAS20 excise\_beg:2161869 excise\_end:2162199 excise\_len:331 Phased\_ratio:0.450 Phased\_num:7 phased\_abun:2026  
1026  
1027  
1028  
1029  
1030  
1031  
1032  
1033  
1034  
1035  
1036  
1037 //  
1038 >PHAS21 excise\_beg:2340887 excise\_end:2341322 excise\_len:436 Phased\_ratio:0.725 Phased\_num:8 phased\_abun:134  
1039  
1040  
1041  
1042  
1043  
1044  
1045  
1046  
1047  
1048





```

1311 >PHAS40 excise_beg:3821576      excise_end:3822410      excise_len:835 Phased_ratio:0.830      Phased_num:31      phased_abun:209390
1312 .....TTATGGAATACGAGTAGATAT
1313 .....TGATGTACATGGGATGGATTA.....
1314 .....CAACTTGATTAGAAAAACATTG.....
1315 .....CCAAAAACGGTCTTATGGAAT.....
1316 .....GCGAGTAGAGATTGTTGTA.....
1317 .....TATGTCTTCCTCCTTAAGTA.....
1318 .....CGACCATATG
1319 .....
1320 .....
1321 .....
1322 .....
1323 .....
1324 .....
1325 .....
1326 AGATGGAAAATGAAAATTCOAAATTACTATCCTGTGACTTTTTCCCAAAAACAGTCTTATGGAATACGAGTAGATATGTATGTACATGGGATGGATTAACAACCTTGATTAGAAAACATTGGACACAATACTTCAAACCTTCCAAAAACGGTCTTATGGAATGCGAGTAGAGATTGTTGACTTTCTCTCCCTGATGTCACATCTCATCTTCTATACCTATGAATATGTCCTCCTTAAAGTATGGGATCTTGAATATACTAATAATAACAATTAGGATTTCATTTTACCGACCATATATATATCTTTACAAATTTCAATTTACGCGACCATATG
1327 TCTACCTTTTACTTTTAGAGGTTAATGATAGGACACTATGAAAAAGGGTTTTTTGTGAGAATACCTTATGCTCATATAAATACATGTACCTACCTAAATGTTGAACAAATCTTTTGTAACTGTGTATGAAGTTTTGAAGGTTTTTCCAGAATACCTTACGCTCATCTTAACAACATGAAAGAGAGGGGACTACAGTTGTAGAGTAGAAGATATGGATACTTATACAGAAGGAGGAAATCCATACACCTAGAACTTATATGATATATGTTAATCCATAAAGTAAAGTGGCTGGTATATATAGAAAAGTGTAAAGTAAAGTCGCTGGTATAC
1328 .....TAACTACATGTACCTACCTA.....
1329 .....ATGTTGACTAATCTTTTGA.....
1330 .....ACCTGTGTATGAAGTTTGA.....
1331 .....AGGTTTTTCCAGAATACCT.....
1332 .....TACGCTCATCTTAACAACAT.....
1333 .....TAGAGTAGAAGATATGGATAC.....
1334 .....TCGCTGGTATAC
1335 .....
1336 .....
1337 .....
1338 .....
1339 .....
1340 .....
1341 .....
1342 .....
1343 .....
1344 .....
1345 .....
1346 .....
1347 .....
1348 //
1349 >PHAS39 excise_beg:61096825      excise_end:61098289      excise_len:1465 Phased_ratio:0.689      Phased_num:51      phased_abun:122160
1350 .....ATGATGTGTGTGTTAAACAG.....
1351 .....TTACGTACGAAAAATAGTTTG.....
1352 .....TTTTTTCCTCGCATAGCAA.....
1353 .....ACATATTCAGAGTAATGCAA.....
1354 .....TGGTTGGTCGATTGCACGAG.....
1355 .....GATAAGCGGGAAGATATGATT.....
1356 .....TTTGGAAAGTGGAGAAGCCAG.....
1357 .....TACTTGACAAAGTGGTAATC.....
1358 .....TGTTAGAAAT
1359 .....
1360 .....
1361 .....
1362 .....
1363 .....
1364 .....
1365 .....
1366 .....
1367 .....
1368 .....
1369 .....
1370 .....
1371 .....
1372 .....
1373 .....
1374 .....
1375 .....
1376 .....
1377 .....
1378 .....
1379 .....
1380 .....
1381 AGTACTATCGAGATATGGTATGGAGGGAGTAGAAAAGAAAACCGAGGAAGTGTTCGATGATGTTGTGTGTAACAGTTACGTACGAAAAAAGTTGGATCTTTTGGACAAAAAATGATAATCGAATTAATCATCAITTTTTCTCGCATAGCAAAACATATTCAGAGTAATGCAATGGTTGGTCGATTGCACGAGCACTGAATTCATGCAAAATTTGATAAGCGGGAAGATATGATTTTGGAAAGTGGAGAAGCCAGGTACCTATTTTTGCTTTGTTCTCTGTTTGGAGAAAATAAATACTTGACAAGGTGGTAACTCGGTAGAAAAT
1382 TCAATGATGCTTATACACCATACCTCCCTCATCTTCTTTGGCTCTTCAACAAGCTACTACAACAACAATGTCAATGATGCTTTTTTCAAACTTAGAAAACCTGTTTTTTGACTATAAGCTAAATAGTAGTAAAAAAGGAGCGTATCGTTTTGTATAAAGTCTCATTACGTTACAAAACAGCTAACGTCGTAAGTAACTAAGTAACTTTCGCCCTCTATACTAAAACTCCACCTCTTCGGTCCATGGATAAAAACGAAAACGAAGAACAACTCCTTTTATTTATGAACTGTTCCACCCATAGAACATCTTTA
1383 .....TCAATGATGCTTTTATTCAA.....
1384 .....ACCTAAGAAAACCTGTTTTT.....
1385 .....TCGTGACTTAAGTAGCGTTTA.....
1386 .....AACTATTCGCCCTTCTACT.....
1387 .....TCCATGGATAAAAACGAAACA.....
1388 .....TTATGAACTGTTCCACCCATT.....
1389 .....
1390 .....
1391 .....
1392 .....
1393 .....
1394 .....
1395 .....
1396 .....
1397 .....
1398 .....
1399 .....
1400 .....
1401 .....
1402 .....
1403 .....
1404 .....
1405 .....
1406 //
1407 >PHAS69 excise_beg:1188846      excise_end:1189218      excise_len:373 Phased_ratio:0.587      Phased_num:5      phased_abun:949
1408 .....GTGGTTAATAGAATTCGGCTT.....
1409 .....TCTATGACAATTAGAAATCTC.....
1410 .....TCAAGAAGCATTTGCTCTGA.....
1411 GACTTGCTATGAGGAGAAAATCAGGACACTGACATAATCAGCAATATCTTGAGCCGAGTGGTTAATAGAATTCGGCTTTTTATTGTTCATCGTTAGAAAATATTCTTTGTTATTGGTCCGAGCTTTTGTACTCCAAATATCATCTATGACAATTAGAAATCTCTACCTTCAGACCTTTATACGCAATCTCCATTAGTGTATCGCTCATTCTCTGCTTCCAGTAAGTGAAGAGCAACTCAAGAAGCATTGTTCTGTATTGTTCTTTGGAGATAGTGACCCATGCATGTTTATCAATCGAAGCAATATAGGAATCTCCAAAAACTT
1412 CTGACGATACCTCCTCTTTAGTCTGTTGACTGTTATGTCGTTATAAGAAGTCTGGCTACCAATATCTTAAAGCCGAAAATACAGTAGCAATCTTTATAAGAACAATAAACAGGGTTCCAAACATGAGGTTTATAGTAGATACTGTTAATCTTTAGAGGATGGGAAGTCTGGAAATAGCTAGAGGTAATCAACTAGTAGCGAGTAAGAAGCAAGGTCATTGACTTCTGTTGAAGTTCTCGTAAACAGAGACTAACATAAGAACCCTTATCACTGGGTACGTAACAATAGTGTGAGCTCTTGTATATCTTAGAGGTTTTTGA
1413 .....GAAGTTCTCGTAACAGAGA.....
1414 .....ACTGGTACCTCAAAATAGTT.....
1415 .....
1416 .....
1417 .....
1418 //
1419 >PHAS43 excise_beg:2501038      excise_end:2502355      excise_len:1318 Phased_ratio:0.332      Phased_num:34      phased_abun:6548
1420 .....TTGAGAAACATGCATGGGTCA.....
1421 .....AGAGACAGATGCTTCTTGAGG.....
1422 .....TCAACAATCAAGAAATGAGCA.....
1423 .....ATGATCAATTGATGGTTATG.....
1424 .....TGATAGAGTCTCAAGGGTA.....
1425 .....CTTGGACCAGAAATGCGAAGAA.....
1426 .....AAAGCCGAATTATACTAACA.....
1427 .....CTCGTCTCAAACATGTTGCTG.....
1428 .....
1429 .....
1430 .....
1431 .....
1432 .....
1433 .....
1434 .....
1435 .....
1436 .....
1437 .....
1438 GTATAGTAAAGCAACTCTTGTAGAAAAGTTTTGATAATCAATCATCTGTGATGATTGAGAAACATGCATGGGTACCAATATCTGAACAATAATAAGAGACAGATGCTTCTTGGGTTGCTTCTCAATTAGTGGAGTCAACAATCAAGAAATGAGCAATGATGAATTGATGTTATTGTGTATAGAAGTCTCAAGGGTAGGAGATTCTAATCGTATAGATGATCTTGGAGTACTGAGGCTTGGGCCAAATGCGAAGAAATTTCAAATGATAACAATAAAAAGCCGAATTTATACTAACCCACTGCTCAAAACATGTTGCTGATTAATGCAAG
1439 CATATCATTCTGTTGAGAACGATCTTTCAAACAACTAATAAGTTAGTAAGCACTAGTAACTTTGTAAGTACCGAGGTTATAGACTGTTATATTTCTGTCTAGCAAGAACTCCACGAAAGTTAATCACCAGTGTGTAGTTTCTTACTGTTACTACTTAACCAACAACATATCTCAGAGTTCCATCTCTAAAGATTAGCAGTATCTACTAGAAACCTCATGACTCCGAAACCTGTTTTACGCTCTTATAAAGTTTTACTATTGTTATTTTTGGCTTAATATGTTGGTGGACAGAGTTGTACAACGACTAATACGTTTC
1440 .....GTGTTATAGACTGTTATATTT.....
1441 .....

```

```

1442 .....ATTCTCTGTCTACGAAGAACT.....TCAGTTGTAGTTCTTTACTC.....
1443 .....TCAGTTGTAGTTCTTTACTC.....ATCCTCTAAAGATTAGCAGTA.....
1444 .....ATCCTCTAAAGATTAGCAGTA.....TCTACTAGAAACCTCATGACT.....
1445 .....TCTACTAGAAACCTCATGACT.....ATTTTCGGCTTAATGATTG.....
1446 .....ATTTTCGGCTTAATGATTG.....GTGACGAGATTTGTACAACG.....
1447 .....GTGACGAGATTTGTACAACG.....ACTAATACGTTT.....
1448 .....ACTAATACGTTT.....
1449 .....
1450 .....
1451 .....
1452 .....
1453 .....
1454 .....
1455 .....
1456 .....
1457 .....
1458 .....
1459 .....
1460 //
1461 >PHAS64 excise_beg:7734970 excise_end:7735342 excise_len:373 Phased_ratio:0.833 Phased_num:4 phased_abun:1180
1462 .....TATCGGTCTGATCATGACGT.....TGATAAAATGTAGAAATATA.....
1463 .....TGATAAAATGTAGAAATATA.....TCAAGATCTGTAATGTTATTA.....
1464 .....TCAAGATCTGTAATGTTATTA.....TTAACGACAGTAGATGAGTT.....
1465 .....TTAACGACAGTAGATGAGTT.....ATTATCTACAATCAACGTCACATT.....
1466 .....ATTATCTACAATCAACGTCACATT.....TATAAGGATACAAATTTGCTATAAATTCATATGAATACACATAATAGTAATAACAATTTGTGATAAAATGTAGAAATATA.....
1467 .....TATAAGGATACAAATTTGCTATAAATTCATATGAATACACATAATAGTAATAACAATTTGTGATAAAATGTAGAAATATA.....
1468 .....TATAAGGATACAAATTTGCTATAAATTCATATGAATACACATAATAGTAATAACAATTTGTGATAAAATGTAGAAATATA.....
1469 .....TATAAGGATACAAATTTGCTATAAATTCATATGAATACACATAATAGTAATAACAATTTGTGATAAAATGTAGAAATATA.....
1470 .....
1471 //
1472 >PHAS34 excise_beg:633953 excise_end:634703 excise_len:751 Phased_ratio:0.729 Phased_num:18 phased_abun:4512
1473 .....AATACTCTCATGCATTGGACA.....TCATACAATAAATCCAACCT.....
1474 .....TCATACAATAAATCCAACCT.....ATTGATAAGGAGGACTACCT.....
1475 .....ATTGATAAGGAGGACTACCT.....
1476 .....
1477 .....
1478 .....
1479 .....
1480 .....
1481 .....
1482 .....
1483 .....
1484 .....
1485 .....
1486 .....
1487 .....
1488 .....
1489 .....
1490 .....
1491 .....
1492 .....
1493 .....
1494 .....
1495 //
1496 >PHAS76 excise_beg:14321957 excise_end:14322224 excise_len:268 Phased_ratio:0.400 Phased_num:5 phased_abun:1891
1497 .....TTTTAATTTGAAGTGGTATG.....AGAATGACCGAGATCGGCT.....
1498 .....AGAATGACCGAGATCGGCT.....ATTCTTATATCAATCAACGTCACATT.....
1499 .....ATTCTTATATCAATCAACGTCACATT.....TATAAGGATACAAATTTGCTATAAATTCATATGAATACACATAATAGTAATAACAATTTGTGATAAAATGTAGAAATATA.....
1500 .....TATAAGGATACAAATTTGCTATAAATTCATATGAATACACATAATAGTAATAACAATTTGTGATAAAATGTAGAAATATA.....
1501 .....TATAAGGATACAAATTTGCTATAAATTCATATGAATACACATAATAGTAATAACAATTTGTGATAAAATGTAGAAATATA.....
1502 .....TATAAGGATACAAATTTGCTATAAATTCATATGAATACACATAATAGTAATAACAATTTGTGATAAAATGTAGAAATATA.....
1503 .....TATAAGGATACAAATTTGCTATAAATTCATATGAATACACATAATAGTAATAACAATTTGTGATAAAATGTAGAAATATA.....
1504 .....TATAAGGATACAAATTTGCTATAAATTCATATGAATACACATAATAGTAATAACAATTTGTGATAAAATGTAGAAATATA.....
1505 .....TATAAGGATACAAATTTGCTATAAATTCATATGAATACACATAATAGTAATAACAATTTGTGATAAAATGTAGAAATATA.....
1506 .....TATAAGGATACAAATTTGCTATAAATTCATATGAATACACATAATAGTAATAACAATTTGTGATAAAATGTAGAAATATA.....
1507 .....TATAAGGATACAAATTTGCTATAAATTCATATGAATACACATAATAGTAATAACAATTTGTGATAAAATGTAGAAATATA.....
1508 //
1509 >PHAS23 excise_beg:10138806 excise_end:10139283 excise_len:478 Phased_ratio:0.415 Phased_num:13 phased_abun:1175
1510 .....AAAGACTTACAATGAGTGGG.....AACTCAGGACAGCTGACATTA.....
1511 .....AACTCAGGACAGCTGACATTA.....TCGGCAACATACTTGAGACGA.....
1512 .....TCGGCAACATACTTGAGACGA.....GTGGTTAATAGAATTCGGCTT.....
1513 .....GTGGTTAATAGAATTCGGCTT.....TCTATGACAATTAGAAATCTC.....
1514 .....TCTATGACAATTAGAAATCTC.....TCAAGAAGCA.....
1515 .....TCAAGAAGCA.....
1516 .....
1517 .....
1518 .....
1519 .....
1520 .....
1521 .....
1522 .....
1523 .....
1524 .....
1525 .....
1526 .....
1527 //
1528 >PHAS78 excise_beg:65155769 excise_end:65156099 excise_len:331 Phased_ratio:0.369 Phased_num:6 phased_abun:648
1529 .....CGTTACGGTAGAGATAGAGTG.....TTGTGCAGGTTCTCTCGGA.....
1530 .....CGTTACGGTAGAGATAGAGTG.....TTGTGCAGGTTCTCTCGGA.....
1531 .....TTGTGCAGGTTCTCTCGGA.....AGAAGATTGGGTTTTGGACTA.....
1532 .....AGAAGATTGGGTTTTGGACTA.....TTAAACAAGTTGCATTGTTA.....
1533 .....TTAAACAAGTTGCATTGTTA.....TTGCCCGGTGGAATGGAAGATTAAATTGATGCAATTTGCCGAAATGTCCTATTAGTTTGAAGAACTGTGCATACCACTTCGTTACGGTAGAGATAGAGTG.....
1534 .....TTGCCCGGTGGAATGGAAGATTAAATTGATGCAATTTGCCGAAATGTCCTATTAGTTTGAAGAACTGTGCATACCACTTCGTTACGGTAGAGATAGAGTG.....
1535 .....TTGCCCGGTGGAATGGAAGATTAAATTGATGCAATTTGCCGAAATGTCCTATTAGTTTGAAGAACTGTGCATACCACTTCGTTACGGTAGAGATAGAGTG.....
1536 .....TTGCCCGGTGGAATGGAAGATTAAATTGATGCAATTTGCCGAAATGTCCTATTAGTTTGAAGAACTGTGCATACCACTTCGTTACGGTAGAGATAGAGTG.....
1537 .....TTGCCCGGTGGAATGGAAGATTAAATTGATGCAATTTGCCGAAATGTCCTATTAGTTTGAAGAACTGTGCATACCACTTCGTTACGGTAGAGATAGAGTG.....
1538 .....TTGCCCGGTGGAATGGAAGATTAAATTGATGCAATTTGCCGAAATGTCCTATTAGTTTGAAGAACTGTGCATACCACTTCGTTACGGTAGAGATAGAGTG.....
1539 .....TTGCCCGGTGGAATGGAAGATTAAATTGATGCAATTTGCCGAAATGTCCTATTAGTTTGAAGAACTGTGCATACCACTTCGTTACGGTAGAGATAGAGTG.....
1540 .....TTGCCCGGTGGAATGGAAGATTAAATTGATGCAATTTGCCGAAATGTCCTATTAGTTTGAAGAACTGTGCATACCACTTCGTTACGGTAGAGATAGAGTG.....
1541 //
1542 >PHAS46 excise_beg:31461215 excise_end:31461734 excise_len:520 Phased_ratio:0.501 Phased_num:11 phased_abun:25287
1543 .....AGTGGATGAAATACACTGCA.....ACTTTGATTGCCAGATGATG.....TTTGTGCTGGCTTCACTGTG.....
1544 .....ACTTTGATTGCCAGATGATG.....TTTGTGCTGGCTTCACTGTG.....TGAGTGTATGACGTTGAT.....
1545 .....TTTGTGCTGGCTTCACTGTG.....TGAGTGTATGACGTTGAT.....AATGGTATTTCTAATTTGCTA.....
1546 .....AATGGTATTTCTAATTTGCTA.....TTAGCAATTTGGAATACCAT.....GCACAGTGAA.....
1547 .....TTAGCAATTTGGAATACCAT.....GCACAGTGAA.....
1548 .....GCACAGTGAA.....
1549 .....
1550 .....
1551 .....
1552 .....
1553 .....
1554 .....
1555 .....
1556 .....
1557 .....
1558 .....

```



Genome-wide identification and characterization of phased small interfering RNA genes in response to Botrytis cinerea infection in Solanum lycopersicum  
 Weibo Jin, Yue Chen, Xiaole Zhu, Xin Tian, Fangli Wu

Table S2 Annotation and transcriptional analysis of identified 91 PHASs

| No. | ID         | Chr | Beg-End            | Phased_Ratio | Phased_Abandance | Phased_Number | Phased_Score | Transcriptome | RT-PCR | Location    | Gene_ID         | Annotation                                               |
|-----|------------|-----|--------------------|--------------|------------------|---------------|--------------|---------------|--------|-------------|-----------------|----------------------------------------------------------|
| 1   | Sly-PHAS3  | 8   | 61096825-61098289  | 0.689        | 122160           | 51            | 411.48       | yes           | no     | Intergenic  | -               | -                                                        |
| 2   | Sly-PHAS4  | 1   | 3821576-3822410    | 0.83         | 209390           | 31            | 315.319      | yes           | no     | Intergenic  | -               | -                                                        |
| 3   | Sly-PHAS07 | 4   | 356043-356919      | 0.606        | 19615            | 33            | 197.546      | Yes           | Yes    | Exon        | Soly04g005540.2 | Cc-rls-rr, resistance protein                            |
| 4   | Sly-PHAS1  | 6   | 423568-424045      | 0.944        | 46628            | 19            | 192.911      | yes           | Yes    | Intergenic  | -               | -                                                        |
| 5   | Sly-PHAS21 | 11  | 51384504-513885716 | 0.345        | 19905            | 50            | 170.926      | yes           | Yes    | Intergenic  | -               | -                                                        |
| 6   | Sly-PHAS3  | 12  | 633953-634703      | 0.729        | 4512             | 18            | 110.383      | yes           | Yes    | Intergenic  | -               | -                                                        |
| 7   | Sly-PHAS3  | 11  | 7149517-7150225    | 0.532        | 4421             | 24            | 107.214      | Yes           | Yes    | Intron      | Soly11g013770.1 | Unknown Protein                                          |
| 8   | Sly-PHAS4  | 9   | 66333637-66334345  | 0.643        | 1973             | 21            | 102.393      | yes           | no     | Intergenic  | -               | -                                                        |
| 9   | Sly-PHAS4  | 10  | 51458570-51459425  | 0.545        | 7460             | 21            | 102.104      | yes           | no     | Intergenic  | -               | -                                                        |
| 10  | Sly-PHAS37 | 1   | 11691253-11691898  | 0.849        | 8756             | 13            | 100.237      | yes           | Yes    | Intergenic  | -               | -                                                        |
| 11  | Sly-PHAS4  | 5   | 2501038-2502355    | 0.332        | 6548             | 34            | 99.08        | Yes           | No     | Exon        | Soly05g008070.2 | Cc-rls-rr, resistance protein                            |
| 12  | Sly-PHAS1  | 6   | 37325903-37326401  | 0.854        | 34411            | 11            | 98.184       | Yes           | Yes    | Exon-Intron | Soly06g054600.2 | Zinc finger CCCH domain-containing protein 58            |
| 13  | Sly-PHAS08 | 4   | 363213-364068      | 0.448        | 3165             | 25            | 90.188       | Yes           | Yes    | Exon        | Soly04g005550.1 | Cc-rls-rr, resistance protein                            |
| 14  | Sly-PHAS4  | 12  | 2778979-2779351    | 0.687        | 4968             | 15            | 87.678       | Yes           | No     | Exon        | Soly12g009520.1 | LRR receptor-like serine/threonine-protein kinase, RLP;  |
| 15  | Sly-PHAS31 | 11  | 54896607-54897252  | 0.709        | 2731             | 15            | 84.092       | Yes           | Yes    | Intron      | Soly11g071410.1 | Disease resistance protein R3a-like protein              |
| 16  | Sly-PHAS27 | 11  | 1182678-1183680    | 0.5          | 2880             | 20            | 79.646       | Yes           | Yes    | Exon-Intron | Soly11g006520.1 | Cc-rls-rr, resistance protein                            |
| 17  | Sly-PHAS4  | 2   | 28907395-28908334  | 0.542        | 1070             | 17            | 64.23        | yes           | no     | Exon        | Soly02g032650.2 | Nbs-rr, resistance protein                               |
| 18  | Sly-PHAS4  | 11  | 31461215-31461734  | 0.501        | 25287            | 11            | 55.869       | yes           | no     | Intergenic  | -               | -                                                        |
| 19  | Sly-PHAS47 | 11  | 53108590-53109361  | 0.46         | 1248             | 17            | 55.708       | Yes           | No     | Exon-Intron | Soly11g068360.1 | Cc-rls-rr, resistance protein                            |
| 20  | Sly-PHAS4  | 11  | 54263089-54263986  | 0.455        | 1238             | 17            | 55.047       | Yes           | No     | Exon        | Soly11g069620.1 | Cc-rls-rr, resistance protein                            |
| 21  | Sly-PHAS1  | 6   | 2161857-2162313    | 0.773        | 227              | 12            | 50.304       | Yes           | Yes    | Exon        | Soly06g008300.2 | LRR receptor-like serine/threonine-protein kinase, RLP   |
| 22  | Sly-PHAS4  | 11  | 1242990-1243341    | 0.694        | 6532             | 8             | 48.768       | Yes           | No     | Exon-Intron | Soly11g006640.1 | Cc-rls-rr, resistance protein                            |
| 23  | Sly-PHAS3  | 11  | 54580204-54580912  | 0.33         | 1254             | 19            | 44.769       | yes           | Yes    | Intergenic  | -               | -                                                        |
| 24  | Sly-PHAS1  | 5   | 3823470-3824094    | 0.457        | 865              | 14            | 43.29        | Yes           | Yes    | Intron      | Soly05g009630.2 | Disease resistance protein                               |
| 25  | Sly-PHAS5  | 5   | 264321-264861      | 0.47         | 698              | 14            | 43.074       | Yes           | No     | Exon        | Soly05g005330.2 | Cc-rls-rr, resistance protein with an R1 specific domain |
| 26  | Sly-PHAS5  | 1   | 65142532-65142904  | 0.751        | 778              | 8             | 39.991       | yes           | no     | Intergenic  | -               | -                                                        |
| 27  | Sly-PHAS2  | 11  | 10138806-10139283  | 0.415        | 1175             | 13            | 38.159       | yes           | Yes    | Exon        | Soly11g020100.1 | Cc-rls-rr, resistance protein                            |
| 28  | Sly-PHAS5  | 6   | 37335120-37335597  | 0.367        | 1408             | 14            | 37.282       | Yes           | No     | Exon-Intron | Soly06g054620.2 | Zinc finger CCCH domain-containing protein 34            |
| 29  | Sly-PHAS5  | 11  | 11186857-11187145  | 0.953        | 1978             | 5             | 36.158       | yes           | no     | Intergenic  | -               | -                                                        |
| 30  | Sly-PHAS5  | 1   | 87425595-87425883  | 0.907        | 735              | 6             | 35.901       | Yes           | No     | Intron      | Soly01g096350.2 | Calcium dependent protein kinase-like protein            |
| 31  | Sly-PHAS5  | 9   | 13623048-13623420  | 0.902        | 278              | 7             | 35.524       | Yes           | No     | Exon        | Soly09g018220.1 | Cc-rls-rr, resistance protein                            |
| 32  | Sly-PHAS11 | 7   | 3097032-3097299    | 0.977        | 379              | 6             | 34.822       | Yes           | Yes    | Exon-Intron | Soly07g008320.2 | Calcium-transporting ATPase 1                            |
| 33  | Sly-PHAS5  | 9   | 70361711-70362020  | 0.785        | 4601             | 5             | 33.115       | yes           | no     | Intergenic  | -               | -                                                        |
| 34  | Sly-PHAS57 | 8   | 60064409-60064886  | 0.731        | 139              | 9             | 32.443       | Yes           | No     | Exon        | Soly08g076000.2 | Cc-rls-rr, resistance protein                            |
| 35  | Sly-PHAS0  | 2   | 28004455-28004806  | 0.932        | 307              | 6             | 32.041       | Yes           | Yes    | Intron      | Soly02g032200.2 | Tir-rr, resistance protein fragment                      |
| 36  | Sly-PHAS0  | 1   | 1897637-1898156    | 0.476        | 1635             | 9             | 31.682       | Yes           | Yes    | Exon        | Soly01g007690.2 | Unknown Protein                                          |
| 37  | Sly-PHAS0  | 3   | 33137543-33138062  | 0.454        | 742              | 10            | 30.02        | yes           | Yes    | Intergenic  | -               | -                                                        |
| 38  | Sly-PHAS2  | 11  | 18740259-18740610  | 0.647        | 10225            | 5             | 29.872       | yes           | Yes    | Intergenic  | -               | -                                                        |
| 39  | Sly-PHAS5  | 5   | 844677-845112      | 0.306        | 1421             | 13            | 28.835       | Yes           | No     | Exon        | Soly05g006140.1 | UDP-glucosyltransferase family 1 protein                 |
| 40  | Sly-PHAS2  | 10  | 2340887-2341322    | 0.725        | 134              | 8             | 28.402       | Yes           | Yes    | Exon        | Soly10g008230.1 | Cc-rls-rr, resistance protein                            |
| 41  | Sly-PHAS5  | 12  | 66918286-66918700  | 0.595        | 361              | 8             | 28.008       | Yes           | No     | Exon        | Soly12g100010.1 | LRR receptor-like serine/threonine-protein kinase, RLP   |
| 42  | Sly-PHAS6  | 12  | 2986223-2986595    | 0.913        | 372              | 5             | 27.024       | yes           | No     | Exon        | Soly12g009770.1 | LRR receptor-like serine/threonine-protein kinase, RLP;  |
| 43  | Sly-PHAS6  | 3   | 3344921-3345398    | 0.47         | 2545             | 7             | 25.802       | Yes           | no     | Intergenic  | -               | -                                                        |
| 44  | Sly-PHAS6  | 1   | 1125523-1125895    | 0.508        | 998              | 7             | 24.566       | Yes           | No     | Exon        | Soly01g006550.2 | LRR receptor-like serine/threonine-protein kinase, RLP   |
| 45  | Sly-PHAS2  | 8   | 2161869-2162199    | 0.45         | 2026             | 7             | 23.971       | Yes           | Yes    | Exon        | Soly08g007630.1 | Cc-rls-rr, resistance protein                            |
| 46  | Sly-PHAS6  | 12  | 50481440-50481875  | 0.489        | 455              | 8             | 23.957       | yes           | no     | Intergenic  | -               | -                                                        |
| 47  | Sly-PHAS6  | 7   | 7734970-7735342    | 0.833        | 1180             | 4             | 23.56        | yes           | no     | Intergenic  | -               | -                                                        |
| 48  | Sly-PHAS0  | 5   | 990328-990679      | 0.975        | 124              | 5             | 23.487       | Yes           | Yes    | Exon        | Soly05g006340.2 | WD-40 repeat family protein                              |
| 49  | Sly-PHAS2  | 10  | 2347115-2347403    | 0.875        | 200              | 5             | 23.171       | Yes           | Yes    | Exon        | Soly10g008240.2 | Cc-rls-rr, resistance protein                            |
| 50  | Sly-PHAS11 | 5   | 63987877-63988291  | 0.587        | 245              | 7             | 22.623       | Yes           | Yes    | Exon        | Soly05g054010.2 | Cc-rls-rr, resistance protein                            |
| 51  | Sly-PHAS6  | 1   | 3979632-3979920    | 0.763        | 1468             | 4             | 22.247       | Yes           | No     | Exon        | Soly01g009700.1 | LRR receptor-like serine/threonine-protein kinase, RLP   |
| 52  | Sly-PHAS6  | 7   | 30150665-30150890  | 0.634        | 4744             | 4             | 21.451       | no            | no     | Intergenic  | -               | -                                                        |
| 53  | Sly-PHAS6  | 9   | 4209688-4209997    | 0.602        | 1155             | 5             | 21.232       | no            | no     | Intergenic  | -               | -                                                        |
| 54  | Sly-PHAS6  | 8   | 58953865-58954258  | 0.502        | 1047             | 6             | 20.962       | no            | no     | Intergenic  | -               | -                                                        |
| 55  | Sly-PHAS1  | 6   | 12309851-12310139  | 0.599        | 1073             | 5             | 20.908       | no            | yes    | Intergenic  | -               | -                                                        |
| 56  | Sly-PHAS0  | 3   | 33140166-33140412  | 0.561        | 1610             | 5             | 20.705       | Yes           | Yes    | Intron      | Soly03g063080.1 | Unknown Protein                                          |
| 57  | Sly-PHAS6  | 11  | 1188846-1189218    | 0.587        | 949              | 5             | 20.122       | Yes           | No     | Exon        | Soly11g006530.1 | Cc-rls-rr, resistance protein                            |
| 58  | Sly-PHAS3  | 12  | 2992369-2992699    | 0.659        | 124              | 6             | 19.052       | Yes           | Yes    | Exon        | Soly12g009780.1 | LRR receptor-like serine/threonine-protein kinase, RLP;  |
| 59  | Sly-PHAS0  | 1   | 88580778-88581066  | 0.6          | 464              | 5             | 18.431       | yes           | no     | Intergenic  | -               | -                                                        |
| 60  | Sly-PHAS2  | 11  | 54529614-54529902  | 0.625        | 335              | 5             | 18.179       | Yes           | Yes    | Intron      | Soly11g069930.1 | Disease resistance protein R3a-like protein              |
| 61  | Sly-PHAS7  | 1   | 88582539-88582806  | 0.551        | 486              | 5             | 17.058       | Yes           | No     | Exon        | Soly01g097890.2 | Os03g0370250 Protein                                     |
| 62  | Sly-PHAS7  | 6   | 421966-422170      | 0.653        | 179              | 5             | 16.949       | Yes           | No     | Exon        | Soly06g005410.2 | Unknown Protein                                          |
| 63  | Sly-PHAS2  | 11  | 18662824-18663154  | 0.687        | 464              | 4             | 16.883       | no            | Yes    | Intergenic  | -               | -                                                        |
| 64  | Sly-PHAS7  | 11  | 2717464-2717710    | 0.353        | 397              | 8             | 16.876       | Yes           | No     | Exon-Intron | Soly11g008540.1 | Ribonuclease 3-like protein 3                            |
| 65  | Sly-PHAS7  | 1   | 491972-492344      | 0.614        | 863              | 4             | 16.602       | Yes           | No     | Exon        | Soly01g005730.2 | LRR receptor-like serine/threonine-protein kinase, RLP   |
| 66  | Sly-PHAS2  | 11  | 18645430-18645718  | 0.326        | 1372             | 7             | 16.509       | yes           | Yes    | Intergenic  | -               | -                                                        |
| 67  | Sly-PHAS7  | 6   | 704592-704880      | 0.418        | 2440             | 5             | 16.313       | yes           | no     | Intergenic  | -               | -                                                        |
| 68  | Sly-PHAS7  | 6   | 705061-705328      | 0.493        | 2433             | 4             | 15.365       | yes           | no     | Intergenic  | -               | -                                                        |
| 69  | Sly-PHAS7  | 8   | 14321957-14322224  | 0.4          | 1891             | 5             | 15.083       | yes           | no     | Intergenic  | -               | -                                                        |
| 70  | Sly-PHAS0  | 3   | 33139124-33139433  | 0.528        | 1052             | 4             | 14.691       | yes           | Yes    | Intergenic  | -               | -                                                        |
| 71  | Sly-PHAS7  | 4   | 4340342-4340651    | 0.775        | 102              | 4             | 14.332       | Yes           | No     | Exon        | Soly04g011980.1 | Cc-rls-rr, resistance protein                            |
| 72  | Sly-PHAS7  | 5   | 65155769-65156099  | 0.369        | 648              | 6             | 14.331       | Yes           | No     | Exon        | Soly05g055580.1 | Lysine-specific histone demethylase 1                    |
| 73  | Sly-PHAS7  | 11  | 3369519-33695807   | 0.594        | 362              | 4             | 13.998       | Yes           | No     | Intron      | Soly11g043070.1 | Cc-rls-rr, resistance protein                            |
| 74  | Sly-PHAS8  | 10  | 59189313-59189664  | 0.32         | 401              | 7             | 13.44        | Yes           | No     | Exon-Intron | Soly10g076270.1 | WD repeat-containing protein mip1                        |
| 75  | Sly-PHAS17 | 7   | 61236491-61236821  | 0.659        | 164              | 4             | 13.44        | yes           | no     | Intergenic  | -               | -                                                        |
| 76  | Sly-PHAS3  | 11  | 2719362-2719587    | 0.572        | 276              | 4             | 12.858       | Yes           | Yes    | Exon-Intron | Soly11g008540.1 | Ribonuclease 3-like protein 3                            |
| 77  | Sly-PHAS8  | 9   | 4127097-4127343    | 0.648        | 123              | 4             | 12.477       | Yes           | No     | Intron      | Soly09g010830.2 | Ubiquitin ligase E3                                      |
| 78  | Sly-PHAS16 | 6   | 37334710-37335040  | 0.319        | 555              | 6             | 12.105       | Yes           | Yes    | Exon-Intron | Soly06g054620.2 | Zinc finger CCCH domain-containing protein 34            |
| 79  | Sly-PHAS8  | 11  | 2700537-2700762    | 0.422        | 938              | 4             | 11.543       | Yes           | No     | Exon-Intron | Soly11g008530.1 | Ribonuclease 3-like protein 3                            |
| 80  | Sly-PHAS1  | 8   | 3867752-38678040   | 0.363        | 2614             | 4             | 11.436       | yes           | Yes    | Intergenic  | -               | -                                                        |
| 81  | Sly-PHAS8  | 6   | 11227196-11227400  | 0.444        | 568              | 4             | 11.261       | yes           | no     | Intergenic  | -               | -                                                        |
| 82  | Sly-PHAS8  | x   | 18430364-18430673  | 0.573        | 105              | 4             | 10.659       | yes           | no     | Intergenic  | -               | -                                                        |
| 83  | Sly-PHAS8  | 2   | 29736845-29737175  | 0.306        | 640              | 5             | 9.882        | no            | no     | Intergenic  | -               | -                                                        |
| 84  | Sly-PHAS8  | 8   | 58951365-58951674  | 0.33         | 283              | 5             | 9.313        | yes           | no     | Intergenic  | -               | -                                                        |
| 85  | Sly-PHAS3  | 12  | 65690087-65690417  | 0.464        | 125              | 4             | 8.962        | yes           | yes    | Intergenic  | -               | -                                                        |
| 86  | Sly-PHAS8  | 3   | 3344007-3344274    | 0.327        | 194              | 5             | 8.601        | yes           | no     | Intergenic  | -               | -                                                        |
| 87  | Sly-PHAS8  | 9   | 9815931-9816387    | 0.307        | 103              | 6             | 8.544        | no            | no     | Intergenic  | -               | -                                                        |
| 88  | Sly-PHAS8  | 6   | 32069642-32069888  | 0.334        | 223              | 4             | 7.231        | Yes           | No     | Exon        | Soly06g048960.2 | Ribonuclease 3-like protein 3                            |
| 89  | Sly-PHAS9  | 8   | 58954978-58955287  | 0.318        | 181              | 4             | 6.616        | no            | no     | Intergenic  | -               | -                                                        |
| 90  | Sly-PHAS9  | 10  | 61676305-61676559  | 0.31         | 171              | 4             | 6.379        | yes           | no     | Intergenic  | -               | -                                                        |
| 91  | Sly-PHAS3  | 11  | 2704350-2704554    | 0.315        | 139              | 4             | 6.217        | Yes           | Yes    | Exon        | Soly11g008530.1 | Ribonuclease 3-like protein 3                            |

Table S3 miRNA binding sites were predicted in 91 PHAS loci via psRNAtarget online

| miRNA_Acc.     | Target_Ac | Expectatio | UPE    | miRNA_st | miRNA_er | Target_sta | Target_end | miRNA_aligned_fragment | Target_aligned_fragment | Inhibition  | Target_De: Multiplicity |
|----------------|-----------|------------|--------|----------|----------|------------|------------|------------------------|-------------------------|-------------|-------------------------|
| sly-miR390a-5p | PHAS51    | 1.5        | 10.562 | 1        | 21       | 48         | 68         | AAGCUCAGGAGGGAUAGCACC  | GGUGCUAUCCUACCUAGGACUU  | Translation | 1                       |
| sly-miR390b-5p | PHAS51    | 2          | 10.562 | 1        | 21       | 48         | 68         | AAGCUCAGGAGGGAUAGCACC  | GGUGCUAUCCUACCUAGGACUU  | Translation | 1                       |
| sly-miR6023    | PHAS37    | 1          | 19.085 | 1        | 22       | 49         | 70         | UUCCAUAGAAAGAGUUUUGGAA | AUCUAAAAACUCUUCUGUGGAA  | Cleavage    | 1                       |
| sly-miR482a    | PHAS07    | 3          | 20.012 | 1        | 20       | 49         | 68         | UUUCCAAUUCACCCCAUCC    | GGUUGGGGAGUUGGUA        | Cleavage    | 1                       |
| sly-miR6024    | PHAS50    | 3          | 16.815 | 1        | 22       | 24         | 45         | UUUUAGCAAGAGUUUUUACC   | GGUAGACAACUCUCGUAACA    | Cleavage    | 1                       |
| sly-miR6024    | PHAS43    | 1          | 13.195 | 1        | 22       | 6          | 27         | UUUUAGCAAGAGUUUUUACC   | GGUAGACAACUCUUGCUAGAA   | Cleavage    | 1                       |
| sly-miR482d-3p | PHAS71    | 1          | 11.427 | 1        | 21       | 136        | 156        | UUUCCUUAUCCACCCAUGCCA  | UGGCAUUGGUGGAAUAGGAAA   | Cleavage    | 1                       |
| sly-miR4376    | PHAS18    | 3          | 16.487 | 1        | 22       | 29         | 50         | ACGCAGGAGAGAUAGCUGGA   | UCUGGUGUCAUCUCCUGCGA    | Cleavage    | 1                       |
| sly-miR482e-3p | PHAS39    | 1.5        | 10.951 | 1        | 22       | 19         | 40         | UCUUCUACUCCUCCAUACC    | GGUUGGAGGAGUAGGAAAGA    | Cleavage    | 1                       |
| sly-miR482d-3p | PHAS39    | 3          | 10.883 | 1        | 21       | 18         | 38         | UUUCCUUAUCCACCCAUGCCA  | UGGUAUGGAGGAGUAGGAAA    | Cleavage    | 1                       |
| sly-miR6024    | PHAS55    | 3          | 11.063 | 1        | 22       | 6          | 27         | UUUUAGCAAGAGUUUUUACC   | GGGAAAAACUCUUGCCAAGA    | Cleavage    | 1                       |
| sly-miR6026    | PHAS55    | 2          | 11.063 | 1        | 22       | 7          | 28         | UUUUGGCUAGAGUUGUUAUUGC | GGAAAAACAACUCUUGCCAAGAA | Translation | 1                       |
| sly-miR6024    | PHAS21    | 2          | 9.717  | 1        | 22       | 7          | 28         | UUUUAGCAAGAGUUUUUACC   | GGCAAAACGACUCUUGCUAGAA  | Cleavage    | 1                       |
| sly-miR6024    | PHAS22    | 2          | 8.662  | 1        | 22       | 7          | 28         | UUUUAGCAAGAGUUUUUACC   | GGCAAAACGACUCUUGCUAGAA  | Cleavage    | 1                       |
| sly-miR6024    | PHAS23    | 2          | 22.612 | 1        | 22       | 29         | 50         | UUUUAGCAAGAGUUUUUACC   | GGUAGACAACUCUUGCCAAGAA  | Cleavage    | 1                       |
| sly-miR482b    | PHAS23    | 3          | 21.29  | 1        | 22       | 14         | 35         | UCUUGCCUACACCGCCAUGCC  | GGUUGGGGGUACUGGUAAGA    | Translation | 1                       |
| sly-miR482c    | PHAS23    | 2.5        | 21.29  | 1        | 22       | 14         | 35         | UCUUGCCUACACCGCCAUGCC  | GGUUGGGGGUACUGGUAAGA    | Cleavage    | 1                       |
| sly-miR6024    | PHAS69    | 2.5        | 20.899 | 1        | 22       | 8          | 29         | UUUUAGCAAGAGUUUUUACC   | GGUAGACAACUCUUGCCAAGAA  | Cleavage    | 1                       |
| sly-miR6024    | PHAS28    | 2          | 15.938 | 1        | 21       | 1          | 21         | UUUUAGCAAGAGUUUUUACC   | GUAGACAACACUUGCUAAAG    | Translation | 1                       |
| sly-miR6024    | PHAS48    | 3          | 21.229 | 1        | 22       | 65         | 86         | UUUUAGCAAGAGUUUUUACC   | GGUAGACAACACUAGCUAAAG   | Translation | 1                       |
| sly-miR6024    | PHAS29    | 3          | 19.594 | 1        | 22       | 7          | 28         | UUUUAGCAAGAGUUUUUACC   | GGUAGACAACACUAGCUAAAG   | Translation | 1                       |
| sly-miR482e-3p | PHAS33    | 2.5        | 10.248 | 1        | 22       | 28         | 49         | UCUUCUACUCCUCCAUACC    | GGUUGGAGGAGUAGGAAAGA    | Cleavage    | 1                       |
| sly-miR169b    | PHAS34    | 3          | 14.338 | 1        | 21       | 66         | 86         | UAGCCAAGGAGUACUUGCCUG  | UAGGUAGACAACUUGGCUA     | Translation | 1                       |
| sly-miR169d    | PHAS34    | 3          | 14.338 | 1        | 21       | 66         | 86         | UAGCCAAGGAGUACUUGCCUG  | UAGGUAGACAACUUGGCUA     | Translation | 1                       |
| sly-miR482c    | PHAS34    | 3          | 17.897 | 1        | 22       | 53         | 74         | UCUUGCCUACACCGCCAUGCC  | GGUUGGGGGUACUGGUAAGA    | Translation | 1                       |
| sly-miR169e-5p | PHAS34    | 3          | 14.338 | 1        | 22       | 65         | 86         | UAGCCAAGGAGUACUUGCCUUG | AUAGGUAAGACAACUUGGCUA   | Translation | 1                       |
| sly-miR6023    | PHAS63    | 3          | 17.22  | 1        | 22       | 49         | 70         | UUCCAUGAAAGAUUUUGGAA   | AUCCAAAAACAAGUUAUGGAA   | Translation | 1                       |
| sly-miR6023    | PHAS59    | 3          | 11.495 | 1        | 22       | 5          | 26         | UUCCAUGAAAGAUUUUGGAA   | AUCCAAAAACAAGUUAUGGAA   | Translation | 1                       |
| sly-miR6023    | PHAS44    | 2.5        | 19.684 | 1        | 20       | 51         | 70         | UUCCAUGAAAGAUUUUGG     | CCGAAAAACAGUUAUGGAA     | Translation | 1                       |

Genome-wide identification and characterization of phased small interfering RNA genes in response to *Botrytis cinerea* infection in *Solanum lycopersicum*

Weibo Jin, Yue Chen, Xiaole Zhu, Xin Tian, Fangli Wu

Table S4 Differential expression of 245 phasiRNAs based on sRNA-seq data

| phasiRNA_id | phasiRNA_sequence   | TC7d_raw | TD7d_raw | TC7d_RP10M | TC7d_RP10M | Log2(TD7d/TC7d) | Pvalue | FDR    | Significance |
|-------------|---------------------|----------|----------|------------|------------|-----------------|--------|--------|--------------|
| siR11-1     | AGAAGCAATGTAGCTGA   | 28       | 28       | 16.6       | 20.1       | 0.28            | 0.4726 | 0.7132 |              |
| siR11-11    | AATCAAGTTCAGTCGATT  | 17       | 29       | 10.1       | 20.8       | 1.04            | 0.0161 | 0.0651 |              |
| siR11-13    | TCAAGAAATCAAACAAGG  | 43       | 46       | 25.5       | 33.0       | 0.37            | 0.2236 | 0.4938 |              |
| siR11-14    | TGAGTCTGCAGACACGA   | 684      | 671      | 406.1      | 481.5      | 0.25            | 0.0017 | 0.0106 |              |
| siR05-1     | GAGTGCTTGAATTTGTCG  | 56       | 81       | 33.2       | 58.1       | 0.81            | 0.0012 | 0.0078 |              |
| siR31-3     | AAGAACTTGAGACGGAAA  | 100      | 188      | 59.4       | 134.9      | 1.18            | 0.0000 | 0.0000 | **           |
| siR31-4     | TCTGCGACCTTGAGTAGA  | 13       | 35       | 7.7        | 25.1       | 1.70            | 0.0001 | 0.0009 | **           |
| siR72-4     | ATACTTTAGCTCATGACCT | 60       | 64       | 35.6       | 45.9       | 0.37            | 0.1560 | 0.4042 |              |
| siR72-6     | TTCGGATTTGAGAATGGG  | 65       | 111      | 38.6       | 79.7       | 1.05            | 0.0000 | 0.0000 | **           |
| siR53-5     | AGAAGATCATGAATTTTGG | 650      | 983      | 385.9      | 705.4      | 0.87            | 0.0000 | 0.0000 |              |
| siR55-1     | TTCGAGACGTGATTATCA  | 18       | 43       | 10.7       | 30.9       | 1.53            | 0.0001 | 0.0006 | **           |
| siR55-4     | AGAGTGATCCGAGTTGTG  | 39       | 79       | 23.2       | 56.7       | 1.29            | 0.0000 | 0.0000 | **           |
| siR55-7     | TCTGGACTGGTCTACGTTI | 263      | 299      | 156.1      | 214.6      | 0.46            | 0.0002 | 0.0013 |              |
| siR24-3     | TGAAACTTAAAGGAATTG  | 564      | 408      | 334.8      | 292.8      | -0.19           | 0.0388 | 0.1319 |              |
| siR48-2     | TAAAGCGGTTTACAAATGA | 65       | 46       | 38.6       | 33.0       | -0.23           | 0.4252 | 0.6572 |              |
| siR48-5     | TATGGGAAGTAAGATCAT  | 56       | 39       | 33.2       | 28.0       | -0.25           | 0.4171 | 0.6500 |              |
| siR48-8     | TCCGGAACCTGAAGAGGT  | 1168     | 1032     | 693.4      | 740.5      | 0.09            | 0.1234 | 0.3382 |              |
| siR48-9     | AAGTGAATATGGGACCA   | 18       | 31       | 10.7       | 22.2       | 1.05            | 0.0119 | 0.0505 |              |
| siR13-8     | ATATGAAGGTAATGATGG  | 9        | 30       | 5.3        | 21.5       | 2.02            | 0.0001 | 0.0006 | **           |
| siR67-4     | GGGCACGTGTCGTTGGCT  | 764      | 121      | 453.6      | 86.8       | -2.39           | 0.0000 | 0.0000 | **           |
| siR42-2     | CAGAGGTCTGAAGGGTAG  | 361      | 477      | 214.3      | 342.3      | 0.68            | 0.0000 | 0.0000 |              |
| siR42-3     | TATTTGGAGTACTGAGGC  | 497      | 502      | 295.0      | 360.2      | 0.29            | 0.0016 | 0.0101 |              |
| siR42-4     | AAGTCGAGATGATAGTTG  | 37       | 29       | 22.0       | 20.8       | -0.08           | 0.8409 | 0.9167 |              |
| siR42-5     | TCTATTCATCGAAAGACT  | 75       | 71       | 44.5       | 50.9       | 0.19            | 0.4121 | 0.6435 |              |
| siR42-7     | TTTACTTGTAGAAATAGGC | 132      | 137      | 78.4       | 98.3       | 0.33            | 0.0626 | 0.2004 |              |
| siR42-8     | AGGATTACCTCTCTCGATI | 38       | 16       | 22.6       | 11.5       | -0.97           | 0.0209 | 0.0800 |              |
| siR42-13    | AGTAGTTAATAGAATTCCG | 1910     | 1747     | 1133.9     | 1253.6     | 0.14            | 0.0024 | 0.0137 |              |
| siR42-15    | AAAATCAGGGCAGTTGAC  | 366      | 349      | 217.3      | 250.4      | 0.20            | 0.0575 | 0.1857 |              |
| siR42-16    | CAAAGACTTACTATGAGG  | 332      | 145      | 197.1      | 104.0      | -0.92           | 0.0000 | 0.0000 |              |
| siR42-20    | AAGAAGATCACGAATTTT  | 42       | 44       | 24.9       | 31.6       | 0.34            | 0.2712 | 0.5555 |              |
| siR84-2     | TTAAATAAATGGATTGTT  | 35       | 40       | 20.8       | 28.7       | 0.46            | 0.1610 | 0.4131 |              |
| siR44-7     | GGTCCAATCCGATAACGT  | 18       | 50       | 10.7       | 35.9       | 1.75            | 0.0000 | 0.0000 | **           |
| siR44-11    | AGTTGTAGTCGGCTTAAT  | 39       | 86       | 23.2       | 61.7       | 1.41            | 0.0000 | 0.0000 | **           |
| siR44-13    | ACTTGTGACATGTTAACCC | 108      | 197      | 64.1       | 141.4      | 1.14            | 0.0000 | 0.0000 | **           |
| siR44-14    | TGCTGCACTTGGGACGGG  | 16       | 33       | 9.5        | 23.7       | 1.32            | 0.0020 | 0.0118 | *            |
| siR44-15    | TCATGGAATGAGAGTAAC  | 120      | 379      | 71.2       | 272.0      | 1.93            | 0.0000 | 0.0000 | **           |
| siR41-1     | TCCCTTTGGATGTCTCTT  | 52       | 45       | 30.9       | 32.3       | 0.06            | 0.8163 | 0.9081 |              |
| siR41-2     | TCAGTAAGTTTTGAAGCA  | 291      | 308      | 172.8      | 221.0      | 0.35            | 0.0026 | 0.0141 |              |
| siR41-7     | TATCGAACAGTAGCTGGA  | 76       | 60       | 45.1       | 43.1       | -0.07           | 0.7954 | 0.8874 |              |
| siR41-10    | TCCAGCAAGACTTCACAT  | 7        | 28       | 4.2        | 20.1       | 2.26            | 0.0000 | 0.0003 | **           |
| siR41-12    | ATGCTTCAAACTTACTG   | 20       | 36       | 11.9       | 25.8       | 1.12            | 0.0044 | 0.0221 | *            |
| siR41-13    | TCTTCTGAGCTAGCATCTI | 52       | 38       | 30.9       | 27.3       | -0.18           | 0.5714 | 0.7706 |              |
| siR54-2     | TGGGGACGGTCTTTCCAT  | 49       | 40       | 29.1       | 28.7       | -0.02           | 0.9609 | 0.9750 |              |
| siR54-3     | CTCCATCAGAATTCGGGA  | 94       | 70       | 55.8       | 50.2       | -0.15           | 0.5119 | 0.7305 |              |
| siR54-4     | TGCGGCGACGGATGATCG  | 37       | 50       | 22.0       | 35.9       | 0.71            | 0.0228 | 0.0859 |              |
| siR08-3     | TCTGGGAGGCTCTTTCATG | 34       | 58       | 20.2       | 41.6       | 1.04            | 0.0006 | 0.0045 | **           |
| siR08-6     | AATCAATGGAAGCTCAGA  | 5        | 30       | 3.0        | 21.5       | 2.84            | 0.0000 | 0.0000 | **           |
| siR08-7     | TCATGGAAGTTGGAACCT  | 20       | 32       | 11.9       | 23.0       | 0.95            | 0.0191 | 0.0735 |              |
| siR08-18    | CAAACATGTCGGAACCGC  | 1476     | 1220     | 876.2      | 875.4      | 0.00            | 0.9830 | 0.9882 |              |
| siR75-1     | TAGCTTGACGTATAGAAC  | 439      | 542      | 260.6      | 388.9      | 0.58            | 0.0000 | 0.0000 |              |
| siR75-3     | GATAGAGCAAGGATTGTA  | 28       | 31       | 16.6       | 22.2       | 0.42            | 0.2612 | 0.5543 |              |
| siR52-2     | CAAAGGAAAAGGTCCAGC  | 85       | 60       | 50.5       | 43.1       | -0.23           | 0.3519 | 0.6400 |              |
| siR52-5     | CACCTATCCAGAACTGCG  | 21       | 34       | 12.5       | 24.4       | 0.96            | 0.0142 | 0.0584 |              |
| siR52-9     | TATGAAAACAGGGCACTG  | 141      | 107      | 83.7       | 76.8       | -0.12           | 0.5059 | 0.7274 |              |
| siR52-10    | TGAAAAGGAATGCGCACA  | 493      | 947      | 292.7      | 679.5      | 1.22            | 0.0000 | 0.0000 | **           |
| siR52-11    | TTCATTGAGTTCGTCACAC | 120      | 209      | 71.2       | 150.0      | 1.08            | 0.0000 | 0.0000 | **           |
| siR52-14    | TTTTTAATCTTTTGTGG   | 151      | 259      | 89.6       | 185.9      | 1.05            | 0.0000 | 0.0000 | **           |
| siR15-2     | TATGAAAACAGGGCACTG  | 141      | 107      | 83.7       | 76.8       | -0.12           | 0.5059 | 0.7260 |              |
| siR15-6     | AGCTGGCTGTGGATGGTT  | 571      | 1135     | 339.0      | 814.4      | 1.26            | 0.0000 | 0.0000 | **           |
| siR15-7     | TAATGCTGGAACCTTGAC  | 26       | 34       | 15.4       | 24.4       | 0.66            | 0.0773 | 0.2374 |              |
| siR15-8     | CAAAGGAAAAGGTCCAGC  | 85       | 60       | 50.5       | 43.1       | -0.23           | 0.3519 | 0.6415 |              |
| siR15-9     | TTGCAGTCTCGGATAAGTC | 79       | 70       | 46.9       | 50.2       | 0.10            | 0.6698 | 0.8076 |              |
| siR15-10    | TATAGAAACCTGGAAGCA  | 26       | 45       | 15.4       | 32.3       | 1.07            | 0.0023 | 0.0131 | *            |
| siR19-4     | ATAACATTATAGGATTTCC | 417      | 310      | 247.6      | 222.4      | -0.15           | 0.1545 | 0.4019 |              |
| siR26-2     | GCTTTTAGGACTCCGCCG  | 2047     | 601      | 1215.2     | 431.3      | -1.49           | 0.0000 | 0.0000 | **           |
| siR26-4     | TCTTGGATTTATGAAAGAC | 1558     | 750      | 924.9      | 538.2      | -0.78           | 0.0000 | 0.0000 |              |
| siR47-3     | TGGGAAGTAAGATCATCC  | 86       | 101      | 51.1       | 72.5       | 0.50            | 0.0166 | 0.0671 |              |
| siR47-6     | TCCGGAACCTGAAGAGGT  | 1168     | 1032     | 693.4      | 740.5      | 0.09            | 0.1234 | 0.3370 |              |

|          |                      |      |      |        |        |       |        |        |    |
|----------|----------------------|------|------|--------|--------|-------|--------|--------|----|
| siR47-14 | TCAGCACACATCGTCCGA   | 109  | 71   | 64.7   | 50.9   | -0.35 | 0.1177 | 0.3237 |    |
| siR89-4  | TCATGACCTGGAACAGTT   | 113  | 106  | 67.1   | 76.1   | 0.18  | 0.3502 | 0.6415 |    |
| siR02-6  | AAAGCGTCTGTAGGTGGC   | 236  | 206  | 140.1  | 147.8  | 0.08  | 0.5706 | 0.7709 |    |
| siR38-2  | TCCGGAACCTGAAGAGGT   | 195  | 131  | 115.8  | 94.0   | -0.30 | 0.0652 | 0.2070 |    |
| siR38-5  | AAGTAAAATATGGGAGCT   | 26   | 29   | 15.4   | 20.8   | 0.43  | 0.2659 | 0.5629 |    |
| siR38-9  | TTGTAAAGCGGCTTTAGCA  | 290  | 174  | 172.2  | 124.9  | -0.46 | 0.0007 | 0.0051 |    |
| siR38-14 | CCTTTTAGAAGGATTTGGC  | 0    | 33   | 0.1    | 23.7   | 7.89  | 0.0000 | 0.0000 | ** |
| siR66-1  | CGGATTCTGACTTAGAGG   | 4997 | 1031 | 2966.5 | 739.8  | -2.00 | 0.0000 | 0.0000 | ** |
| siR66-2  | AGGGCACGTGTCGTTGGC   | 61   | 29   | 36.2   | 20.8   | -0.80 | 0.0126 | 0.0532 |    |
| siR66-4  | GCCTCTAAGTCAGAAATCC  | 40   | 27   | 23.7   | 19.4   | -0.29 | 0.4243 | 0.6598 |    |
| siR29-1  | TTTGGTTTGAAAGCTTGGI  | 139  | 130  | 82.5   | 93.3   | 0.18  | 0.3127 | 0.6063 |    |
| siR04-4  | AGGGACTACGGCCTTTTAC  | 416  | 494  | 247.0  | 354.5  | 0.52  | 0.0000 | 0.0000 |    |
| siR04-5  | CGCGGAAGTTTGAGGCAA   | 140  | 67   | 83.1   | 48.1   | -0.79 | 0.0002 | 0.0013 |    |
| siR79-1  | ATGAGTGGGATGACTTGA   | 1083 | 1113 | 642.9  | 798.7  | 0.31  | 0.0000 | 0.0000 |    |
| siR16-1  | GTAGTTTGGGATGGCACT   | 18   | 40   | 10.7   | 28.7   | 1.42  | 0.0003 | 0.0022 | ** |
| siR16-5  | ACGCAAGCCCATATGCAT   | 8    | 61   | 4.7    | 43.8   | 3.22  | 0.0000 | 0.0000 | ** |
| siR16-6  | ACTCTGCAGCTGGAACAG   | 640  | 514  | 379.9  | 368.8  | -0.04 | 0.6189 | 0.7619 |    |
| siR60-1  | TGAGGAATTTGAGGCATC   | 74   | 127  | 43.9   | 91.1   | 1.05  | 0.0000 | 0.0000 | ** |
| siR01-1  | TCCAGAGGCTTTGGACGG   | 203  | 116  | 120.5  | 83.2   | -0.53 | 0.0013 | 0.0087 |    |
| siR01-4  | TCATAAAAAGCAGTCGTG   | 98   | 72   | 58.2   | 51.7   | -0.17 | 0.4504 | 0.6824 |    |
| siR12-3  | TCITTGCTCTAAGGCCAC   | 186  | 243  | 110.4  | 174.4  | 0.66  | 0.0000 | 0.0000 |    |
| siR12-4  | TCAAAATGTTTGTGTTGGAI | 4612 | 4878 | 2738.0 | 3500.3 | 0.35  | 0.0000 | 0.0000 |    |
| siR12-7  | TTGTTAAGGACTCTAATCC  | 2563 | 1787 | 1521.5 | 1282.3 | -0.25 | 0.0000 | 0.0000 |    |
| siR12-9  | TCTTGAGAATTTGATGAAC  | 733  | 555  | 435.2  | 398.3  | -0.13 | 0.1156 | 0.3192 |    |
| siR12-11 | ATAAGGAGACGATTGCAA   | 1917 | 1332 | 1138.0 | 955.8  | -0.25 | 0.0000 | 0.0000 |    |
| siR12-13 | TATTGGGAGAAGTAGTGA   | 474  | 518  | 281.4  | 371.7  | 0.40  | 0.0000 | 0.0001 |    |
| siR12-14 | TTTTAAAGAAAGAAAGAGT  | 110  | 136  | 65.3   | 97.6   | 0.58  | 0.0017 | 0.0103 |    |
| siR12-16 | TGTGGCCTTAGAGCAAAG   | 425  | 587  | 252.3  | 421.2  | 0.74  | 0.0000 | 0.0000 |    |
| siR07-1  | GAGAAAATCAGACAAATG   | 175  | 139  | 103.9  | 99.7   | -0.06 | 0.7255 | 0.8479 |    |
| siR07-2  | AAAAAAGAAAGGTTGTTT   | 11   | 28   | 6.5    | 20.1   | 1.63  | 0.0009 | 0.0061 | ** |
| siR07-3  | AGAATTCAGGATGAGATT   | 2627 | 2078 | 1559.5 | 1491.1 | -0.06 | 0.1266 | 0.3421 |    |
| siR07-6  | CTAGAGAAACTTGGAAATT  | 70   | 61   | 41.6   | 43.8   | 0.07  | 0.7595 | 0.8783 |    |
| siR07-10 | TCTGAAGAGGAAGCATGG   | 165  | 224  | 98.0   | 160.7  | 0.71  | 0.0000 | 0.0000 |    |
| siR07-12 | AATTCAGTCGACGATCC    | 68   | 57   | 40.4   | 40.9   | 0.02  | 0.9331 | 0.9544 |    |
| siR07-25 | TACGCAGCAGATCTCCAC   | 7372 | 5451 | 4376.4 | 3911.5 | -0.16 | 0.0000 | 0.0000 |    |
| siR07-27 | CCAAGATTATAAGGATGC   | 661  | 445  | 392.4  | 319.3  | -0.30 | 0.0007 | 0.0051 |    |
| siR07-28 | TGAATGTCACCTTTGCACC  | 67   | 51   | 39.8   | 36.6   | -0.12 | 0.6634 | 0.8024 |    |
| siR07-29 | AAACATGTCGGAAACGGC   | 811  | 625  | 481.5  | 448.5  | -0.10 | 0.1832 | 0.4547 |    |
| siR27-3  | AGAAGATCATGAATTTTG   | 650  | 983  | 385.9  | 705.4  | 0.87  | 0.0000 | 0.0000 |    |
| siR27-7  | AAATCAGGGCAGTTGACA   | 458  | 436  | 271.9  | 312.9  | 0.20  | 0.0359 | 0.1272 |    |
| siR27-8  | GTGGTTAATAGAATTCGG   | 19   | 60   | 11.3   | 43.1   | 1.93  | 0.0000 | 0.0000 | ** |
| siR27-17 | GAAAAATGGACTTAAACGC  | 22   | 34   | 13.1   | 24.4   | 0.90  | 0.0209 | 0.0796 |    |
| siR27-20 | ATATTGGAGTACTGAGGG   | 563  | 657  | 334.2  | 471.4  | 0.50  | 0.0000 | 0.0000 |    |
| siR61-2  | TAGGATTTTATATACTAGC  | 82   | 103  | 48.7   | 73.9   | 0.60  | 0.0046 | 0.0227 |    |
| siR61-3  | TCCATAGACGAATACCC    | 123  | 116  | 73.0   | 83.2   | 0.19  | 0.3093 | 0.6044 |    |
| siR61-4  | TTTGCTGTACGGTTTCTTG  | 31   | 33   | 18.4   | 23.7   | 0.37  | 0.3104 | 0.6033 |    |
| siR61-5  | AAAGTTAATTGATTGTGCG  | 155  | 251  | 92.0   | 180.1  | 0.97  | 0.0000 | 0.0000 |    |
| siR61-6  | CATGTCATCGAGGAAATT   | 14   | 36   | 8.3    | 25.8   | 1.64  | 0.0001 | 0.0011 | ** |
| siR61-7  | TGAAAATGAACAAGACAG   | 155  | 229  | 92.0   | 164.3  | 0.84  | 0.0000 | 0.0000 |    |
| siR57-1  | CTAGGAAAGACGACACT    | 5790 | 5629 | 3437.3 | 4039.2 | 0.23  | 0.0000 | 0.0000 |    |
| siR57-5  | TACTTGCTTGTCTTAGATG  | 94   | 133  | 55.8   | 95.4   | 0.77  | 0.0001 | 0.0005 |    |
| siR68-3  | TCTTGATCGCAGTTAATCC  | 678  | 589  | 402.5  | 422.6  | 0.07  | 0.3844 | 0.6627 |    |
| siR30-1  | TGCAGGAAGATCATTGTA   | 317  | 214  | 188.2  | 153.6  | -0.29 | 0.0212 | 0.0805 |    |
| siR30-4  | TTTACGTGTCTCACAATC   | 116  | 91   | 68.9   | 65.3   | -0.08 | 0.7113 | 0.8390 |    |
| siR30-16 | AGGAGATGTTGGAAGTAA   | 478  | 685  | 283.8  | 491.5  | 0.79  | 0.0000 | 0.0000 |    |
| siR30-17 | TCTGGATGATGTGTGGAA   | 148  | 120  | 87.9   | 86.1   | -0.03 | 0.8760 | 0.9182 |    |
| siR50-2  | TTCGGAGTGTTAAGAAGG   | 329  | 530  | 195.3  | 380.3  | 0.96  | 0.0000 | 0.0000 |    |
| siR50-14 | ACGAGTTTAGCATGGTAG   | 21   | 31   | 12.5   | 22.2   | 0.83  | 0.0387 | 0.1335 |    |
| siR28-1  | TGATGCTTTTGGATAACC   | 1152 | 1235 | 683.9  | 886.2  | 0.37  | 0.0000 | 0.0000 |    |
| siR28-5  | AAGGGAAGAAGTTTCTTG   | 58   | 74   | 34.4   | 53.1   | 0.63  | 0.0131 | 0.0547 |    |
| siR28-10 | TAGCAGAGCAATAAACGT   | 210  | 265  | 124.7  | 190.2  | 0.61  | 0.0000 | 0.0000 |    |
| siR28-12 | TTGGAATTTACTCAAACG   | 112  | 93   | 66.5   | 66.7   | 0.00  | 0.9722 | 0.9786 |    |
| siR28-14 | AGAGGTTGGAAGAAAAAT   | 53   | 86   | 31.5   | 61.7   | 0.97  | 0.0001 | 0.0007 |    |
| siR28-17 | TCCAGATTTGAAGTGATG   | 145  | 159  | 86.1   | 114.1  | 0.41  | 0.0140 | 0.0580 |    |
| siR28-23 | CATATGTTGAAACAAAGT   | 65   | 88   | 38.6   | 63.1   | 0.71  | 0.0024 | 0.0137 |    |
| siR28-31 | TTCCACACATCATCCAGG   | 29   | 37   | 17.2   | 26.6   | 0.63  | 0.0792 | 0.2415 |    |
| siR28-34 | TTACTTCCTATATCTCCT   | 34   | 56   | 20.2   | 40.2   | 0.99  | 0.0013 | 0.0085 |    |
| siR28-35 | TTACGTGTAGTTACAATG   | 37   | 37   | 22.0   | 26.6   | 0.27  | 0.4105 | 0.6423 |    |
| siR28-42 | AGTACCTGAATGAAACTG   | 680  | 487  | 403.7  | 349.5  | -0.21 | 0.0149 | 0.0612 |    |
| siR28-46 | CCATGGAATAGGACATGT   | 25   | 32   | 14.8   | 23.0   | 0.64  | 0.1004 | 0.2875 |    |
| siR28-49 | ACACATCCGGCAACTCCA   | 43   | 23   | 25.5   | 16.5   | -0.63 | 0.0913 | 0.2646 |    |
| siR32-3  | TCACAGAGTAGAAAAAGT   | 34   | 51   | 20.2   | 36.6   | 0.86  | 0.0066 | 0.0312 |    |
| siR86-4  | TCCCGTTCCGAAGGATATG  | 146  | 108  | 86.7   | 77.5   | -0.16 | 0.3821 | 0.6618 |    |
| siR74-2  | GATAGAGCAAGGATTGTA   | 28   | 31   | 16.6   | 22.2   | 0.42  | 0.2612 | 0.5559 |    |

|          |                      |       |       |         |         |       |        |           |
|----------|----------------------|-------|-------|---------|---------|-------|--------|-----------|
| siR74-4  | TAGCTTGACGTATAGAAC   | 439   | 542   | 260.6   | 388.9   | 0.58  | 0.0000 | 0.0000    |
| siR14-2  | AATTGTCGGGAGGAAGC    | 180   | 160   | 106.9   | 114.8   | 0.10  | 0.5055 | 0.7282    |
| siR82-3  | ACAAC TAGTGACGATCA   | 427   | 853   | 253.5   | 612.1   | 1.27  | 0.0000 | 0.0000 ** |
| siR82-4  | CCATGTAGCAGCATTCCA   | 21    | 72    | 12.5    | 51.7    | 2.05  | 0.0000 | 0.0000 ** |
| siR20-1  | TCTGGATGACGTGTGGAA   | 54    | 29    | 32.1    | 20.8    | -0.63 | 0.0596 | 0.1917    |
| siR20-2  | AGGAGATATAGGAAGTAA   | 246   | 382   | 146.0   | 274.1   | 0.91  | 0.0000 | 0.0000    |
| siR20-6  | TTTACGTGTCGTCACAATC  | 116   | 91    | 68.9    | 65.3    | -0.08 | 0.7113 | 0.8403    |
| siR37-1  | TTTTCGTGGAACAAGAGTG  | 23    | 32    | 13.7    | 23.0    | 0.75  | 0.0555 | 0.1840    |
| siR37-3  | TTCTTTGTGACAGGATGAC  | 25    | 54    | 14.8    | 38.7    | 1.39  | 0.0000 | 0.0003 ** |
| siR83-4  | CCGCGGAAGTTTGAGGCA   | 87    | 41    | 51.6    | 29.4    | -0.81 | 0.0025 | 0.0135    |
| siR03-5  | TAGCTTCTTGAATCTTGAC  | 25    | 39    | 14.8    | 28.0    | 0.92  | 0.0122 | 0.0517    |
| siR03-6  | GAAGAACTCTTTTGCAGCT  | 47    | 30    | 27.9    | 21.5    | -0.38 | 0.2730 | 0.5548    |
| siR70-2  | TCATAAAAAGCAGTCGTG   | 98    | 72    | 58.2    | 51.7    | -0.17 | 0.4504 | 0.6810    |
| siR70-5  | TCCAGAGGCTTTGGACGG   | 203   | 116   | 120.5   | 83.2    | -0.53 | 0.0013 | 0.0086    |
| siR45-14 | CTAACATTGTAGAGGAAG   | 34    | 34    | 20.2    | 24.4    | 0.27  | 0.4298 | 0.6629    |
| siR91-1  | TGAAGGAAAAATGGTAAGT  | 23    | 37    | 13.7    | 26.6    | 0.96  | 0.0111 | 0.0476    |
| siR49-3  | TATTTGGAGTACTGAGGC   | 497   | 502   | 295.0   | 360.2   | 0.29  | 0.0016 | 0.0102    |
| siR49-6  | AGTAGTTAATAGAAATTCG  | 1910  | 1747  | 1133.9  | 1253.6  | 0.14  | 0.0024 | 0.0136    |
| siR49-8  | AAAATCAGGGCAGTTGAC   | 366   | 349   | 217.3   | 250.4   | 0.20  | 0.0575 | 0.1865    |
| siR71-2  | TTTTCAAGCAACATCTAG   | 46    | 290   | 27.3    | 208.1   | 2.93  | 0.0000 | 0.0000 ** |
| siR71-4  | TTGGTATATATGGCATTGC  | 82    | 106   | 48.7    | 76.1    | 0.64  | 0.0023 | 0.0130    |
| siR80-6  | TTCTAGGTTAGTCGTTGG   | 51    | 54    | 30.3    | 38.7    | 0.35  | 0.2045 | 0.4680    |
| siR80-7  | TGGCCTGAATGAAGACAT   | 39    | 31    | 23.2    | 22.2    | -0.06 | 0.8808 | 0.9207    |
| siR06-2  | TCACCGGATCAATCAATCC  | 11    | 33    | 6.5     | 23.7    | 1.87  | 0.0001 | 0.0006 ** |
| siR06-4  | TCGCGAGAAGTCCATTGA   | 164   | 139   | 97.4    | 99.7    | 0.03  | 0.8286 | 0.9072    |
| siR56-1  | TTGGGCTGTACCAGATGG   | 142   | 137   | 84.3    | 98.3    | 0.22  | 0.1980 | 0.4628    |
| siR51-1  | ATAGACAAGGAAGGAGAA   | 162   | 140   | 96.2    | 100.5   | 0.06  | 0.7008 | 0.8396    |
| siR51-2  | TGAAGAAGTCATGACGTA   | 52    | 25    | 30.9    | 17.9    | -0.79 | 0.0240 | 0.0887    |
| siR51-3  | AAGACGTAAGAGATAACA   | 657   | 379   | 390.0   | 272.0   | -0.52 | 0.0000 | 0.0000    |
| siR51-4  | ATGGGGTAGGTAGAGGAA   | 1238  | 727   | 734.9   | 521.7   | -0.49 | 0.0000 | 0.0000    |
| siR51-5  | AAGCGGTGAGAAAAAGCT   | 70    | 41    | 41.6    | 29.4    | -0.50 | 0.0789 | 0.2415    |
| siR51-6  | TTCTTGACCTTGTAAGACC  | 1383  | 448   | 821.0   | 321.5   | -1.35 | 0.0000 | 0.0000 ** |
| siR51-7  | TTCTTGACCTTGTAAGACC  | 896   | 373   | 531.9   | 267.7   | -0.99 | 0.0000 | 0.0000    |
| siR51-8  | TTTTTTGACTTGTGTCCTT  | 125   | 72    | 74.2    | 51.7    | -0.52 | 0.0137 | 0.0571    |
| siR25-3  | ACGCAATGTGATTTCTGCC  | 64    | 81    | 38.0    | 58.1    | 0.61  | 0.0107 | 0.0459    |
| siR25-4  | ACAGCCAACCTCAGAAGT   | 106   | 75    | 62.9    | 53.8    | -0.23 | 0.3041 | 0.5956    |
| siR33-1  | CTTTGCAAGGAATGCTGG   | 34    | 32    | 20.2    | 23.0    | 0.19  | 0.5934 | 0.7851    |
| siR33-3  | TACTGCAACAACTAGAGA   | 1274  | 907   | 756.3   | 650.8   | -0.22 | 0.0005 | 0.0038    |
| siR33-11 | AAACTAGGTTGTTCCGGAA  | 114   | 137   | 67.7    | 98.3    | 0.54  | 0.0031 | 0.0169    |
| siR33-14 | TAAATATCAGCAAGAAAA   | 56    | 107   | 33.2    | 76.8    | 1.21  | 0.0000 | 0.0000 ** |
| siR33-15 | ACCAGCATTCCTTGCAAAA  | 10    | 68    | 5.9     | 48.8    | 3.05  | 0.0000 | 0.0000 ** |
| siR40-1  | TTATGGAATACGAGTAGA   | 28693 | 41377 | 17033.8 | 29690.9 | 0.80  | 0.0000 | 0.0000    |
| siR40-2  | TGATGTACATGGGATGGA   | 422   | 363   | 250.5   | 260.5   | 0.06  | 0.5836 | 0.7747    |
| siR40-4  | CCAAAAACGGTCTTATGG   | 605   | 362   | 359.2   | 259.8   | -0.47 | 0.0000 | 0.0000    |
| siR40-12 | CATTTGTAACATGAGCTGG  | 35    | 25    | 20.8    | 17.9    | -0.22 | 0.5883 | 0.7796    |
| siR40-13 | TGGATTTCTAGATTTATCA  | 10    | 31    | 5.9     | 22.2    | 1.91  | 0.0001 | 0.0007 ** |
| siR40-15 | ATCCATCCCATGTACATCA  | 69    | 232   | 41.0    | 166.5   | 2.02  | 0.0000 | 0.0000 ** |
| siR40-16 | ATGTTTTCTAATCAAGTTC  | 83    | 108   | 49.3    | 77.5    | 0.65  | 0.0018 | 0.0110    |
| siR40-17 | AGTTTTGAAAGTATGTGT   | 26    | 46    | 15.4    | 33.0    | 1.10  | 0.0016 | 0.0101 *  |
| siR40-19 | TACAACAATCTCTACTCG   | 164   | 286   | 97.4    | 205.2   | 1.08  | 0.0000 | 0.0000 ** |
| siR40-20 | CATAGGTATAGAAAGATGA  | 470   | 512   | 279.0   | 367.4   | 0.40  | 0.0000 | 0.0001    |
| siR40-24 | TGTCAAAGATCTTGGAGG   | 92    | 88    | 54.6    | 63.1    | 0.21  | 0.3278 | 0.6093    |
| siR39-3  | TTTTTTTCTCCTCGCATAG  | 50    | 89    | 29.7    | 63.9    | 1.11  | 0.0000 | 0.0001 ** |
| siR39-4  | ACATATTTAGAGTAATGG   | 58    | 68    | 34.4    | 48.8    | 0.50  | 0.0504 | 0.1683    |
| siR39-5  | TGGTTTGGTTCGATTGCACC | 560   | 738   | 332.4   | 529.6   | 0.67  | 0.0000 | 0.0000    |
| siR39-6  | GATAAGCGGGAAGATATG   | 102   | 179   | 60.6    | 128.4   | 1.08  | 0.0000 | 0.0000 ** |
| siR39-7  | TTTGGAAAGTGGAGAAGC   | 1986  | 2907  | 1179.0  | 2086.0  | 0.82  | 0.0000 | 0.0000    |
| siR39-9  | TGGTAGAAAATGAAAGAT   | 29355 | 29931 | 17426.8 | 21477.6 | 0.30  | 0.0000 | 0.0000    |
| siR39-10 | TTTTTGTATTCTTATCGG   | 37    | 24    | 22.0    | 17.2    | -0.36 | 0.3628 | 0.6444    |
| siR39-12 | ACATATATGCCAAGCTTG   | 35    | 21    | 20.8    | 15.1    | -0.46 | 0.2510 | 0.5419    |
| siR39-23 | AGATGTGATTCATAGTAA   | 62    | 44    | 36.8    | 31.6    | -0.22 | 0.4446 | 0.6762    |
| siR39-33 | TTTTTGTCCAAAAGAATC   | 276   | 177   | 163.8   | 127.0   | -0.37 | 0.0079 | 0.0360    |
| siR39-34 | ATTTGCGATGAATTCAGTC  | 50    | 39    | 29.7    | 28.0    | -0.09 | 0.7942 | 0.8940    |
| siR39-35 | TCATATCTTCCCGCTTATC  | 34    | 64    | 20.2    | 45.9    | 1.18  | 0.0001 | 0.0006 ** |
| siR39-36 | ACAAAAGCAAAAATAGGTA  | 120   | 169   | 71.2    | 121.3   | 0.77  | 0.0000 | 0.0001    |
| siR39-37 | TTACCACCTTGCAAGTA    | 78    | 103   | 46.3    | 73.9    | 0.67  | 0.0017 | 0.0105    |
| siR39-38 | ACAAGCTTGGCATATATG   | 28    | 57    | 16.6    | 40.9    | 1.30  | 0.0001 | 0.0005 ** |
| siR39-46 | TCTAGGTGGAGATCTTTCC  | 340   | 346   | 201.8   | 248.3   | 0.30  | 0.0067 | 0.0314    |
| siR69-1  | GTGGTTAATAGAATTCGG   | 19    | 60    | 11.3    | 43.1    | 1.93  | 0.0000 | 0.0000 ** |
| siR69-3  | TCAAGAAGCATTGTCTCT   | 664   | 465   | 394.2   | 333.7   | -0.24 | 0.0057 | 0.0274    |
| siR69-4  | AGAGACAAAATGCTTCTG   | 25    | 40    | 14.8    | 28.7    | 0.96  | 0.0087 | 0.0394    |
| siR43-2  | AGAGACAGATGCTTCTTG   | 47    | 96    | 27.9    | 68.9    | 1.30  | 0.0000 | 0.0000 ** |
| siR43-3  | TCAACAATCAAGAAATGA   | 866   | 1129  | 514.1   | 810.1   | 0.66  | 0.0000 | 0.0000    |
| siR43-4  | ATGATGAATTGATGGTTA   | 7     | 34    | 4.2     | 24.4    | 2.54  | 0.0000 | 0.0000 ** |

|          |                     |      |      |        |        |       |        |        |    |
|----------|---------------------|------|------|--------|--------|-------|--------|--------|----|
| siR43-5  | TGTATAGAAGTCTCAAGG  | 88   | 196  | 52.2   | 140.6  | 1.43  | 0.0000 | 0.0000 | ** |
| siR43-6  | CTTGGGACCAAATGCGAA  | 867  | 1091 | 514.7  | 782.9  | 0.61  | 0.0000 | 0.0000 |    |
| siR43-7  | AAAGCCGAATTATACTAA  | 102  | 185  | 60.6   | 132.8  | 1.13  | 0.0000 | 0.0000 | ** |
| siR43-9  | TATTCAGAAAAGATCGTT  | 4751 | 8541 | 2820.5 | 6128.8 | 1.12  | 0.0000 | 0.0000 | ** |
| siR43-10 | TTATTGTCATTGCTGGACT | 48   | 70   | 28.5   | 50.2   | 0.82  | 0.0023 | 0.0131 |    |
| siR43-11 | TTAGCAAGATAGACGTGA  | 448  | 708  | 266.0  | 508.0  | 0.93  | 0.0000 | 0.0000 |    |
| siR43-13 | ACTTGAAGGCGTGTTTCT  | 23   | 40   | 13.7   | 28.7   | 1.07  | 0.0038 | 0.0198 | *  |
| siR43-17 | ACATAAATGATCGTAGAC  | 84   | 130  | 49.9   | 93.3   | 0.90  | 0.0000 | 0.0001 |    |
| siR43-19 | TGGATGCACGTGAAATTG  | 32   | 71   | 19.0   | 50.9   | 1.42  | 0.0000 | 0.0000 | ** |
| siR43-21 | TCAAGAAGCATCTGTCTC  | 55   | 74   | 32.7   | 53.1   | 0.70  | 0.0060 | 0.0284 |    |
| siR43-23 | ATGACGATTAGAAATCTC  | 108  | 134  | 64.1   | 96.2   | 0.59  | 0.0017 | 0.0103 |    |
| siR43-24 | TCAGTACTCCAAAGATCA  | 47   | 40   | 27.9   | 28.7   | 0.04  | 0.8854 | 0.9230 |    |
| siR43-25 | GTTAGTATAATTCCGGCTT | 38   | 9    | 22.6   | 6.5    | -1.80 | 0.0002 | 0.0017 | ** |
| siR43-27 | TCAGGGGAGCTTGCATAA  | 571  | 660  | 339.0  | 473.6  | 0.48  | 0.0000 | 0.0000 |    |
| siR43-28 | ATCTTTCGTAATTGTGGAC | 36   | 37   | 21.4   | 26.6   | 0.31  | 0.3505 | 0.6404 |    |
| siR43-29 | TGTTGTATGATGTGCTTCC | 38   | 35   | 22.6   | 25.1   | 0.15  | 0.6392 | 0.7781 |    |
| siR43-31 | AAACACAGAATTGCTTGG  | 54   | 82   | 32.1   | 58.8   | 0.87  | 0.0005 | 0.0032 |    |
| siR64-4  | TTAACGAACAGTAGATGA  | 114  | 89   | 67.7   | 63.9   | -0.08 | 0.6889 | 0.8292 |    |
| siR34-4  | ACCAAGTACCTCGGGCCT  | 40   | 23   | 23.7   | 16.5   | -0.52 | 0.1675 | 0.4268 |    |
| siR34-6  | AAACAAGACATAACGAAC  | 279  | 590  | 165.6  | 423.4  | 1.35  | 0.0000 | 0.0000 | ** |
| siR34-16 | AAGATGATGGGCAACTAG  | 25   | 42   | 14.8   | 30.1   | 1.02  | 0.0044 | 0.0218 | *  |
| siR76-2  | AGAAATGAACGGAGATCG  | 186  | 200  | 110.4  | 143.5  | 0.38  | 0.0100 | 0.0432 |    |
| siR76-5  | TTCTGATCACTCAAGTAG  | 439  | 592  | 260.6  | 424.8  | 0.70  | 0.0000 | 0.0000 |    |
| siR23-3  | TCGGCAACATACTTGAGA  | 20   | 62   | 11.9   | 44.5   | 1.90  | 0.0000 | 0.0000 | ** |
| siR23-4  | GTGGTTAATAGAATTCGG  | 19   | 60   | 11.3   | 43.1   | 1.93  | 0.0000 | 0.0000 | ** |
| siR23-11 | AGAGACAAATGCTTCTTG  | 25   | 40   | 14.8   | 28.7   | 0.96  | 0.0087 | 0.0391 |    |
| siR46-1  | AGGTGGATGAAATACACT  | 18   | 40   | 10.7   | 28.7   | 1.42  | 0.0003 | 0.0022 | ** |
| siR46-4  | TGAGATGGTAATAACGGT  | 1362 | 2151 | 808.6  | 1543.5 | 0.93  | 0.0000 | 0.0000 |    |
| siR46-5  | AATGGTATTCTAATATTGC | 15   | 44   | 8.9    | 31.6   | 1.83  | 0.0000 | 0.0001 | ** |

Table S5 Validation of 55 B.cinerea-responsive phasedRNAs using Webqcr's sRNA-seq data<sup>25</sup>

| siRNA id | Log2(TC/NT) Fold | ksa18_q100m | ksa26_q100m | Log2(2h/0h) Fold | P-value | Significance | ksa18_q100m | ksa26_q100m | Log2(2h/0h) Fold | P-value | Significance | ksa18_q100m | ksa26_q100m | Log2(2h/0h) Fold | P-value | Significance | ksa18_q100m | ksa26_q100m | Log2(2h/0h) Fold | P-value | Significance |
|----------|------------------|-------------|-------------|------------------|---------|--------------|-------------|-------------|------------------|---------|--------------|-------------|-------------|------------------|---------|--------------|-------------|-------------|------------------|---------|--------------|
| siR44-15 | 1.93             | 161.91      | 991.79      | 2.41             | 0.0000  | **           | 161.91      | 1798.57     | 3.11             | 0.0000  | **           | 291.41      | 699.29      | 1.31             | 0.0000  | **           | 291.41      | 1180.04     | 2.07             | 0.0000  | **           |
| siR34-6  | 1.35             | 161.91      | 375.27      | 1.21             | 0.0000  | **           | 161.91      | 986.52      | 2.61             | 0.0000  | **           | 584.52      | 2055.07     | 1.81             | 0.0000  | **           | 584.52      | 2932.21     | 2.33             | 0.0000  | **           |
| siR82-3  | 1.27             | 0.01        | 459.69      | 15.48            | 0.0000  | ***          | 0.01        | 144.37      | 13.82            | 0.0000  | ***          | 335.56      | 1512.76     | 2.17             | 0.0000  | **           | 335.56      | 1287.31     | 1.94             | 0.0000  | **           |
| siR44-13 | 1.14             | 161.91      | 180.96      | 2.51             | 0.0000  | **           | 161.91      | 3344.55     | 4.37             | 0.0000  | **           | 923.55      | 2311.95     | 1.28             | 0.0000  | **           | 923.55      | 2028.25     | 1.10             | 0.0000  | **           |
| siR44-11 | 1.41             | 398.55      | 232.06      | 2.55             | 0.0000  | **           | 398.55      | 5197.29     | 3.70             | 0.0000  | **           | 898.42      | 2520.03     | 1.49             | 0.0000  | **           | 898.42      | 1483.99     | 0.72             | 0.0000  |              |
| siR31-3  | 1.18             | 12.46       | 53.61       | 2.11             | 0.0000  | **           | 12.46       | 0.01        | -10.28           | 0.0000  | ***          | 0.01        | 42.81       | 12.08            | 0.0000  | **           | 0.01        | 42.81       | 12.08            | 0.0000  | **           |
| siR08-6  | 2.84             | 12.46       | 134.03      | 3.43             | 0.0000  | **           | 12.46       | 49.12       | 1.95             | 0.0000  | **           | 0.01        | 28.54       | 11.48            | 0.0000  | **           | 0.01        | 28.54       | 11.48            | 0.0000  | **           |
| siR71-2  | 2.93             | 137.00      | 589.72      | 2.11             | 0.0000  | **           | 137.00      | 769.97      | 2.49             | 0.0000  | **           | 281.43      | 470.95      | 0.74             | 0.0000  |              | 281.43      | 1573.38     | 2.48             | 0.0000  | **           |
| siR11-8  | 2.62             | 12.46       | 53.61       | 2.11             | 0.0000  | **           | 12.46       | 72.19       | 2.53             | 0.0000  | **           | 0.01        | 0.01        | 0.01             | 0.0000  | ***          | 0.01        | 0.01        | 0.01             | 0.0000  | ***          |
| siR43-9  | 1.12             | 37.36       | 160.83      | 2.11             | 0.0000  | **           | 37.36       | 409.05      | 3.45             | 0.0000  | **           | 21.65       | 14.27       | 4.60             | 0.0000  | **           | 21.65       | 31.65       | 71.82            | 0.0000  | **           |
| siR23-4  | 1.93             | 49.82       | 187.64      | 1.91             | 0.0000  | **           | 49.82       | 240.62      | 2.27             | 0.0000  | **           | 64.95       | 71.36       | 0.14             | 0.0000  |              | 64.95       | 35.76       | -0.86            | 0.0000  | **           |
| siR27-8  | 1.93             | 49.82       | 187.64      | 1.91             | 0.0000  | **           | 49.82       | 240.62      | 2.27             | 0.0000  | **           | 64.95       | 71.36       | 0.14             | 0.0000  |              | 64.95       | 35.76       | -0.86            | 0.0000  | **           |
| siR69-1  | 1.93             | 49.82       | 187.64      | 1.91             | 0.0000  | **           | 49.82       | 240.62      | 2.27             | 0.0000  | **           | 64.95       | 71.36       | 0.14             | 0.0000  |              | 64.95       | 35.76       | -0.86            | 0.0000  | **           |
| siR15-6  | 1.26             | 74.73       | 241.25      | 1.69             | 0.0000  | **           | 74.73       | 481.23      | 2.69             | 0.0000  | **           | 140.72      | 142.71      | 0.02             | 0.0002  |              | 140.72      | 196.67      | 0.48             | 0.0000  | **           |
| siR82-4  | 2.65             | 0.01        | 107.22      | 13.39            | 0.0000  | ***          | 0.01        | 0.01        | -10.28           | 0.0000  | ***          | 75.77       | 585.12      | 2.55             | 0.0000  | **           | 75.77       | 160.91      | 1.09             | 0.0000  | **           |
| siR52-10 | 1.22             | 274.00      | 321.66      | 0.23             | 0.0000  |              | 274.00      | 601.54      | 1.13             | 0.0000  | **           | 519.57      | 1084.62     | 1.06             | 0.0000  | **           | 519.57      | 1448.23     | 1.48             | 0.0000  | **           |
| siR33-14 | 1.21             | 37.36       | 53.61       | 0.52             | 0.0000  |              | 37.36       | 192.49      | 2.37             | 0.0000  | **           | 21.65       | 256.88      | 3.57             | 0.0000  | **           | 21.65       | 71.52       | 1.72             | 0.0000  | **           |
| siR08-3  | 1.84             | 24.91       | 26.80       | 0.11             | 0.0000  |              | 24.91       | 72.19       | 1.54             | 0.0000  | **           | 0.01        | 28.54       | 11.48            | 0.0000  | **           | 0.01        | 17.88       | 10.80            | 0.0000  | **           |
| siR06-2  | 1.87             | 24.91       | 26.80       | 0.11             | 0.0000  |              | 0.01        | 24.06       | 11.23            | 0.0000  | **           | 10.82       | 14.27       | 0.40             | 0.0000  | **           | 10.82       | 107.28      | 3.31             | 0.0000  | **           |
| siR44-7  | 1.75             | 0.01        | 0.01        | 0.01             | 0.0000  | ***          | 0.01        | 72.19       | 12.82            | 0.0000  | **           | 10.82       | 85.63       | 2.98             | 0.0000  | **           | 10.82       | 71.52       | 2.72             | 0.0000  | **           |
| siR43-7  | 1.13             | 0.01        | 0.01        | 0.01             | 0.0000  | ***          | 0.01        | 24.06       | 11.23            | 0.0000  | **           | 10.82       | 85.63       | 2.98             | 0.0000  | **           | 10.82       | 0.01        | 17.88            | 0.0000  | **           |
| siR07-2  | 1.63             | 921.65      | 2921.77     | 1.66             | 0.0000  | **           | 921.65      | 794.03      | -0.22            | 0.0000  |              | 573.69      | 2360.04     | 2.05             | 0.0000  | **           | 573.69      | 375.47      | -0.61            | 0.0000  | **           |
| siR72-6  | 1.65             | 0.01        | 268.05      | 14.71            | 0.0000  | **           | 0.01        | 0.01        | -10.28           | 0.0000  | ***          | 140.72      | 356.78      | 1.34             | 0.0000  | **           | 140.72      | 125.16      | -0.17            | 0.0000  | **           |
| siR41-10 | 2.26             | 24.91       | 53.61       | 1.11             | 0.0000  | **           | 24.91       | 96.25       | 1.95             | 0.0000  | **           | 10.82       | 0.01        | -10.08           | 0.0000  | **           | 10.82       | 0.01        | -10.08           | 0.0000  | **           |
| siR16-1  | 1.42             | 74.73       | 160.83      | 1.11             | 0.0000  | **           | 74.73       | 192.49      | 1.37             | 0.0000  | **           | 108.24      | 99.90       | -0.12            | 0.0000  | **           | 108.24      | 53.64       | -1.01            | 0.0000  | **           |
| siR32-11 | 1.68             | 946.56      | 3538.29     | 1.90             | 0.0000  | **           | 946.56      | 4932.61     | 2.38             | 0.0000  | **           | 2684.45     | 3881.80     | 0.53             | 0.0000  |              | 2684.45     | 1251.55     | -1.10            | 0.0000  | **           |
| siR52-14 | 1.65             | 298.91      | 260.11      | 3.12             | 0.0000  | **           | 298.91      | 697.78      | 1.22             | 0.0000  | **           | 601.94      | 773.65      | 0.18             | 0.0000  |              | 601.94      | 554.25      | -0.30            | 0.0000  | **           |
| siR43-4  | 2.54             | 24.91       | 53.61       | 1.11             | 0.0000  | **           | 24.91       | 48.12       | 0.95             | 0.0000  | **           | 21.65       | 0.01        | -11.08           | 0.0000  | **           | 21.65       | 53.64       | 1.31             | 0.0000  | **           |
| siR43-25 | -1.80            | 12.46       | 0.01        | -10.28           | 0.0000  | ***          | 12.46       | 0.01        | -10.28           | 0.0000  | ***          | 10.82       | 14.27       | 0.40             | 0.0000  | **           | 10.82       | 0.01        | -10.08           | 0.0000  | **           |
| siR51-6  | -1.55            | 62.27       | 0.01        | -12.60           | 0.0000  | ***          | 62.27       | 72.19       | 0.21             | 0.0000  | **           | 0.01        | 0.01        | -10.08           | 0.0000  | **           | 0.01        | 0.01        | -10.08           | 0.0000  | **           |
| siR37-3  | 1.39             | 62.27       | 26.80       | -1.22            | 0.0000  | **           | 62.27       | 216.55      | 1.80             | 0.0000  | **           | 10.82       | 0.01        | -10.08           | 0.0000  | **           | 10.82       | 0.01        | -10.08           | 0.0000  | **           |
| siR01-6  | 1.64             | 24.91       | 0.01        | -11.28           | 0.0000  | ***          | 24.91       | 0.01        | -11.28           | 0.0000  | ***          | 97.42       | 114.17      | 0.23             | 0.0000  | **           | 97.42       | 53.64       | -0.86            | 0.0000  | **           |
| siR43-2  | 1.50             | 12.46       | 0.01        | -10.28           | 0.0000  | ***          | 12.46       | 0.01        | -10.28           | 0.0000  | ***          | 0.01        | 0.01        | -10.08           | 0.0000  | **           | 0.01        | 53.64       | -0.86            | 0.0000  | **           |
| siR40-15 | 2.02             | 373.64      | 80.42       | -2.22            | 0.0000  | **           | 373.64      | 409.05      | 0.13             | 0.0000  |              | 0.01        | 0.01        | -10.08           | 0.0000  | **           | 0.01        | 0.01        | -10.08           | 0.0000  | **           |
| siR43-19 | 1.42             | 74.73       | 0.01        | -12.87           | 0.0000  | ***          | 74.73       | 48.12       | -0.64            | 0.0000  | **           | 10.82       | 0.01        | -10.08           | 0.0000  | **           | 10.82       | 0.01        | -10.08           | 0.0000  | **           |
| siR39-3  | 1.11             | 286.46      | 459.69      | 0.67             | 0.0000  | **           | 120.31      | 120.31      | -1.25            | 0.0000  | **           | 151.54      | 615.67      | 2.02             | 0.0000  | **           | 151.54      | 71.52       | -1.08            | 0.0000  | **           |
| siR26-2  | -1.49            | 112.09      | 428.88      | 1.54             | 0.0000  | **           | 112.09      | 384.98      | 1.78             | 0.0000  | **           | 1428.82     | 485.23      | -1.56            | 0.0000  | **           | 1428.82     | 1019.12     | -0.49            | 0.0000  | **           |
| siR33-15 | 3.65             | 398.55      | 348.47      | -0.19            | 0.0000  |              | 398.55      | 216.55      | -0.88            | 0.0000  | **           | 97.42       | 1070.35     | 3.46             | 0.0000  | **           | 97.42       | 143.03      | 0.55             | 0.0000  | **           |
| siR46-5  | 1.83             | 298.91      | 402.08      | 0.43             | 0.0000  | **           | 298.91      | 905.29      | 0.76             | 0.0000  | **           | 303.08      | 328.24      | 0.12             | 0.0000  |              | 303.08      | 53.64       | -2.50            | 0.0000  | **           |
| siR43-5  | 1.43             | 348.73      | 268.05      | -0.38            | 0.0000  | **           | 348.73      | 673.72      | 0.95             | 0.0000  | **           | 541.22      | 228.34      | -1.25            | 0.0000  | **           | 541.22      | 232.43      | -1.22            | 0.0000  | **           |
| siR39-8  | 1.30             | 62.27       | 562.91      | -0.15            | 0.0000  | **           | 62.27       | 896.28      | 0.52             | 0.0000  | **           | 616.99      | 884.82      | 0.52             | 0.0000  | **           | 616.99      | 482.74      | -0.35            | 0.0000  | **           |
| siR55-4  | 1.29             | 87.18       | 53.61       | -0.70            | 0.0000  | **           | 87.18       | 48.12       | -0.86            | 0.0000  | **           | 64.95       | 128.44      | 0.98             | 0.0000  | **           | 64.95       | 17.88       | -1.86            | 0.0000  | **           |
| siR39-35 | 1.18             | 274.00      | 187.64      | -0.55            | 0.0000  | **           | 274.00      | 216.55      | -0.34            | 0.0000  | **           | 129.89      | 342.51      | 1.40             | 0.0000  | **           | 129.89      | 89.40       | -0.54            | 0.0000  | **           |
| siR39-6  | 1.08             | 274.00      | 160.83      | -0.77            | 0.0000  | **           | 274.00      | 240.62      | -0.19            | 0.0000  | **           | 119.07      | 185.53      | 0.64             | 0.0000  | **           | 119.07      | 214.55      | 0.85             | 0.0000  | **           |
| siR40-19 | 1.08             | 846.92      | 428.88      | -0.98            | 0.0000  | **           | 846.92      | 769.97      | -0.14            | 0.0000  | **           | 10.82       | 14.27       | 0.40             | 0.0000  | **           | 10.82       | 0.01        | -10.08           | 0.0000  | **           |
| siR66-1  | -2.00            | 24.91       | 26.80       | 0.11             | 0.0000  | **           | 24.91       | 48.12       | 0.95             | 0.0000  | **           | 108.24      | 0.01        | -13.40           | 0.0000  | **           | 108.24      | 143.03      | 0.40             | 0.0000  | **           |
| siR07-4  | -2.39            | 137.00      | 80.42       | -0.77            | 0.0000  | **           | 137.00      | 120.31      | -0.19            | 0.0000  | **           | 151.54      | 114.17      | -0.41            | 0.0000  | **           | 151.54      | 196.67      | 0.38             | 0.0000  | **           |
| siR31-4  | 1.70             | 0.01        | 0.01        | 0.01             | 0.0000  | ***          | 0.01        | 0.01        | -10.28           | 0.0000  | ***          | 0.01        | 0.01        | -10.08           | 0.0000  | **           | 0.01        | 17.88       | 10.80            | 0.0000  | **           |
| siR09-1  | 1.05             | 0.01        | 0.01        | 0.01             | 0.0000  | ***          | 0.01        | 0.01        | -10.28           | 0.0000  | ***          | 0.01        | 0.01        | -10.08           | 0.0000  | **           | 0.01        | 0.01        | -10.08           | 0.0000  | **           |
| siR38-14 | 7.89             | 0.01        | 0.01        | 0.01             | 0.0000  | ***          | 0.01        | 0.01        | -10.28           | 0.0000  | ***          | 0.01        | 0.01        | -10.08           | 0.0000  | **           | 0.01        | 0.01        | -10.08           | 0.0000  | **           |
| siR16-5  | 2.22             | 0.01        | 0.01        | 0.01             | 0.0000  | ***          | 0.01        | 0.01        | -10.28           | 0.0000  | ***          | 0.01        | 0.01        | -10.08           | 0.0000  | **           | 0.01        | 0.01        | -10.08           | 0.0000  | **           |
| siR40-13 | 1.91             | 0.01        | 0.01        | 0.01             | 0.0000  | ***          | 0.01        | 0.01        | -10.28           | 0.0000  | ***          | 0.01        | 0.01        | -10.08           | 0.0000  | **           | 0.01        | 0.01        | -10.08           | 0.0000  | **           |
| siR23-3  | 1.90             | 0.01        | 0.01        | 0.01             | 0.0000  | ***          | 0.01        | 0.01        | -10.28           | 0.0000  | ***          | 0.01        | 0.01        | -10.08           | 0.0000  | **           | 0.01        | 0.01        | -10.08           | 0.0000  | **           |
| siR55-1  | 1.53             | 0.01        | 0.01        | 0.01             | 0.0000  | ***          | 0.01        | 0.01        | -10.28           | 0.0000  | ***          | 0.01        | 0.01        | -10.08           | 0.0000  | **           | 0.01        | 0.01        | -10.08           | 0.0000  | **           |
| siR46-1  | 1.42             | 0.01        | 0.01        | 0.01             | 0.0000  | ***          | 0.01        | 0.01        | -10.28           | 0.0000  | ***          | 0.01        | 0.01        | -10.08           | 0.0000  | **           | 0.01        | 0.01        | -10.08           | 0.0000  | **           |

Table S6 Targets prediction of *B. cinerea*-responsive phasiRNAs via psRNtarget online

| miRNA_Acc. | Target_Acc.      | Expectation | UPE    | miRNA_start | miRNA_end | Target_start | Target_end | miRNA_aligned_fragment              | Target_aligned_fragment | Inhibition                | Target_Desc. | Degradome_evidence |
|------------|------------------|-------------|--------|-------------|-----------|--------------|------------|-------------------------------------|-------------------------|---------------------------|--------------|--------------------|
| siR44-15   | Soly0605540.1.1  | 2           | 12.308 | 1           | 21        | 174          | 194        | UCAUGGAAUGAGAGUA AUCAUCACUCUUAUCCA  | Cleavage                | genomic_reference.S1.2.50 | yes          |                    |
| siR44-15   | Soly02091690.2.1 | 2.5         | 13.831 | 1           | 20        | 1116         | 1135       | UCAUGGAAUGAGAGUA UUGUUCUCUUCGUCCAU  | Cleavage                | genomic_reference.S1.2.50 | no           |                    |
| siR44-15   | Soly03026230.1.1 | 3           | 11.79  | 1           | 20        | 234          | 253        | UCAUGGAAUGAGAGUA GCUUUACUCUGUCUUAU  | Cleavage                | evidence_code:10FH0E01    | yes          |                    |
| siR34-6    | Soly12006040.1   | 0           | 11.662 | 1           | 21        | 48           | 68         | AAACAGACAAACGA CCGUUCGUUAUGUUGUUG   | Cleavage                | evidence_code:10FH0E01    | yes          |                    |
| siR34-6    | Soly02070310.2.1 | 2.5         | 8.326  | 1           | 21        | 553          | 573        | AAACAGACAAACGA CCGUUCGUUAUGUUGUUG   | Cleavage                | genomic_reference.S1.2.50 | yes          |                    |
| siR34-6    | Soly08013940.2.1 | 3           | 19.403 | 1           | 20        | 560          | 579        | AAACAGACAAACGA CCGUUCGUUAUGUUGUUG   | Cleavage                | genomic_reference.S1.2.50 | yes          |                    |
| siR23-3    | Soly01045400.1.1 | 3           | 20.289 | 1           | 20        | 259          | 278        | ACAACUAGUGGAGCAU CAUGAUCUUCUUGUUAU  | Cleavage                | evidence_code:10FH0E01    | yes          |                    |
| siR23-3    | Soly0700620.2.1  | 3           | 13.807 | 1           | 20        | 586          | 605        | ACAACUAGUGGAGCAU GAUUAUUGUUAUCUUAU  | Cleavage                | genomic_reference.S1.2.50 | yes          |                    |
| siR23-3    | Soly09092100.1.1 | 3           | 10.902 | 1           | 20        | 3439         | 3458       | ACAACUAGUGGAGCAU CCGUUCUUCACUUAUUA  | Cleavage                | genomic_reference.S1.2.50 | no           |                    |
| siR23-3    | Soly01006880.2.1 | 3           | 17.143 | 1           | 20        | 2813         | 2832       | ACAACUAGUGGAGCAU CAUCUACCGUUAUCUUAU | Cleavage                | genomic_reference.S1.2.50 | no           |                    |
| siR44-13   | Soly12007140.1.1 | 3           | 12.935 | 1           | 20        | 1942         | 1961       | ACUUGGACAUUUUAU CCGUUAACUUAUCUUAU   | Cleavage                | evidence_code:10FH0E01    | yes          |                    |
| siR44-11   | Soly06074670.2.1 | 3           | 20.95  | 1           | 20        | 333          | 352        | AGUUGAUGCGGCUUA CGUUAUACCGUUAUUAU   | Cleavage                | genomic_reference.S1.2.50 | yes          |                    |
| siR08-6    | Soly01010940.2.1 | 3           | 15.244 | 1           | 21        | 339          | 359        | AUCAAUGGAGAGUCA UCUCUACCUUCCAUUUAU  | Cleavage                | genomic_reference.S1.2.50 | yes          |                    |
| siR08-6    | Soly08075150.2.1 | 3           | 20.425 | 1           | 21        | 915          | 935        | AUCAAUGGAGAGUCA UCUGUUGAGUUAUUAUUA  | Cleavage                | genomic_reference.S1.2.50 | yes          |                    |
| siR08-6    | Soly0101390.2.1  | 3           | 19.316 | 1           | 21        | 1374         | 1394       | AUCAAUGGAGAGUCA UCUCUACCUUCCAUUUAU  | Cleavage                | genomic_reference.S1.2.50 | yes          |                    |
| siR08-6    | Soly12010350.1.1 | 3           | 21.447 | 1           | 20        | 2501         | 2520       | AUCAAUGGAGAGUCA CUUCUUCGUUCCUUAUUA  | Cleavage                | genomic_reference.S1.2.50 | yes          |                    |
| siR08-6    | Soly07007280.2.1 | 3           | 6.587  | 1           | 20        | 103          | 122        | AUCAAUGGAGAGUCA CUUCUUCGUUCCUUAUUA  | Cleavage                | genomic_reference.S1.2.50 | yes          |                    |
| siR71-2    | Soly06090540.2.1 | 0           | 15.71  | 1           | 21        | 324          | 344        | UUUUCAGCAACAUUCUUCUUAUUGUUGUUAUUA   | Cleavage                | genomic_reference.S1.2.50 | yes          |                    |
| siR71-2    | Soly09014710.2.1 | 2.5         | 20.572 | 1           | 21        | 1554         | 1574       | UUUUCAGCAACAUUCUUCUUAUUGUUGUUAUUA   | Cleavage                | genomic_reference.S1.2.50 | yes          |                    |
| siR71-2    | Soly09014740.2.1 | 2.5         | 19.377 | 1           | 21        | 1689         | 1709       | UUUUCAGCAACAUUCUUCUUAUUGUUGUUAUUA   | Cleavage                | genomic_reference.S1.2.50 | yes          |                    |
| siR71-2    | Soly06072650.1.1 | 2           | 15.896 | 1           | 20        | 244          | 263        | UUUUCAGCAACAUUCUUCUUAUUGUUGUUAUUA   | Cleavage                | evidence_code:10FH0E01    | yes          |                    |
| siR71-2    | Soly10076550.1.1 | 3           | 18.149 | 1           | 21        | 806          | 826        | UUUUCAGCAACAUUCUUCUUAUUGUUGUUAUUA   | Cleavage                | evidence_code:10FH0E01    | yes          |                    |
| siR71-2    | Soly10076530.1.1 | 3           | 17.794 | 1           | 21        | 883          | 903        | UUUUCAGCAACAUUCUUCUUAUUGUUGUUAUUA   | Cleavage                | evidence_code:10FH0E01    | yes          |                    |
| siR71-2    | Soly09014730.2.1 | 3           | 18.176 | 1           | 21        | 1473         | 1493       | UUUUCAGCAACAUUCUUCUUAUUGUUGUUAUUA   | Cleavage                | genomic_reference.S1.2.50 | yes          |                    |
| siR71-2    | Soly0805780.2.1  | 3           | 12.581 | 1           | 21        | 314          | 334        | UUUUCAGCAACAUUCUUCUUAUUGUUGUUAUUA   | Cleavage                | genomic_reference.S1.2.50 | yes          |                    |
| siR71-2    | Soly02094920.2.1 | 3           | 20.885 | 1           | 21        | 2044         | 2064       | UUUUCAGCAACAUUCUUCUUAUUGUUGUUAUUA   | Cleavage                | genomic_reference.S1.2.50 | yes          |                    |
| siR71-2    | Soly05015750.2.1 | 3           | 10.547 | 1           | 21        | 904          | 924        | UUUUCAGCAACAUUCUUCUUAUUGUUGUUAUUA   | Cleavage                | genomic_reference.S1.2.50 | yes          |                    |
| siR71-2    | Soly03093990.2.1 | 3           | 23.878 | 1           | 21        | 1233         | 1253       | UUUUCAGCAACAUUCUUCUUAUUGUUGUUAUUA   | Cleavage                | genomic_reference.S1.2.50 | yes          |                    |
| siR71-2    | Soly01091480.2.1 | 3           | 12.876 | 1           | 20        | 1551         | 1570       | UUUUCAGCAACAUUCUUAUUGUUGUUAUUAUUA   | Cleavage                | genomic_reference.S1.2.50 | yes          |                    |
| siR71-2    | Soly05049970.2.1 | 3           | 17.602 | 1           | 20        | 1216         | 1234       | UUUUCAGCAACAUUCUUAUUGUUGUUAUUAUUA   | Cleavage                | genomic_reference.S1.2.50 | yes          |                    |
| siR13-8    | Soly02055420.1.1 | 1.5         | 13.48  | 1           | 20        | 122          | 142        | AUAUGAAGGUAUUAU AUCCAUUAUUAUUAUUAU  | Cleavage                | evidence_code:10FH0E01    | yes          |                    |
| siR13-8    | Soly03011924.2.1 | 3           | 8.635  | 1           | 21        | 163          | 183        | AUAUGAAGGUAUUAU AUCCAUUAUUAUUAUUAU  | Cleavage                | genomic_reference.S1.2.50 | no           |                    |
| siR13-8    | Soly01065520.2.1 | 3           | 9.807  | 1           | 21        | 741          | 761        | AUAUGAAGGUAUUAU GAUCCAUUAUUAUUAUUAU | Cleavage                | genomic_reference.S1.2.50 | no           |                    |
| siR13-8    | Soly06052630.2.1 | 2.5         | 13.034 | 1           | 20        | 2318         | 2337       | AUAUGAAGGUAUUAU GAUCCAUUAUUAUUAUUAU | Cleavage                | genomic_reference.S1.2.50 | no           |                    |
| siR13-8    | Soly0905080.1.1  | 3           | 13.844 | 1           | 20        | 614          | 634        | AUAUGAAGGUAUUAU GAUCCAUUAUUAUUAUUAU | Cleavage                | evidence_code:10FH0E01    | no           |                    |
| siR23-4    | Soly11020100.1.1 | 0           | 9.599  | 1           | 21        | 819          | 839        | GUGGUUAAUAGAUAU AAGCGGAUUCUUAUUAAC  | Cleavage                | genomic_reference.S1.2.50 | no           |                    |
| siR23-4    | Soly11006630.1.1 | 0           | 13.05  | 1           | 21        | 831          | 851        | GUGGUUAAUAGAUAU AAGCGGAUUCUUAUUAAC  | Cleavage                | evidence_code:10FH0E01    | no           |                    |
| siR23-4    | Soly11006530.1.1 | 0           | 11.298 | 1           | 21        | 825          | 845        | GUGGUUAAUAGAUAU AAGCGGAUUCUUAUUAAC  | Cleavage                | evidence_code:10FH0E01    | no           |                    |
| siR23-4    | Soly11006520.1.1 | 0           | 14.042 | 1           | 21        | 813          | 833        | GUGGUUAAUAGAUAU AAGCGGAUUCUUAUUAAC  | Cleavage                | evidence_code:10FH0E01    | no           |                    |
| siR23-4    | Soly10051050.1.1 | 0.5         | 15.467 | 1           | 21        | 117          | 137        | GUGGUUAAUAGAUAU AAGCGGAUUCUUAUUAAC  | Cleavage                | evidence_code:10FH0E01    | yes          |                    |
| siR23-4    | Soly11006640.1.1 | 0.5         | 14.791 | 1           | 21        | 834          | 854        | GUGGUUAAUAGAUAU AAGCGGAUUCUUAUUAAC  | Cleavage                | evidence_code:10FH0E01    | yes          |                    |
| siR23-4    | Soly12017800.1.1 | 0.5         | 9.217  | 1           | 21        | 825          | 845        | GUGGUUAAUAGAUAU AAGCGGAUUCUUAUUAAC  | Cleavage                | evidence_code:10FH0E01    | no           |                    |
| siR23-4    | Soly12017730.1.1 | 1           | 11.913 | 1           | 21        | 135          | 155        | GUGGUUAAUAGAUAU AAGCGGAUUCUUAUUAAC  | Cleavage                | evidence_code:10FH0E01    | no           |                    |
| siR23-4    | Soly08052630.2.1 | 2.5         | 17.71  | 1           | 21        | 849          | 869        | GUGGUUAAUAGAUAU AAGCGGAUUCUUAUUAAC  | Cleavage                | genomic_reference.S1.2.50 | no           |                    |
| siR23-4    | Soly0901890.1.1  | 3           | 22.909 | 1           | 21        | 150          | 170        | GUGGUUAAUAGAUAU AAGCGGAUUCUUAUUAAC  | Cleavage                | evidence_code:10FH0E01    | no           |                    |
| siR23-4    | Soly07014650.2.1 | 3           | 16.84  | 1           | 21        | 938          | 958        | GUGGUUAAUAGAUAU AAGCGGAUUCUUAUUAAC  | Cleavage                | genomic_reference.S1.2.50 | no           |                    |
| siR23-4    | Soly04020100.2.1 | 3           | 19.793 | 1           | 21        | 857          | 877        | GUGGUUAAUAGAUAU AAGCGGAUUCUUAUUAAC  | Cleavage                | genomic_reference.S1.2.50 | no           |                    |
| siR23-4    | Soly0207080.1.1  | 2.5         | 16.476 | 1           | 21        | 852          | 872        | GUGGUUAAUAGAUAU AAGCGGAUUCUUAUUAAC  | Cleavage                | evidence_code:10FH0E01    | no           |                    |
| siR23-4    | Soly01016960.1.1 | 3           | 14.673 | 1           | 21        | 246          | 266        | GUGGUUAAUAGAUAU AAGCGGAUUCUUAUUAAC  | Cleavage                | evidence_code:10FH0E01    | no           |                    |
| siR23-4    | Soly08074250.1.1 | 3           | 18.623 | 1           | 21        | 870          | 890        | GUGGUUAAUAGAUAU AAGCGGAUUCUUAUUAAC  | Cleavage                | evidence_code:10FH0E01    | no           |                    |
| siR23-4    | Soly04011960.1.1 | 3           | 20.727 | 1           | 21        | 846          | 866        | GUGGUUAAUAGAUAU AAGCGGAUUCUUAUUAAC  | Cleavage                | evidence_code:10FH0E01    | no           |                    |
| siR23-4    | Soly04011990.1.1 | 3           | 19.756 | 1           | 21        | 837          | 857        | GUGGUUAAUAGAUAU AAGCGGAUUCUUAUUAAC  | Cleavage                | evidence_code:10FH0E01    | no           |                    |
| siR27-8    | Soly11020100.1.1 | 0           | 9.599  | 1           | 21        | 819          | 839        | GUGGUUAAUAGAUAU AAGCGGAUUCUUAUUAAC  | Cleavage                | evidence_code:10FH0E01    | no           |                    |
| siR27-8    | Soly11006530.1.1 | 0           | 13.05  | 1           | 21        | 831          | 851        | GUGGUUAAUAGAUAU AAGCGGAUUCUUAUUAAC  | Cleavage                | evidence_code:10FH0E01    | no           |                    |
| siR27-8    | Soly11006520.1.1 | 0           | 11.298 | 1           | 21        | 825          | 845        | GUGGUUAAUAGAUAU AAGCGGAUUCUUAUUAAC  | Cleavage                | evidence_code:10FH0E01    | no           |                    |
| siR27-8    | Soly11006510.1.1 | 0           | 14.042 | 1           | 21        | 813          | 833        | GUGGUUAAUAGAUAU AAGCGGAUUCUUAUUAAC  | Cleavage                | evidence_code:10FH0E01    | no           |                    |
| siR27-8    | Soly10051050.1.1 | 0.5         | 15.467 | 1           | 21        | 117          | 137        | GUGGUUAAUAGAUAU AAGCGGAUUCUUAUUAAC  | Cleavage                | evidence_code:10FH0E01    | yes          |                    |
| siR27-8    | Soly11006640.1.1 | 0.5         | 14.791 | 1           | 21        | 834          | 854        | GUGGUUAAUAGAUAU AAGCGGAUUCUUAUUAAC  | Cleavage                | evidence_code:10FH0E01    | yes          |                    |
| siR27-8    | Soly12017800.1.1 | 0.5         | 9.217  | 1           | 21        | 825          | 845        | GUGGUUAAUAGAUAU AAGCGGAUUCUUAUUAAC  | Cleavage                | evidence_code:10FH0E01    | yes          |                    |
| siR27-8    | Soly12017730.1.1 | 1           | 11.913 | 1           | 21        | 135          | 155        | GUGGUUAAUAGAUAU AAGCGGAUUCUUAUUAAC  | Cleavage                | evidence_code:10FH0E01    | yes          |                    |
| siR27-8    | Soly08052630.2.1 | 2.5         | 17.71  | 1           | 21        | 849          | 869        | GUGGUUAAUAGAUAU AAGCGGAUUCUUAUUAAC  | Cleavage                | genomic_reference.S1.2.50 | no           |                    |
| siR27-8    | Soly0901890.1.1  | 3           | 22.909 | 1           | 21        | 150          | 170        | GUGGUUAAUAGAUAU AAGCGGAUUCUUAUUAAC  | Cleavage                | evidence_code:10FH0E01    | no           |                    |
| siR27-8    | Soly07014650.2.1 | 3           | 16.84  | 1           | 21        | 938          | 958        | GUGGUUAAUAGAUAU AAGCGGAUUCUUAUUAAC  | Cleavage                | genomic_reference.S1.2.50 | no           |                    |
| siR27-8    | Soly04020100.2.1 | 3           | 19.793 | 1           | 21        | 857          | 877        | GUGGUUAAUAGAUAU AAGCGGAUUCUUAUUAAC  | Cleavage                | genomic_reference.S1.2.50 | no           |                    |
| siR27-8    | Soly0207080.1.1  | 2.5         | 16.476 | 1           | 21        | 852          | 872        | GUGGUUAAUAGAUAU AAGCGGAUUCUUAUUAAC  | Cleavage                | evidence_code:10FH0E01    | no           |                    |
| siR27-8    | Soly01016960.1.1 | 3           | 14.673 | 1           | 21        | 246          | 266        | GUGGUUAAUAGAUAU AAGCGGAUUCUUAUUAAC  | Cleavage                | evidence_code:10FH0E01    | no           |                    |
| siR27-8    | Soly08074250.1.1 | 3           | 18.623 | 1           | 21        | 870          | 890        | GUGGUUAAUAGAUAU AAGCGGAUUCUUAUUAAC  | Cleavage                | evidence_code:10FH0E01    | no           |                    |
| siR27-8    | Soly04011960.1.1 | 3           | 20.727 | 1           | 21        | 846          | 866        | GUGGUUAAUAGAUAU AAGCGGAUUCUUAUUAAC  | Cleavage                | evidence_code:10FH0E01    | no           |                    |
| siR27-8    | Soly04011990.1.1 | 3           | 19.756 | 1           | 21        | 837          | 857        | GUGGUUAAUAGAUAU AAGCGGAUUCUUAUUAAC  | Cleavage                | evidence_code:10FH0E01    | no           |                    |
| siR69-1    | Soly11020100.1.1 | 0           | 9.599  | 1           | 21        | 819          | 839        | GUGGUUAAUAGAUAU AAGCGGAUUCUUAUUAAC  | Cleavage                | evidence_code:10FH0E01    | no           |                    |
| siR69-1    | Soly11006630.1.1 | 0           | 13.05  | 1           | 21        | 831          | 851        | GUGGUUAAUAGAUAU AAGCGGAUUCUUAUUAAC  | Cleavage                | evidence_code:10FH0E01    | no           |                    |
| siR69-1    | Soly11006530.1.1 | 0           | 11.298 | 1           | 21        | 825          | 845        | GUGGUUAAUAGAUAU AAGCGGAUUCUUAUUAAC  | Cleavage                | evidence_code:10FH0E01    | no           |                    |
| siR69-1    | Soly11006520.1.1 | 0           | 14.042 | 1           | 21        | 813          | 833        | GUGGUUAAUAGAUAU AAGCGGAUUCUUAUUAAC  | Cleavage                | evidence_code:10FH0E01    | no           |                    |
| siR69-1    | Soly10051050.1.1 | 0.5         | 15.467 | 1           | 21        | 117          | 137        | GUGGUUAAUAGAUAU AAGCGGAUUCUUAUUAAC  | Cleavage                | evidence_code:10FH0E01    | yes          |                    |
| siR69-1    | Soly11006640.1.1 | 0.5         | 14.791 | 1           | 21        | 834          | 854        | GUGGUUAAUAGAUAU AAGCGGAUUCUUAUUAAC  | Cleavage                | evidence_code:10FH0E01    | yes          |                    |
| siR69-1    | Soly12017800.1.1 | 0.5         | 9.217  | 1           | 21        | 825          | 845        | GUGGUUAAUAGAUAU AAGCGGAUUCUUAUUAAC  | Cleavage                | evidence_code:10FH0E01    | no           |                    |
| siR69-1    | Soly12017730.1.1 | 1           | 11.913 | 1           | 21        | 135          | 155        | GUGGUUAAUAGAUAU AAGCGGAUUCUUAUUAAC  | Cleavage                | evidence_code:10FH0E01    | no           |                    |
| siR69-1    | Soly08052630.2.1 | 2.5         | 17.71  | 1           | 21        | 849          | 869        | GUGGUUAAUAGAUAU AAGCGGAUUCUUAUUAAC  | Cleavage                | genomic_reference.S1.2.50 | no           |                    |
| siR69-1    | Soly0901890.1.1  | 3           | 22.909 | 1           | 21        | 150          | 170        | GUGGUUAAUAGAUAU AAGCGGAUUCUUAUUAAC  | Cleavage                | evidence_code:10FH0E01    | no           |                    |
| siR69-1    | Soly07014650.2.1 | 3           | 16.84  | 1           | 21        | 938          | 958        | GUGGUUAAUAGAUAU AAGCGGAUUCUUAUUAAC  | Cleavage                | genomic_reference.S1.2.50 | no           |                    |
| siR69-1    | Soly04020100.2.1 | 3           | 19.793 | 1           | 21        | 857          | 877        | GUGGUUAAUAGAUAU AAGCGGAUUCUUAUUAAC  | Cleavage                | genomic_reference.S1.2.50 | no           |                    |
| siR69-1    | Soly0207080.1.1  | 2.5         | 16.476 | 1           | 21        | 852          | 872        | GUGGUUAAUAGAUAU AAGCGGAUUCUUAUUAAC  | Cleavage                | evidence_code:10FH0E01    | no           |                    |
| siR69-1    | Soly01016960.1.1 | 3           | 14.673 |             |           |              |            |                                     |                         |                           |              |                    |



|          |                    |     |        |   |    |      |      |                                              |                          |     |
|----------|--------------------|-----|--------|---|----|------|------|----------------------------------------------|--------------------------|-----|
| siR07-2  | Solye08g068300.2.1 | 2.5 | 7.161  | 1 | 20 | 106  | 125  | AAAAAGAAAGGUUGU UAGAACAAUUUUUUUUU Cleavage   | genomic_reference:SL2.50 | yes |
| siR07-2  | Solye01g006490.2.1 | 3   | 21.054 | 1 | 21 | 1975 | 1995 | AAAAAGAAAGGUUGU UUUUAUACCGCCUUUUUUU Cleavage | genomic_reference:SL2.50 | yes |
| siR07-2  | Solye02g021440.2.1 | 3   | 12.386 | 1 | 21 | 194  | 214  | AAAAAGAAAGGUUGU UUUAAAAACUUUUUUU Cleavage    | genomic_reference:SL2.50 | yes |
| siR07-2  | Solye07g065930.2.1 | 3   | 11.08  | 1 | 20 | 37   | 56   | AAAAAGAAAGGUUGU AUAAAAACUUUUUUU Cleavage     | genomic_reference:SL2.50 | yes |
| siR07-2  | Solye01g091370.2.1 | 3   | 9.153  | 1 | 20 | 53   | 72   | AAAAAGAAAGGUUGU AUAAUUAACUUUUUUU Cleavage    | genomic_reference:SL2.50 | yes |
| siR07-2  | Solye07g041520.2.1 | 3   | 12.322 | 1 | 20 | 2268 | 2287 | AAAAAGAAAGGUUGU UUCAACACUUUUUUU Cleavage     | genomic_reference:SL2.50 | yes |
| siR07-2  | Solye07g06540.2.1  | 3   | 12.465 | 1 | 20 | 3430 | 3449 | AAAAAGAAAGGUUGU UUAAGAAACUUUUUUU Cleavage    | genomic_reference:SL2.50 | yes |
| siR07-2  | Solye04g082770.2.1 | 3   | 9.045  | 1 | 20 | 24   | 43   | AAAAAGAAAGGUUGU UUAACAACUUUUUUU Cleavage     | genomic_reference:SL2.50 | yes |
| siR07-2  | Solye01g102740.2.1 | 3   | 7.95   | 1 | 20 | 52   | 71   | AAAAAGAAAGGUUGU UUAACUUAUUUUUUU Cleavage     | genomic_reference:SL2.50 | yes |
| siR07-2  | Solye05g051570.2.1 | 3   | 16.066 | 1 | 20 | 1048 | 1067 | AAAAAGAAAGGUUGU UUCAGGAUUCUUUUUUU Cleavage   | genomic_reference:SL2.50 | yes |
| siR07-2  | Solye02g014720.2.1 | 3   | 11.978 | 1 | 20 | 1037 | 1056 | AAAAAGAAAGGUUGU UGGAAACAAUUUUUUU Cleavage    | genomic_reference:SL2.50 | yes |
| siR07-2  | Solye01g014820.1.1 | 3   | 10.692 | 1 | 20 | 178  | 197  | AAAAAGAAAGGUUGU UUAAGUGCCUUUUUUU Cleavage    | evidence_code:10F0H1E0I  | yes |
| siR07-2  | Solye04g082580.2.1 | 3   | 15.15  | 1 | 20 | 130  | 149  | AAAAAGAAAGGUUGU UUAAGAUGCCUUUUUUU Cleavage   | genomic_reference:SL2.50 | yes |
| siR72-6  | Solye11g008540.1.1 | 0   | 15.532 | 1 | 21 | 528  | 548  | UUCGGAUUUGAGAAUG UAUCCAUUCUCAAUCC Cleavage   | evidence_code:10F0H1E1I  | no  |
| siR72-6  | Solye11g008520.1.1 | 0.5 | 13.801 | 1 | 21 | 693  | 713  | UUCGGAUUUGAGAAUG UAUCCGUUCUCAAUCC Cleavage   | evidence_code:10F0H1E0I  | no  |
| siR72-6  | Solye11g008530.1.1 | 0.5 | 13.559 | 1 | 21 | 528  | 548  | UUCGGAUUUGAGAAUG UAUCCAUUCUCAAUCC Cleavage   | evidence_code:10F0H1E1I  | no  |
| siR72-6  | Solye08g080900.2.1 | 2   | 15.898 | 1 | 20 | 26   | 45   | UUCGGAUUUGAGAAUG AUUCCAUUCUCAAUCC Cleavage   | genomic_reference:SL2.50 | yes |
| siR72-6  | Solye11g072320.1.1 | 3   | 16.097 | 1 | 21 | 1000 | 1020 | UUCGGAUUUGAGAAUG UAUCCAUUCUCAAUCC Cleavage   | evidence_code:10F0H1E1I  | yes |
| siR72-6  | Solye05g046280.1.1 | 3   | 13.351 | 1 | 20 | 1493 | 1512 | UUCGGAUUUGAGAAUG CUUUCUUCUCAAUCC Cleavage    | evidence_code:10F0H1E0I  | yes |
| siR72-6  | Solye05g008370.1.1 | 3   | 19.273 | 1 | 21 | 294  | 314  | UUCGGAUUUGAGAAUG UAUCCUUAUCAGAUUC Cleavage   | evidence_code:10F0H1E1I  | yes |
| siR72-6  | Solye05g052840.1.1 | 2.5 | 7.728  | 1 | 20 | 233  | 252  | UUCGGAUUUGAGAAUG AUCCGACUUAUAAUCCG Cleavage  | evidence_code:10F0H1E1I  | yes |
| siR72-6  | Solye08g075550.2.1 | 3   | 15.566 | 1 | 21 | 666  | 686  | UUCGGAUUUGAGAAUG UAUCCGAUUAUCAAUCC Cleavage  | genomic_reference:SL2.50 | no  |
| siR43-25 | Solye08g008070.2.1 | 0   | 8.533  | 1 | 21 | 827  | 847  | GUUAGUAUAAUUCGGC UAAAAGCCGAAUUAUCU Cleavage  | genomic_reference:SL2.50 | no  |
| siR43-25 | Solye07g049700.1.1 | 0.5 | 8.68   | 1 | 21 | 843  | 863  | GUUAGUAUAAUUCGGC UAAAAGCCGAAUUAUCU Cleavage  | evidence_code:10F0H1E1I  | no  |
| siR43-25 | Solye10g051050.1.1 | 1.5 | 15.007 | 1 | 21 | 114  | 134  | GUUAGUAUAAUUCGGC UAAAAGCCGAAUUAUCU Cleavage  | evidence_code:10F0H1E1I  | yes |
| siR43-25 | Solye11g020100.1.1 | 1.5 | 10.674 | 1 | 21 | 816  | 836  | GUUAGUAUAAUUCGGC UAAAAGCCGAAUUAUCU Cleavage  | evidence_code:10F0H1E1I  | yes |
| siR43-25 | Solye11g00640.1.1  | 1.5 | 14.818 | 1 | 21 | 831  | 851  | GUUAGUAUAAUUCGGC UAAAAGCCGAAUUAUCU Cleavage  | evidence_code:10F0H1E1I  | yes |
| siR43-25 | Solye11g006530.1.1 | 1.5 | 12.59  | 1 | 21 | 822  | 842  | GUUAGUAUAAUUCGGC UAAAAGCCGAAUUAUCU Cleavage  | evidence_code:10F0H1E0I  | yes |
| siR43-25 | Solye11g006520.1.1 | 1.5 | 14.002 | 1 | 21 | 810  | 830  | GUUAGUAUAAUUCGGC UAAAAGCCGAAUUAUCU Cleavage  | evidence_code:10F0H1E1I  | yes |
| siR43-25 | Solye11g006630.1.1 | 2   | 14.41  | 1 | 21 | 828  | 848  | GUUAGUAUAAUUCGGC UAGAAGCCGAAUUAUCU Cleavage  | evidence_code:10F0H1E1I  | yes |
| siR43-25 | Solye12g017800.1.1 | 2.5 | 11.166 | 1 | 21 | 822  | 842  | GUUAGUAUAAUUCGGC UAGAAGCCGAAUUAUCU Cleavage  | evidence_code:10F0H1E0I  | yes |
| siR43-25 | Solye12g017730.1.1 | 3   | 11.931 | 1 | 21 | 132  | 152  | GUUAGUAUAAUUCGGC UAGAAGCCGAAUUAUCU Cleavage  | evidence_code:10F0H1E0I  | yes |
| siR43-25 | Solye11g070170.1.1 | 3   | 11.665 | 1 | 20 | 1169 | 1188 | GUUAGUAUAAUUCGGC AAGAGCCUAAUUAUCUA Cleavage  | evidence_code:10F0H1E1I  | yes |
| siR43-25 | Solye11g072310.1.1 | 3   | 16.799 | 1 | 20 | 143  | 162  | GUUAGUAUAAUUCGGC AGAAGCCAAUUAUCUA Cleavage   | evidence_code:10F1H1E1I  | yes |
| siR43-25 | Solye04g015220.2.1 | 3   | 18.397 | 1 | 20 | 679  | 698  | GUUAGUAUAAUUCGGC AAAAGUCGAAUUUUGUUC Cleavage | genomic_reference:SL2.50 | yes |

Genome-wide identification and characterization of phased small interfering RNA genes in response to *Botrytis cinerea* infection in *Solanum lycopersicum*

Fangli Wu, Yue Chen, Xing Tian, Xiaole Zhu, Weibo Jin

Table S7 Primers used in this study.

| name                     | Sequence |                           | Annealing temp |
|--------------------------|----------|---------------------------|----------------|
| RT-PCR for 91 PHAS genes |          |                           |                |
| Sly-PHAS01               | F        | TTGTCATCCCGGACATTCT       | 53             |
|                          | R        | TGACTTCCACAAGCTGATTT      |                |
| Sly-PHAS02               | F        | GCAATAGCTTACCAAGGCGATGA   | 55             |
|                          | R        | TCTACGCATTTACCGCTCCA      |                |
| Sly-PHAS03               | F        | GGGAGGTATTGGCAAACTA       | 50             |
|                          | R        | CATACCGAGTACCGCATTTA      |                |
| Sly-PHAS04               | F        | GAAGGGAACCACCAGGAGTG      | 59             |
|                          | R        | AAGGGCAGGGACGTAGTCAA      |                |
| Sly-PHAS05               | F        | CGATCGGGGATAATCGTCGG      | 62             |
|                          | R        | GCCCAAGTCCCCTGAAACGG      |                |
| Sly-PHAS06               | F        | GTTCGCGGGTCGTTCTGTTG      | 60             |
|                          | R        | CTACGTCCCTGCCCTTTGCA      |                |
| Sly-PHAS07               | F        | GGTAAGACAACACTGACTGAGAAAA | 55             |
|                          | R        | GAAGCCCCATTCCATATCTAAG    |                |
| Sly-PHAS08               | F        | AAGGAGTCGGTCTAACATTGGAAGG | 58             |
|                          | R        | ATGCTTTCCTCAGACGCAATATA   |                |
| Sly-PHAS09               | F        | GACTACAAGTCTCTAAACAAGAGAC | 49             |
|                          | R        | GATCAGCAGATAAAACAGTGAGA   |                |
| Sly-PHAS10               | F        | CTTGAAATGACTCCACCGATTA    | 54             |
|                          | R        | AGCTGCGGAGACGACTATGT      |                |
| Sly-PHAS11               | F        | TGCTCTTGGGGCGCTTAGTA      | 60             |
|                          | R        | CGCAAAGGAGTTGCAGTGGT      |                |
| Sly-PHAS12               | F        | GAGAAATGGAGAAGTTGCCTCT    | 52             |
|                          | R        | TTGGCATCAAGGTATCTACGA     |                |
| Sly-PHAS13               | F        | ATCAGAGCTGCTTTCCAAAA      | 55             |
|                          | R        | GATCTCATAGCGATCCGTGT      |                |
| Sly-PHAS14               | F        | CCGCTTCCCTCCCGACAATT      | 61             |
|                          | R        | GGTGAGATCCCCGTCGTTCC      |                |
| Sly-PHAS15               | F        | GCTGCGACCCTCTGTCTTCTT     | 57             |
|                          | R        | CCGACACGGGAACCACTCT       |                |
| Sly-PHAS16               | F        | ACGGGAACCACTTCAGGG        | 55             |
|                          | R        | TGTCTCCTTGTATCGCTATCTCC   |                |
| Sly-PHAS17               | F        | AGAGTGGTTTGGAAATGGGTA     | 51             |
|                          | R        | CTTCAGCCGATCAATTATGTG     |                |

|            |   |                          |    |
|------------|---|--------------------------|----|
| Sly-PHAS18 | F | CTTACCCTCCACCTTTTCAA     | 55 |
|            | R | TCCTGCGACAGTAGAGGAAT     |    |
| Sly-PHAS19 | F | GCCCCGACTATCTTTGTTAATC   | 55 |
|            | R | TCTCGTAGTTGGACTTTGGGATG  |    |
| Sly-PHAS20 | F | GAAATTGGCTCAACCGACTTA    | 54 |
|            | R | GACCAAGAGGCTTCAGTAGACA   |    |
| Sly-PHAS21 | F | CATCACTTCTACATTCGTGCTTGG | 55 |
|            | R | AACTTCAGGCTCTGGTCCACACT  |    |
| Sly-PHAS22 | F | GATTGGCAAACGACTCTTG      | 55 |
|            | R | ATCTTTTCACGACATCCCAT     |    |
| Sly-PHAS23 | F | AGTTTTACAAGTTGACGAGGACAT | 55 |
|            | R | TGGTATGGGCGGTATCGGTA     |    |
| Sly-PHAS24 | F | AAGTTTCCCCGTGTTGAGTC     | 55 |
|            | R | AACTGCGAAAGCATTACCAA     |    |
| Sly-PHAS25 | F | CGCTGGATAGTAGAAAGGCAC    | 54 |
|            | R | TGGGGACGGACAAGGAACGG     |    |
| Sly-PHAS26 | F | GCCTTACGACCATACTCCCC     | 55 |
|            | R | GTCCTATTACATTGGCCTTCGGG  |    |
| Sly-PHAS27 | F | CGCTGGACGATAAACTTGCT     | 54 |
|            | R | TAGAGGTCTGAAGGGTAGGAGA   |    |
| Sly-PHAS28 | F | GTTGCCCTGGATGATGTG       | 50 |
|            | R | TCAATCAGCACCTGGAA        |    |
| Sly-PHAS29 | F | TGCGGGTAAGACAACACTAG     | 51 |
|            | R | CATTTCTCAGGTTATCCCCTC    |    |
| Sly-PHAS30 | F | CAACCTCTGATTTGGAGCGTAAC  | 55 |
|            | R | TACCATGATGAGAGGGTGAAGAA  |    |
| Sly-PHAS31 | F | CGATTATCTGTTGCTCCCATCT   | 55 |
|            | R | TGCAGCTACATACCACCTCACT   |    |
| Sly-PHAS32 | F | GGACCAAAGGATTTGAGAT      | 49 |
|            | R | AATAGACTTACCAGCCCCTT     |    |
| Sly-PHAS33 | F | ATGGGGTATGGAAGGAGTAAGAA  | 54 |
|            | R | CAGTCTTCCAAACCATAAACGC   |    |
| Sly-PHAS34 | F | AGGTGATGAGGCAAGTGATAGTA  | 54 |
|            | R | GGAATGGGTGGCATAGGTAAG    |    |
| Sly-PHAS35 | F | CTTCAGCCGATCAATTATGTG    | 53 |
|            | R | CAGAGTGGTTTGGAAATGGGTA   |    |
| Sly-PHAS36 | F | TGGGACGGAGTTACTTGTGA     | 53 |
|            | R | GAAAGATCAAGGGAAACCAA     |    |
| Sly-PHAS37 | F | AGATTGTTGCTCATGGGATG     | 53 |
|            | R | ATTCTAAGATGGAAAGGTGG     |    |
| Sly-PHAS38 | F | GGAATGGGCGGCTTGGGTAA     | 60 |
|            | R | CAATTTGGGCTAAATCGTTG     |    |
| Sly-PHAS39 | F | GGGATGGATTACAACCTTGAT    | 55 |

|            |   |                           |    |
|------------|---|---------------------------|----|
|            | R | ATGATATTGGGATAGGTCTTTC    |    |
| Sly-PHAS40 | F | TACCAAAAGAAGGAGAAAGG      | 55 |
|            | R | CCACAAGCTCAGAAACAAC       |    |
| Sly-PHAS41 | F | GGAATAAAATCAACAGCTCAGG    | 55 |
|            | R | GTCTTCCTAACGATGAGTGTCG    |    |
| Sly-PHAS42 | F | TGTTTCCAAGTTGATTAGGCT     | 55 |
|            | R | ACTAAGGCATTGTTGGCGGA      |    |
| Sly-PHAS43 | F | ACTGACGGACCTTCTTACCA      | 55 |
|            | R | GGGAGCTTTTGACCAACTAT      |    |
| Sly-PHAS44 | F | GAGCTACCTCCTTCACTAACTG    | 55 |
|            | R | GCAACATGGATTCCTTTGG       |    |
| Sly-PHAS45 | F | AAACAACATATCATAGGACCCT    | 55 |
|            | R | AATTAACCTTTTGCTGCCAAG     |    |
| Sly-PHAS46 | F | AAAATCTTGAGCAATGAGTCAT    | 55 |
|            | R | GATTCCTCACTCTTTTCTTTTGG   |    |
| Sly-PHAS47 | F | CTTTACCCTTCTTGATCGG       | 55 |
|            | R | GATTGAATGCTAATGTACGTTG    |    |
| Sly-PHAS48 | F | CTTTACCCAATGTATTGTCTGC    | 55 |
|            | R | GTTTTGAAATCCCTGATGCT      |    |
| Sly-PHAS49 | F | TTTGGTTATAGTCCCTTTTGTC    | 55 |
|            | R | TTCCCTAACAATTTGTAGGTG     |    |
| Sly-PHAS50 | F | TCCGTTCTCTAATTGTTATCTC    | 55 |
|            | R | CCATTGGCTAAAGAATTGATGT    |    |
| Sly-PHAS51 | F | CTTGACTCATTGGTGGCATA      | 55 |
|            | R | TAGAATCGTCTTCTGGTGGG      |    |
| Sly-PHAS52 | F | ATGTTTCTAATGGAGGCATAGTG   | 55 |
|            | R | TTCTTGACTCATTGGTGGC       |    |
| Sly-PHAS53 | F | ACAAGACACCTCCCTCAAAC      | 55 |
|            | R | AACGGAGACATTTTCTAGATATTTT |    |
| Sly-PHAS54 | F | CCAAGAGGATTTTCTATTTGA     | 55 |
|            | R | TGTGTTGGAAGAGTAGGGTAAG    |    |
| Sly-PHAS55 | F | TTGTTGTCTTGATGATGTGC      | 55 |
|            | R | ACTCATGATCCCTGTTTTCTAG    |    |
| Sly-PHAS56 | F | TGTCATTGACCTGCATCTAGTC    | 55 |
|            | R | ATAATCAAATTGCCACTTGGC     |    |
| Sly-PHAS57 | F | TATGGGAAAAGGGACAGATT      | 55 |
|            | R | GGATGGTTGTTTTATGGGTT      |    |
| Sly-PHAS58 | F | CAAATTTGCAATCCCCATAC      | 55 |
|            | R | ATGCCAATCTTCTCACTCTGC     |    |
| Sly-PHAS59 | F | CCCCATCACAATAAATTTTCA     | 55 |
|            | R | AGCTTCTTAGAGGGACTACAAC    |    |
| Sly-PHAS60 | F | CAAGGAGCAGGATGCACAAA      | 55 |
|            | R | GGTCAATGAACTAAAGCGAGAA    |    |

|            |   |                            |    |
|------------|---|----------------------------|----|
| Sly-PHAS61 | F | AGCCAGTACTTGTTGACCGA       | 55 |
|            | R | TTAGGAGCCCCCTTGACAA        |    |
| Sly-PHAS62 | F | TCTTGAATCACTAACAATGCCT     | 55 |
|            | R | AATTTTCATCAAATCCCAAGG      |    |
| Sly-PHAS63 | F | CAATGTTAAGGCCACAGGAG       | 55 |
|            | R | CCCTTTTCTTTATGCTTTCTG      |    |
| Sly-PHAS64 | F | GTGAAGTAGAAAGACAATCCATTG   | 55 |
|            | R | GTTCTCTAATTGTGATCTGCC      |    |
| Sly-PHAS65 | F | CTGTAATGCCATATCCTTCGA      | 55 |
|            | R | GACCGACAGTCAATTAACCAC      |    |
| Sly-PHAS66 | F | CATCTTCATGTGAGGTGTATGG     | 55 |
|            | R | GCATCGAATATGTAGAGTTCCAC    |    |
| Sly-PHAS67 | F | AATAATACTTGACAAGGTGGGT     | 55 |
|            | R | CAGGCTCGGACAAATAGA         |    |
| Sly-PHAS68 | F | TTGGCTAATGCTGCAAAGCTCGA    | 55 |
|            | R | TGAAGCAAGGTCTGGAAATAGCACA  |    |
| Sly-PHAS69 | F | TAATGGAGTTTGTGTACAGAGGTC   | 55 |
|            | R | TATGATCAGCTTCACTTAGGCAC    |    |
| Sly-PHAS70 | F | TGAAACCAGATTGGAAAGGTATGAG  | 55 |
|            | R | TTATTGGACTTCTCCCCGTGTGAT   |    |
| Sly-PHAS71 | F | TGCCTCAAATTCCTCAACCG       | 55 |
|            | R | GGAGATTCTGAAGCCCAACC       |    |
| Sly-PHAS72 | F | TATTGTAGGAATGGGTGGTGC      | 55 |
|            | R | CGTTACCTGAACAAAAGTCTT      |    |
| Sly-PHAS73 | F | ACCTTGCTTACAATGACTTTTATCC  | 55 |
|            | R | GGTTTAGTGTGTGGAGATGATGAAG  |    |
| Sly-PHAS74 | F | ATTGATTGTCCACTAAGTCTGTTG   | 55 |
|            | R | GGAAAAATTCAAGAGTTCAAGTCCA  |    |
| Sly-PHAS75 | F | TCTATGGAATCTCACCAACATAGTG  | 55 |
|            | R | CAAGTAGTTTGATGACAACCAAAGT  |    |
| Sly-PHAS76 | F | GTTGATGGAAGGCTCCTAAAAAG    | 55 |
|            | R | AAGCTATCGTGTGCTGGATTATG    |    |
| Sly-PHAS77 | F | GACTTGCTATGAGGAGGAAAA      | 55 |
|            | R | CCTATATTCGTTCTCGATTGA      |    |
| Sly-PHAS78 | F | TTCAAGTCCAAAACATTAAGTGTCG  | 55 |
|            | R | GCTAATGACCCTTAAAGAGTTTCCA  |    |
| Sly-PHAS79 | F | CCATTCGTTACGGTAGAGATAGAGT  | 55 |
|            | R | CCCAAAACACATACGGGAATAACAA  |    |
| Sly-PHAS80 | F | AAACTGTGCATACCATTTCGTTACAG | 55 |
|            | R | CTTATTGTATCTAGCTTTCGTTGAG  |    |
| Sly-PHAS81 | F | TGTGTATAGAAGTCTCAAGGGTAGG  | 55 |
|            | R | CTAATCTTACCACTCCTTTGACTTG  |    |
| Sly-PHAS82 | F | GGATTCCCCCTCCTATGTATCTGCCT | 55 |

|                     |   |                             |    |
|---------------------|---|-----------------------------|----|
|                     | R | GGCTCATTCGTGATCAATTTGAG     |    |
| Sly-PHAS83          | F | AACTTCCAGTCTTCCCTATAATTGG   | 55 |
|                     | R | GCGTTGCATGAACAACAGTAAACTA   |    |
| Sly-PHAS84          | F | GTAGAGATTGTTGTTTATGGGATGG   | 55 |
|                     | R | CGAGCCGTAGACTACCAGTAGCATA   |    |
| Sly-PHAS85          | F | TCATAAAAAGCAGTCGTGTCGT      | 55 |
|                     | R | GGAGCGGTAAAGAAGCCATC        |    |
| Sly-PHAS86          | F | CTGAGCCATATGATGCTTTGAGAAT   | 55 |
|                     | R | GAACAGAACTCCTTTACAAGACCAT   |    |
| Sly-PHAS87          | F | TTACTACCAAAGGCAGTCAAGA      | 55 |
|                     | R | TATTTCTACAAGTAAAGGAGGACAC   |    |
| Sly-PHAS88          | F | ACAACCTCTCGCTAACAAGCTATTTTC | 55 |
|                     | R | CAGGACAACCTGAAAGAGGTAGCC    |    |
| Sly-PHAS89          | F | TATCCTAATGTTGTTGATCTTGTGA   | 55 |
|                     | R | CCAACCTCAAGCAACGGTTTAT      |    |
| Sly-PHAS90          | F | CAGCCTGCCACCCCTGGAAT        | 55 |
|                     | R | CGGCGACTTAGCCAACGACA        |    |
| Sly-PHAS91          | F | CTTTGTCATCCCGGACATTC        | 55 |
|                     | R | CATTGACTTCCACAAGCTGATTT     |    |
| Quantitative RT-PCR |   |                             |    |
| siR15-2             | F | TATGAAAACAGGGCACTGTAA       | 60 |
| siR15-6             | F | AGCTGGCTGTGGATGGTTAAA       | 60 |
| siR26-2             | F | GCTTTTAGGACTCCGCCGGCA       | 60 |
| siR26-4             | F | TCTTGGATTATGAAAGACGA        | 60 |
| Ubi3-F              |   | GCCGACTACAACATCCAGAAGG      | 60 |
| Ubi3-R              |   | TGCAACACAGCGAGCTTAACC       |    |
